# Supplementary material for: Aluminum porphyrins with quaternary ammonium halides as catalysts for copolymerization of cyclohexene oxide and CO2: metal–ligand cooperative catalysis
Source: Royal Society of Chemistry journal article supplement (doi:10.1039/d0sc01609h), 2020-01-01
Supplement: d0sc01609h1.pdf [file d0sc01609h1.pdf]

*Electronic Supplementary Information*

**Aluminum porphyrins with quaternary ammonium halides as catalysts  
for copolymerization of cyclohexene oxide and CO<sub>2</sub>: Metal–ligand cooperative catalysis**

Jingyuan Deng,<sup>a</sup> Manussada Ratanasak,<sup>b</sup> Yuma Sako,<sup>c</sup> Hideki Tokuda,<sup>c</sup> Chihiro Maeda,<sup>c</sup>  
Jun-ya Hasegawa,<sup>\*b</sup> Kyoko Nozaki<sup>\*a</sup> and Tadashi Ema<sup>\*c†</sup>

<sup>a</sup> *Department of Chemistry and Biotechnology, Graduate School of Engineering,  
The University of Tokyo, 7-3-1 Hongo, Bunkyo-ku, Tokyo 113-8656, Japan*

<sup>b</sup> *Institute for Catalysis, Hokkaido University, Kita 21, Nishi 10, Kita-ku, Sapporo,  
Hokkaido 001-0021, Japan*

<sup>c</sup> *Division of Applied Chemistry, Graduate School of Natural Science and Technology,  
Okayama University, Tsushima, Okayama 700-8530, Japan*

<sup>†</sup> *Cooperative Research Fellow, Institute for Catalysis, Hokkaido University*

**Table of contents**

**< Experimental details >**

|     |                                                        |     |
|-----|--------------------------------------------------------|-----|
| [1] | General methods -----                                  | S1  |
| [2] | Synthesis and characterizations of Al porphyrins ----- | S1  |
| [3] | Copolymerization reactions -----                       | S8  |
| [4] | Kinetic experiments -----                              | S15 |

**< Computational details >**

|      |                                                                                               |     |
|------|-----------------------------------------------------------------------------------------------|-----|
| [5]  | Computational details -----                                                                   | S18 |
| [6]  | Intermediate and transition-state structures -----                                            | S19 |
| [7]  | Comparison between 1,2-diaxial and 1,2-diequatorial conformations -----                       | S21 |
| [8]  | Energy for ring flip from 1,2-diaxial to 1,2-diequatorial conformations -----                 | S24 |
| [9]  | Binding energies of Al <sup>III</sup> and Mg <sup>II</sup> porphyrins for axial ligands ----- | S25 |
| [10] | Energy for the dissociation of the carbonate anion from the Al atom -----                     | S26 |
| [11] | Cartesian coordinates -----                                                                   | S27 |

## [1] General methods.

**Instrumentation.** NMR spectra were recorded on a Bruker Ascend 500 ( $^1\text{H}$ : 500 MHz and  $^{13}\text{C}$ : 126 MHz) or a JEOL-ECS400 spectrometer ( $^1\text{H}$ : 400 MHz and  $^{13}\text{C}$ : 100 MHz). Size-exclusion chromatography (SEC) was carried out with two columns (Shodex KF-804L) using THF as an eluent at 1 mL/min at 40 °C, where molecular weights were calibrated by using standard polystyrene samples. Electrospray ionization (ESI) mass spectra were recorded on a Bruker micrOTOF. Matrix-assisted laser desorption/ionization time-of-flight (MALDI-TOF) mass spectroscopic measurements were performed on a Bruker Autoflex III or a Shimadzu AXIMA-CFR plus mass spectrometer. IR spectra were recorded on a Shimadzu IRAffinity-1 spectrophotometer. Real-time IR measurements were performed on a Mettler Toledo ReactIR 45 and analyzed by iCIR.

**Materials.** Most reagents for the synthesis of the catalysts were purchased and used without further purification unless otherwise specified. Dry solvents were purchased or distilled over an appropriate drying agent or passed through solvent purification columns attached to a GlassContour solvent purification system. Cyclohexene oxide (CHO) was freshly distilled from  $\text{CaH}_2$ . Bis(triphenylphosphine)iminium chloride (PPNCl) was recrystallized from  $\text{CH}_2\text{Cl}_2/\text{Et}_2\text{O}$  under  $\text{N}_2$ , while PPNBr was prepared from PPNCl and NaBr in hot water and recrystallized from  $\text{CH}_2\text{Cl}_2/\text{Et}_2\text{O}$  under  $\text{N}_2$ .

**Manipulation for polycarbonate synthesis.** All the copolymerization reactions were performed in a 50-mL stainless steel autoclave. When the catalyst and CHO were put in the autoclave, standard glovebox and Schlenk techniques were used, respectively, under  $\text{N}_2$  or Ar purified by passing through a hot column packed with BASF catalyst R3-11.

## [2] Synthesis and characterizations of Al porphyrins.

Compounds **3-Cl**, **4-Br**, and **5** were prepared and characterized according to the previously reported methods.<sup>S1</sup>

## References

- (S1) (a) T. Ema, Y. Miyazaki, S. Koyama, Y. Yano and T. Sakai, *Chem. Commun.*, 2012, **48**, 4489;  
(b) T. Ema, Y. Miyazaki, J. Shimonishi, C. Maeda and J. Hasegawa, *J. Am. Chem. Soc.*, 2014, **136**, 15270.

## Synthesis of 6.

Et<sub>2</sub>AlCl (0.87 M in hexane, 0.56 mL, 0.49 mmol) was slowly added to a solution of **5** (500 mg, 376 μmol)

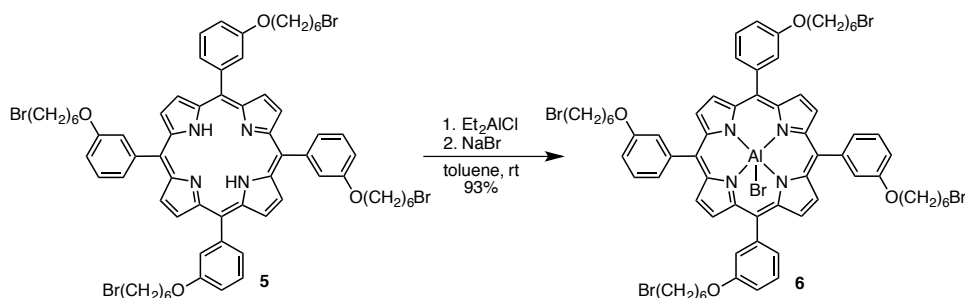

in dry toluene (11.3 mL), and the mixture was stirred at rt for 3 h. The mixture was diluted with CHCl<sub>3</sub>, washed with 1 M NaBr aq., and dried over Na<sub>2</sub>SO<sub>4</sub>. The product was purified by silica gel column chromatography (CHCl<sub>3</sub>/MeOH (10:1)), dissolved in CHCl<sub>3</sub>, and washed with 3% HBr aq. and then 1 M NaBr aq. The solution was dried over Na<sub>2</sub>SO<sub>4</sub> and evaporated to give **6** (503 mg, 93%) as a purple solid.

<sup>1</sup>H NMR (DMSO-*d*<sub>6</sub>, 400 MHz) δ 1.49 (m, 16H), 1.83 (m, 16H), 3.53 (t, *J* = 6.8 Hz, 8H), 4.21 (t, *J* = 6.2 Hz, 8H), 7.43–7.46 (m, 4H), 7.73 (s, 12H), 9.02 ppm (s, 8H); <sup>13</sup>C NMR (DMSO-*d*<sub>6</sub>, 100 MHz, 60 °C) δ 24.6, 25.8, 28.4, 31.7, 44.9, 67.6, 114.0, 119.6, 120.8, 126.8, 127.6, 131.6, 142.0, 146.3, 157.0 ppm; HR-MS (ESI): *m/z* = 1355.2102. calcd for C<sub>68</sub>H<sub>72</sub>N<sub>4</sub>O<sub>4</sub>AlBr<sub>4</sub>: 1355.2070 [M–Br]<sup>+</sup>; IR (KBr) 2936, 2859, 1597, 1576, 1472, 1427, 1350, 1314, 1285, 1260, 1209, 1184, 1072, 1013, 802, 783, 723, 702 cm<sup>-1</sup>.

## Synthesis of 2-Br.

A sealed tube containing **6** (95.8 mg, 66.7 μmol) and Bu<sub>3</sub>N (0.67 mL, 2.8 mmol) in dry CHCl<sub>3</sub> (0.67 mL) and dry CH<sub>3</sub>CN (0.67 mL) was heated at 70 °C for 1 week. After the solvents were evaporated,

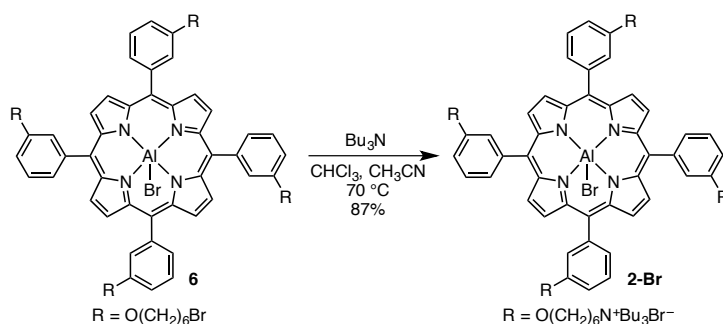

excess Bu<sub>3</sub>N was removed by pipette, and the residue was precipitated with CH<sub>2</sub>Cl<sub>2</sub>/Et<sub>2</sub>O. The crude product was dissolved in CH<sub>2</sub>Cl<sub>2</sub>, and the solution was vigorously washed with 3% HBr (×1) and 1 M NaBr aq. (×2), dried over Na<sub>2</sub>SO<sub>4</sub>, and evaporated to give **2-Br** (126 mg, 87%) as a purple solid.

<sup>1</sup>H NMR (CD<sub>3</sub>OD, 400 MHz, 60 °C) δ 1.00 (t, *J* = 7.6 Hz, 36H), 1.39–1.81 (m, 72H), 1.94 (m, 8H), 3.22–3.27 (m, 32H), 4.25 (t, *J* = 6.4 Hz, 8H), 7.42 (d, *J* = 7.9 Hz, 4H), 7.70 (t, *J* = 7.6 Hz, 4H), 7.77 (s, 8H), 9.10 ppm (s, 8H); <sup>13</sup>C NMR (CD<sub>3</sub>OD, 100 MHz, 60 °C) δ 14.0, 20.7, 22.9, 24.9, 26.8, 27.2, 30.3, 59.5, 59.7, 69.1, 115.0, 121.7, 122.4, 128.5, 128.9, 132.9, 144.5, 149.1, 159.1 ppm; HR-MS (ESI): *m/z* = 1008.5728. calcd for C<sub>116</sub>H<sub>180</sub>N<sub>8</sub>O<sub>4</sub>AlBr<sub>3</sub>: 1008.5724 [M–2Br]<sup>2+</sup>; IR (KBr) 2959, 2936, 2874, 1595, 1576, 1472, 1423, 1383, 1350, 1285, 1260, 1184, 1167, 1069, 1011, 885, 800, 783, 721, 702 cm<sup>-1</sup>.

### Synthesis of 2-Cl.

A solution of **2-Br** (127 mg, 58.3  $\mu\text{mol}$ ) in  $\text{CH}_2\text{Cl}_2$  was vigorously washed with 3% HCl ( $\times 2$ ) and brine ( $\times 1$ ), dried over  $\text{Na}_2\text{SO}_4$ , and evaporated to give **2-Cl** (111 mg, 97%) as a blue-purple solid.

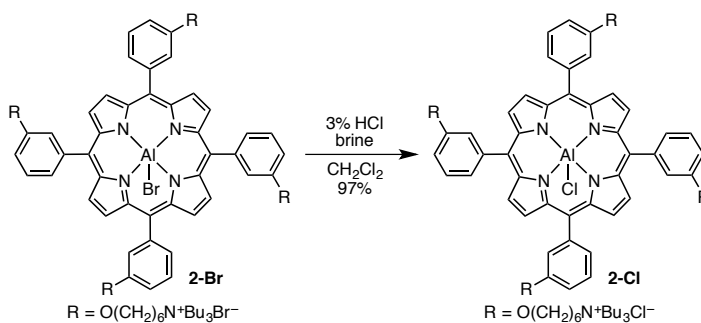

$^1\text{H}$  NMR ( $\text{CD}_3\text{OD}$ , 400 MHz, 60  $^\circ\text{C}$ )  $\delta$  1.01

(t,  $J = 7.2$  Hz, 36H), 1.34–1.78 (m, 72H), 1.95 (m, 8H), 3.22–3.27 (m, 32H), 4.25 (t,  $J = 5.8$  Hz, 8H), 7.43 (d,  $J = 7.6$  Hz, 4H), 7.71 (t,  $J = 7.6$  Hz, 4H), 7.78 (s, 8H), 9.15 ppm (s, 8H);  $^{13}\text{C}$  NMR ( $\text{CD}_3\text{OD}$ , 100 MHz, 60  $^\circ\text{C}$ )  $\delta$  14.0, 20.7, 22.9, 24.8, 26.9, 27.2, 30.3, 59.5, 59.6, 69.1, 115.0, 121.7, 122.4, 128.5, 128.9, 132.9, 144.4, 149.1, 159.1 ppm; HR-MS (ESI):  $m/z = 941.6517$ . calcd for  $\text{C}_{116}\text{H}_{180}\text{N}_8\text{O}_4\text{AlCl}_3$ : 941.6488  $[\text{M}-2\text{Cl}]^{2+}$ ; IR (KBr) 2959, 2936, 2874, 1593, 1576, 1472, 1423, 1385, 1350, 1312, 1287, 1260, 1184, 1169, 1069, 1009, 881, 799, 721, 702  $\text{cm}^{-1}$ .

### Synthesis of 4-Cl.

A solution of **4-Br** (56.1 mg, 26.3  $\mu\text{mol}$ ) in  $\text{CH}_2\text{Cl}_2$  was vigorously washed with brine ( $\times 10$ ), dried over  $\text{Na}_2\text{SO}_4$ , and evaporated. Recrystallization of the residue from  $\text{CH}_2\text{Cl}_2/\text{Et}_2\text{O}$  gave **4-Cl** (51.3 mg, 100%) as a blue-green solid.

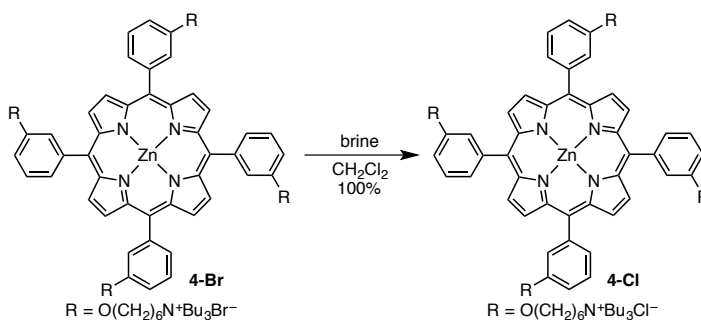

$^1\text{H}$  NMR ( $\text{CD}_3\text{OD}$ , 400 MHz, 60  $^\circ\text{C}$ )  $\delta$  0.93 (t,  $J = 6.8$  Hz, 36H), 1.22–1.69 (m, 72H), 1.87 (m, 8H), 3.10 (s, 32H), 4.19 (t,  $J = 5.8$  Hz, 8H), 7.32 (dd,  $J = 2.0, 7.6$  Hz, 4H), 7.62 (t,  $J = 7.6$  Hz, 4H), 7.74–7.82 (m, 8H), 8.88 ppm (s, 8H);  $^{13}\text{C}$  NMR ( $\text{CD}_3\text{OD}$ , 100 MHz, 60  $^\circ\text{C}$ )  $\delta$  13.8, 20.6, 22.8, 24.8, 26.7, 27.1, 30.2, 59.7, 59.8, 69.3, 114.7, 121.6, 122.9, 128.4, 128.8, 132.5, 146.1, 151.4, 158.8 ppm; HR-MS (ESI):  $m/z = 943.6397$ . calcd for  $\text{C}_{116}\text{H}_{180}\text{N}_8\text{O}_4\text{ZnCl}_2$ : 943.6394  $[\text{M}-2\text{Cl}]^{2+}$ ; IR (KBr) 2959, 2936, 2872, 1595, 1574, 1474, 1431, 1381, 1335, 1285, 1254, 1207, 1180, 1165, 1065, 1040, 1013, 995, 935, 878, 795, 745, 719, 702  $\text{cm}^{-1}$ .



## NMR spectra.

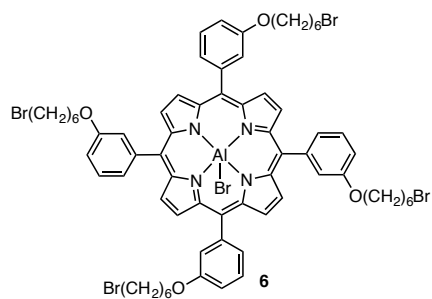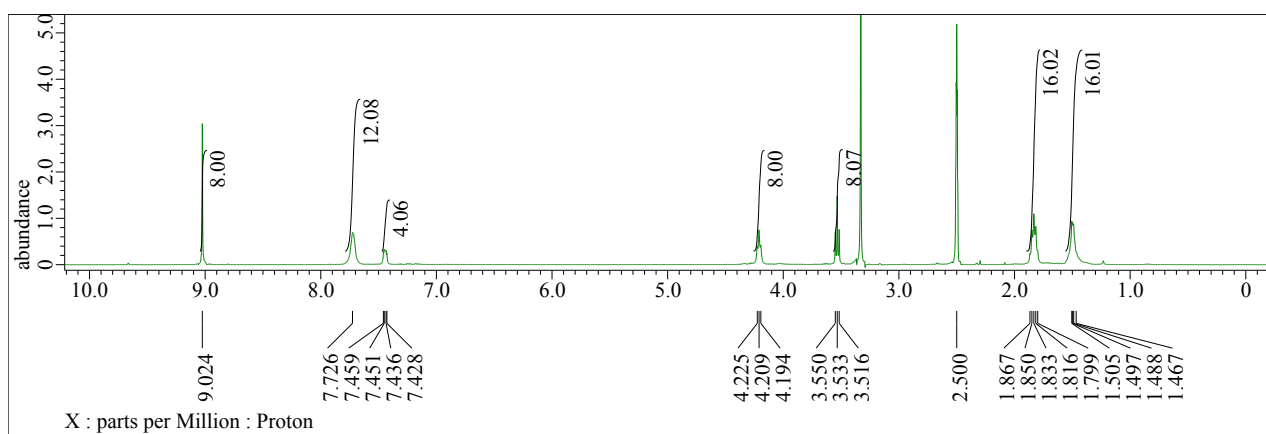

$^1\text{H}$  NMR spectrum of **6** in  $\text{DMSO}-d_6$

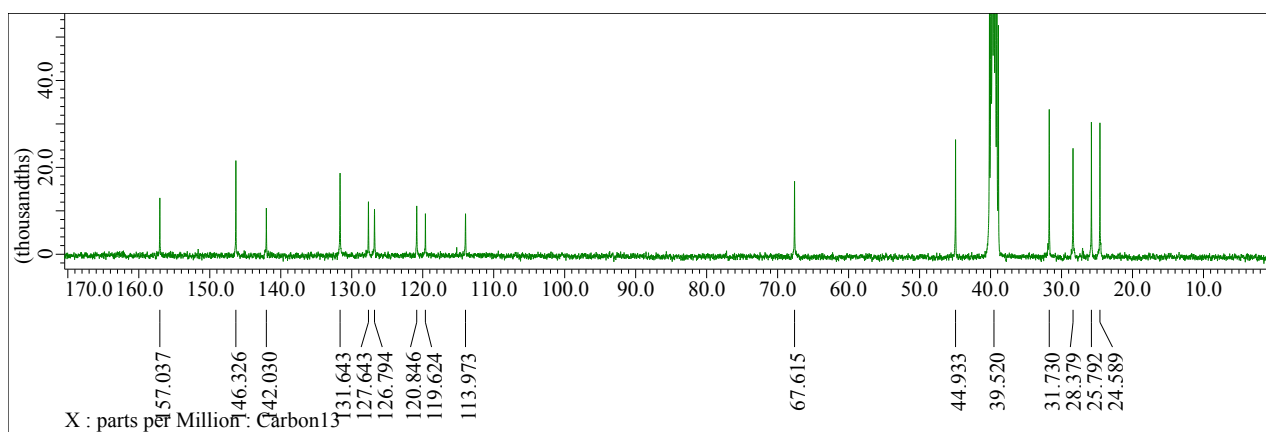

$^{13}\text{C}$  NMR spectrum of **6** in  $\text{DMSO}-d_6$  at  $60^\circ\text{C}$

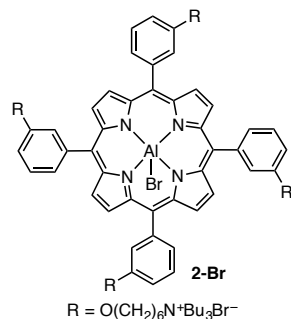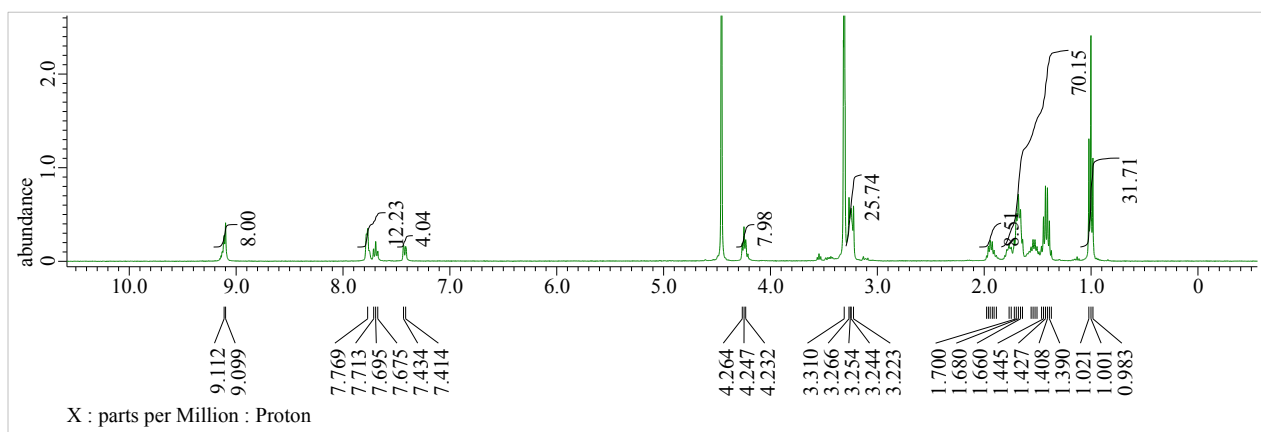

<sup>1</sup>H NMR spectrum of **2-Br** in CD<sub>3</sub>OD at 60 °C

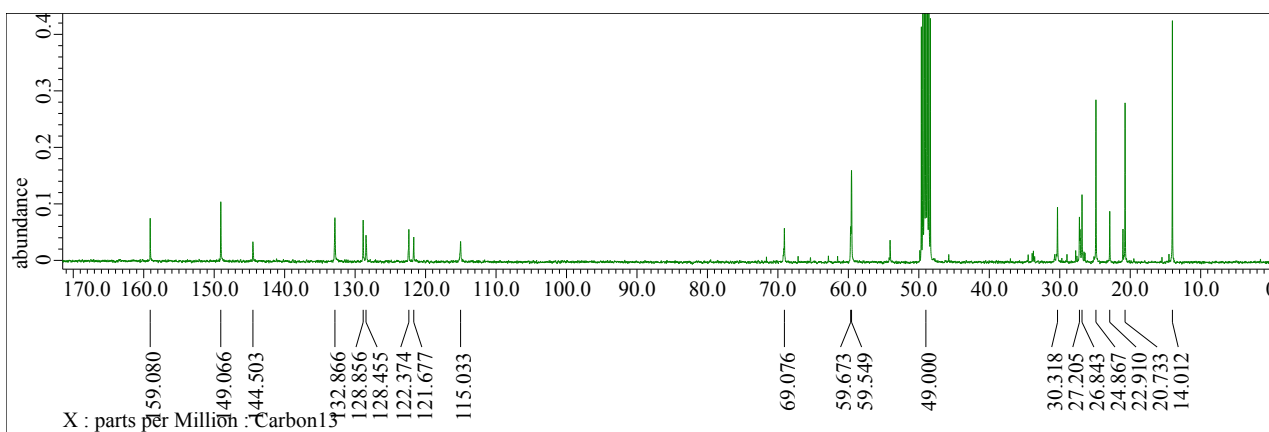

<sup>13</sup>C NMR spectrum of **2-Br** in CD<sub>3</sub>OD at 60 °C

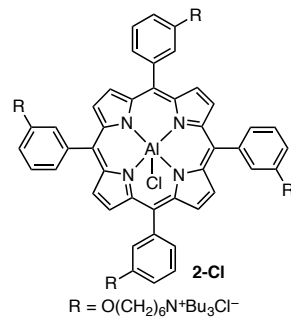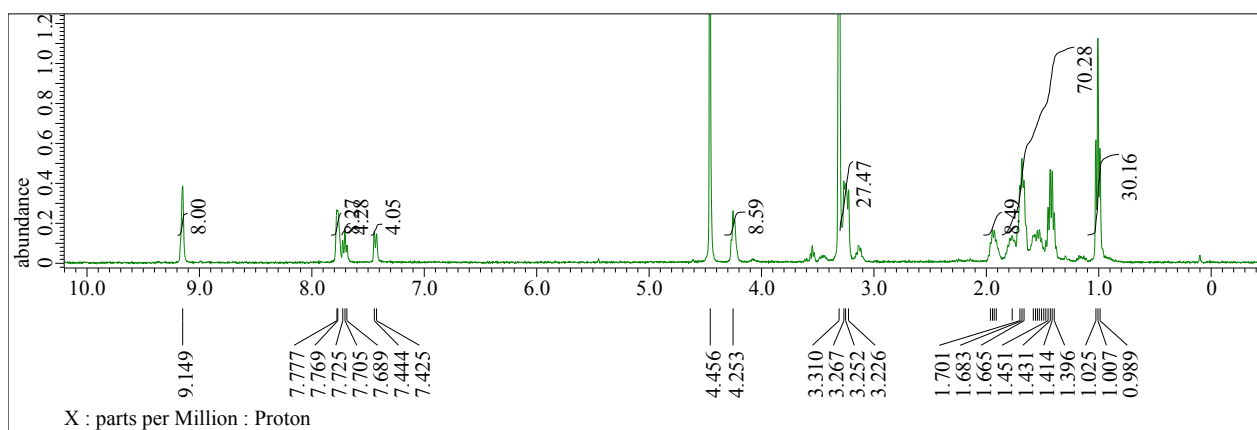

<sup>1</sup>H NMR spectrum of **2-Cl** in CD<sub>3</sub>OD at 60 °C

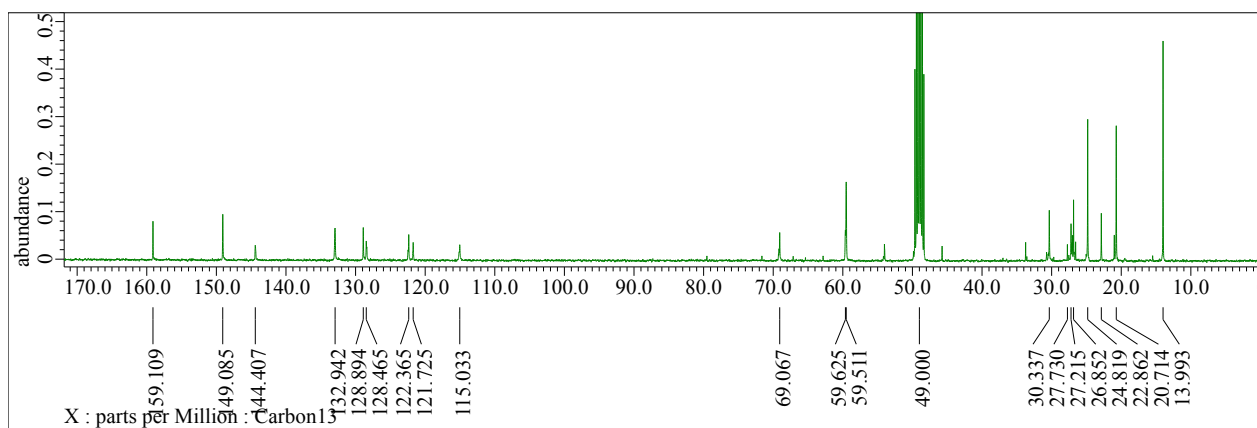

<sup>13</sup>C NMR spectrum of **2-Cl** in CD<sub>3</sub>OD at 60 °C

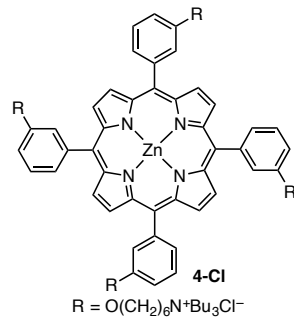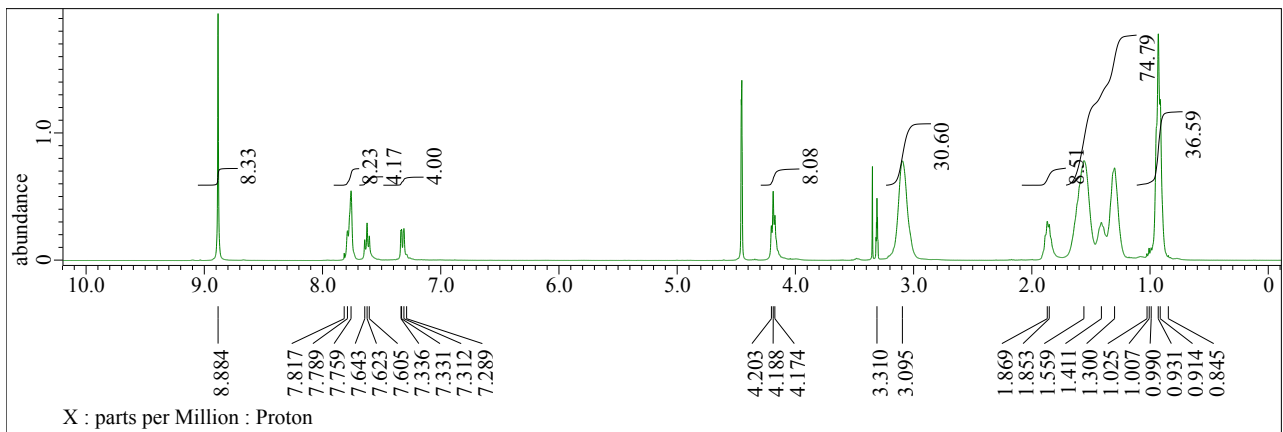

<sup>1</sup>H NMR spectrum of **4-Cl** in CD<sub>3</sub>OD at 60 °C

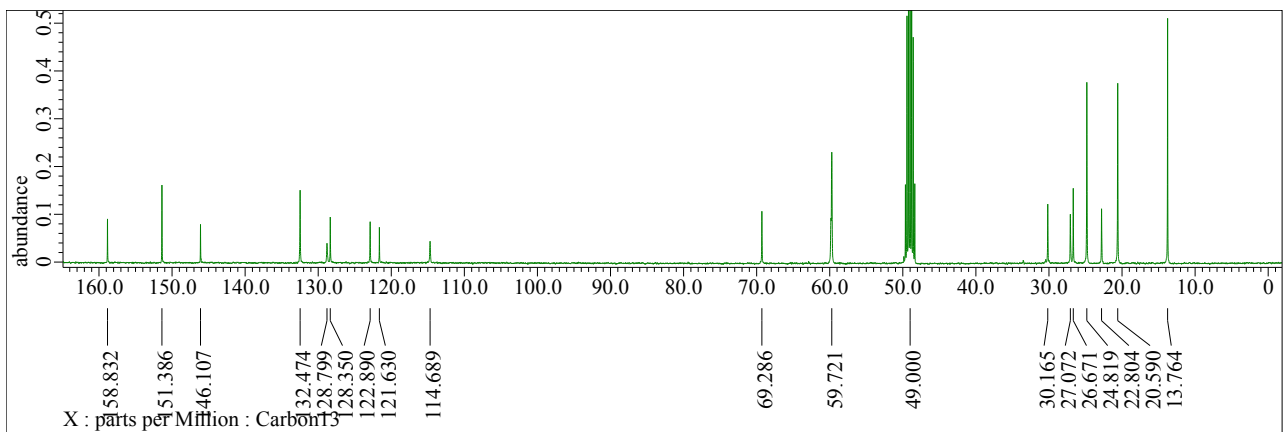

<sup>13</sup>C NMR spectrum of **4-Cl** in CD<sub>3</sub>OD at 60 °C

### [3] Copolymerization reactions.

**General procedure.** CHO was added to the catalyst (and co-catalyst if necessary) in an autoclave (preheated at 150 °C for 1 h and cooled down in vacuo) equipped with a Teflon stirring bar. The autoclave was then pressurized with 2.0 MPa of CO<sub>2</sub>. The reaction mixture was stirred at specified temperature for a specified period of time. The reactor was cooled down to ambient temperature and vented in a fume hood. The resulting mixture was vacuumed to remove the residual CHO. The remaining mixture was dissolved in CHCl<sub>3</sub>, and 0.5 M HCl in MeOH (0.2 mL) was added. Phenanthrene was added as an internal standard for the <sup>1</sup>H NMR measurement. The solution was then evaporated to dryness with heating. A small portion of the mixture was used for <sup>1</sup>H NMR and SEC analysis.

**NMR analysis.** TON and selectivity (carbonate linkages vs ether linkages and cyclic carbonate) were calculated from <sup>1</sup>H NMR spectra of the crude reaction mixture, using the integration of the methylene resonances for PCHC (4.65 ppm), ether linkage in the copolymer chain (3.45 ppm), and *trans*-CHC (4.0 ppm). TON of the catalyst for the PCHC formation was calculated as the number of moles of PCHC linkages divided by the number of moles of the catalyst, and the TOF was calculated as TON per hour, based on the relative integral to phenanthrene (internal standard).

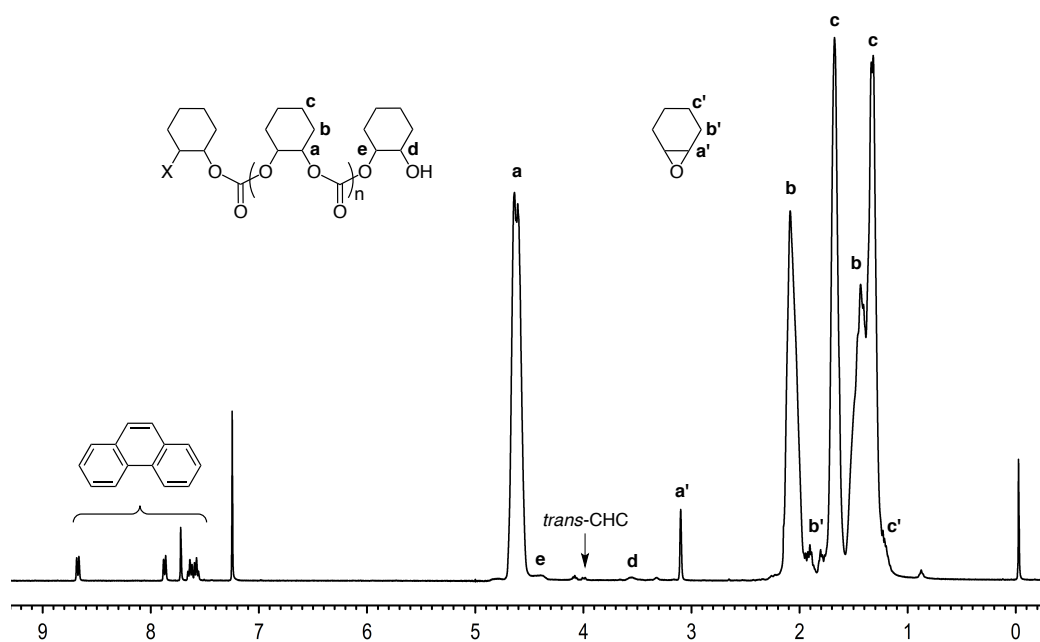

**Fig. S1** Example of <sup>1</sup>H NMR spectrum (500 MHz, CDCl<sub>3</sub>, 25 °C) of as-prepared PCHC. Signals at 4.64 ppm are assigned to the methine groups of PCHC. Signals at 4.4 ppm and 3.6 ppm are assigned to the end-group H<sub>e</sub> and H<sub>d</sub>, respectively, which are hardly detected in the case of PCHC with molecular weight exceeding 60,000. A trace amount of *trans*-CHC is detected at 4.0 ppm. Residual CHO signals can also be seen.

SEC charts.

Table 1, entry 1:

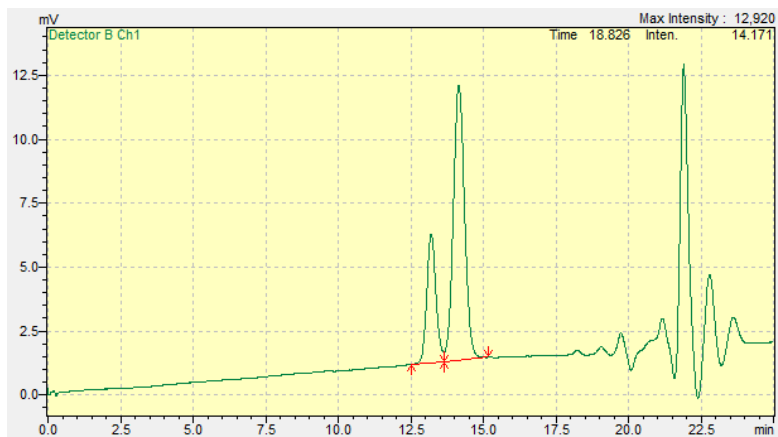

| peak | $M_n$  | $M_w$  | $M_w/M_n$ | %       |
|------|--------|--------|-----------|---------|
| 1    | 68,355 | 69,575 | 1.01784   | 27.8058 |
| 2    | 31,662 | 32,347 | 1.02163   | 72.1942 |

Table 1, entry 2:

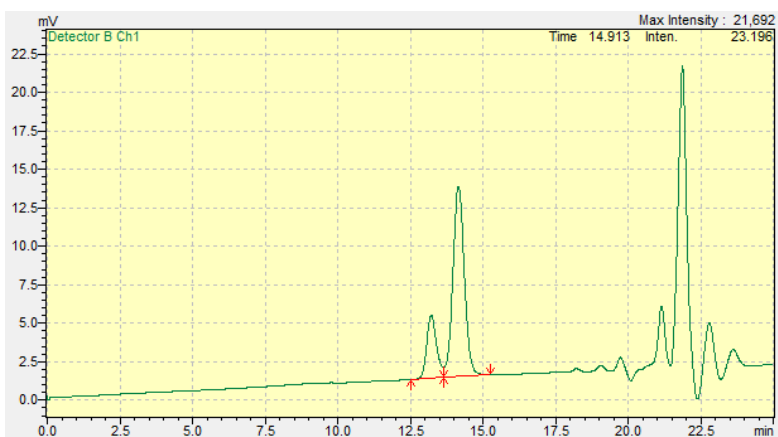

| peak | $M_n$  | $M_w$  | $M_w/M_n$ | %       |
|------|--------|--------|-----------|---------|
| 1    | 66,549 | 67,866 | 1.01979   | 22.2695 |
| 2    | 31,486 | 32,228 | 1.02355   | 77.7305 |

**Table 1, entry 3:**

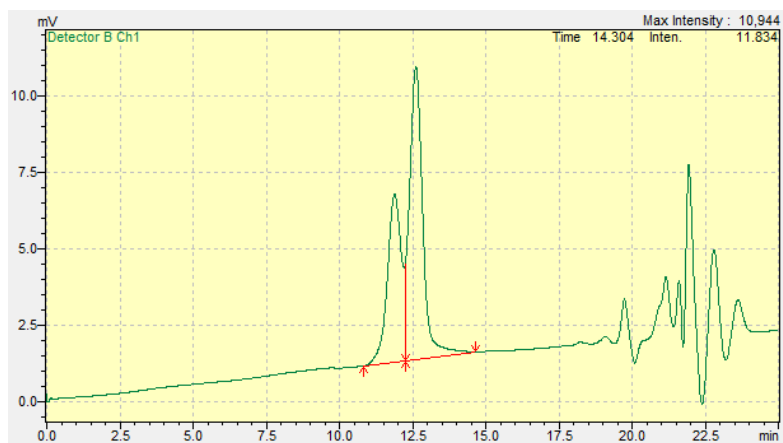

| peak | $M_n$   | $M_w$   | $M_w/M_n$ | %       |
|------|---------|---------|-----------|---------|
| 1    | 231,820 | 244,539 | 1.05487   | 38.2428 |
| 2    | 106,426 | 113,841 | 1.06967   | 61.7572 |

**Table 1, entry 4:**

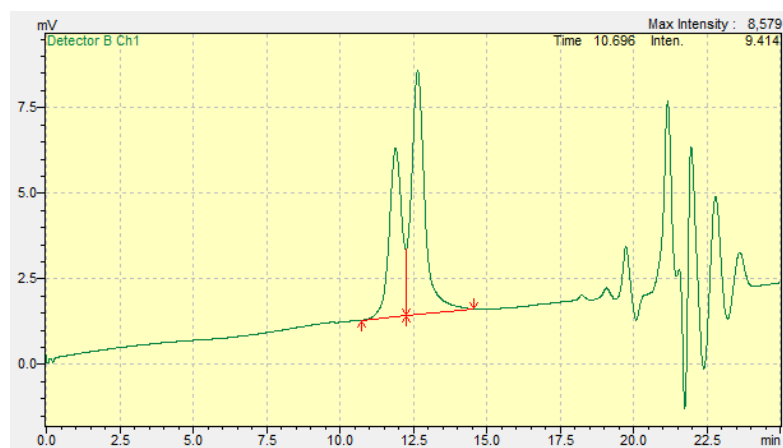

| peak | $M_n$   | $M_w$   | $M_w/M_n$ | %       |
|------|---------|---------|-----------|---------|
| 1    | 228,598 | 238,695 | 1.04417   | 39.0340 |
| 2    | 100,776 | 108,793 | 1.07956   | 60.966  |

**Table 1, entry 5:**

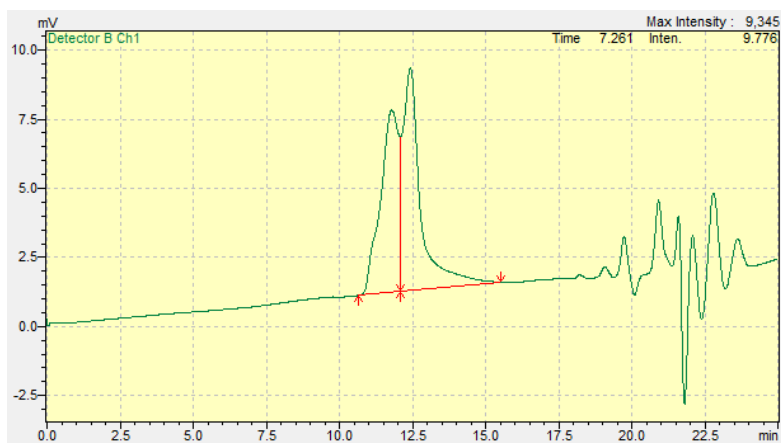

| peak | $M_n$   | $M_w$   | $M_w/M_n$ | %       |
|------|---------|---------|-----------|---------|
| 1    | 280,528 | 305,196 | 1.08793   | 45.2750 |
| 2    | 96,227  | 122,303 | 1.27099   | 54.7250 |

**Table 1, entry 6:**

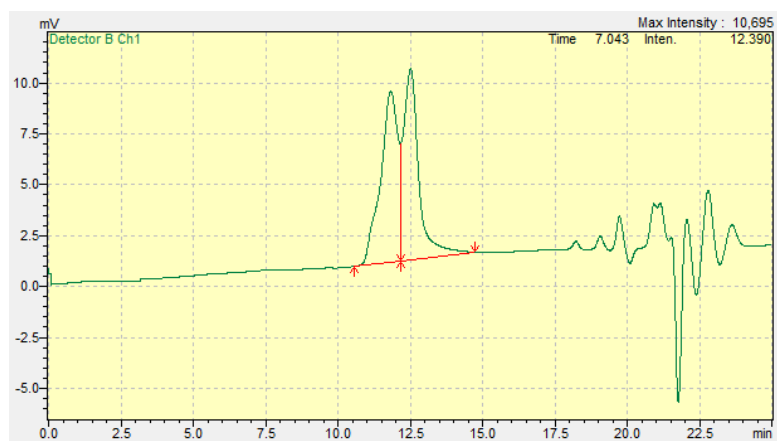

| peak | $M_n$   | $M_w$   | $M_w/M_n$ | %       |
|------|---------|---------|-----------|---------|
| 1    | 263,075 | 286,476 | 1.08895   | 50.0933 |
| 2    | 107,744 | 120,742 | 1.12064   | 49.9067 |



Table 1, entry 7:

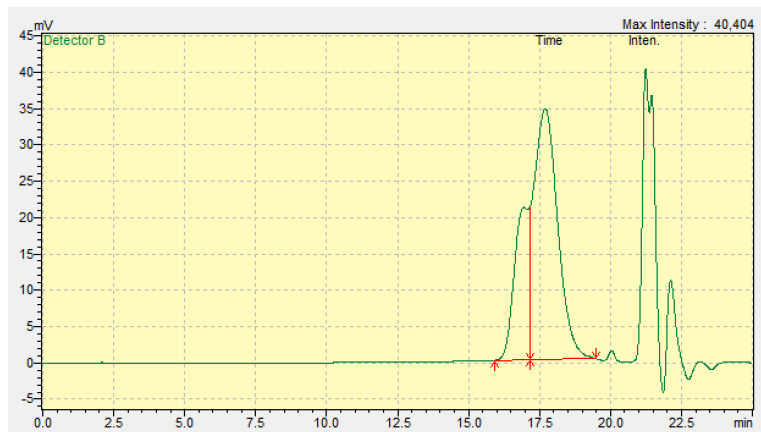

| peak | $M_n$ | $M_w$ | $M_w/M_n$ | %       |
|------|-------|-------|-----------|---------|
| 1    | 3,928 | 4,057 | 1.03301   | 27.8884 |
| 2    | 1,615 | 1,833 | 1.13528   | 72.1116 |

# MALDI-TOF mass spectrum of polymers.

(a)

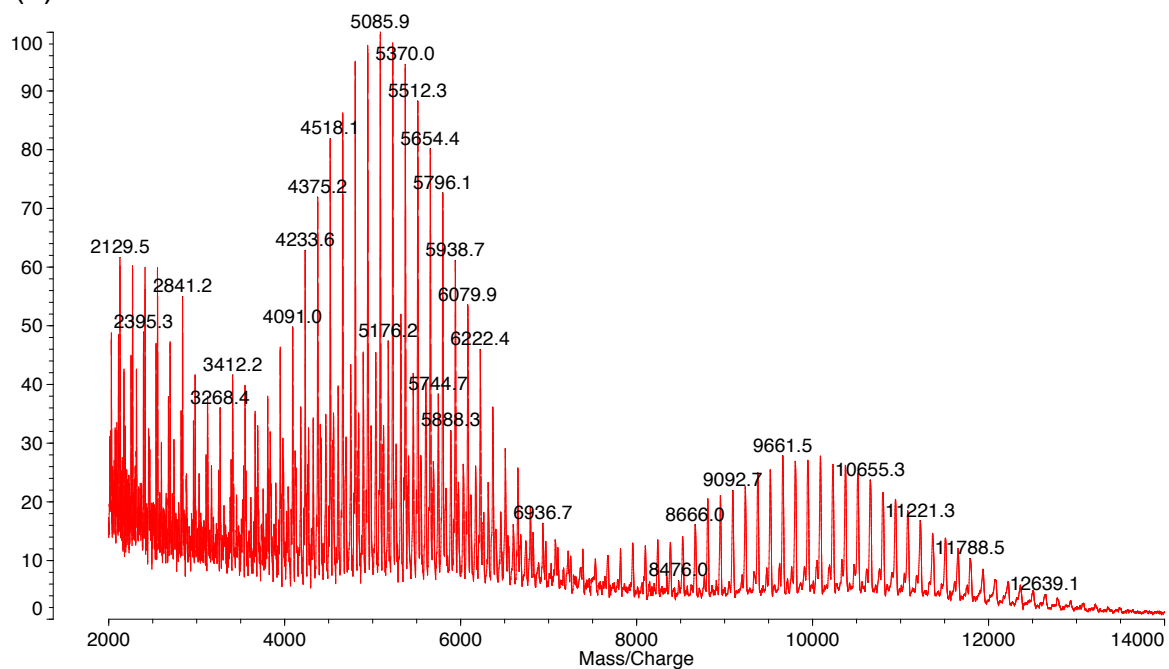

(b)

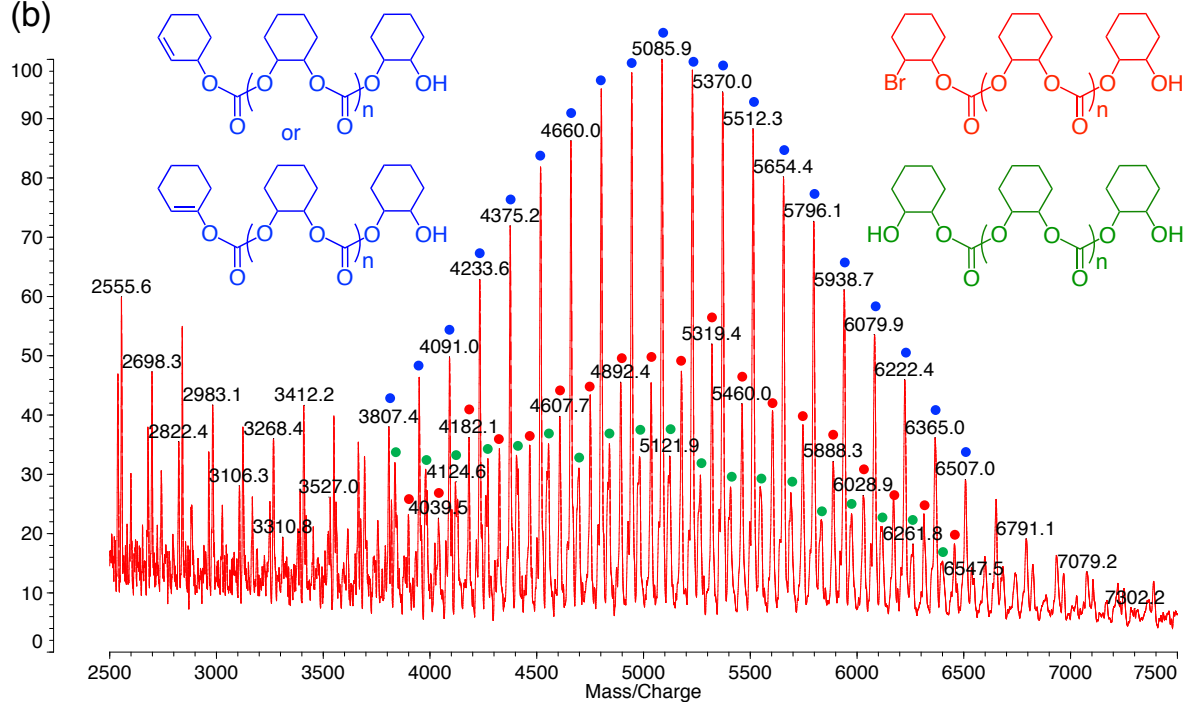

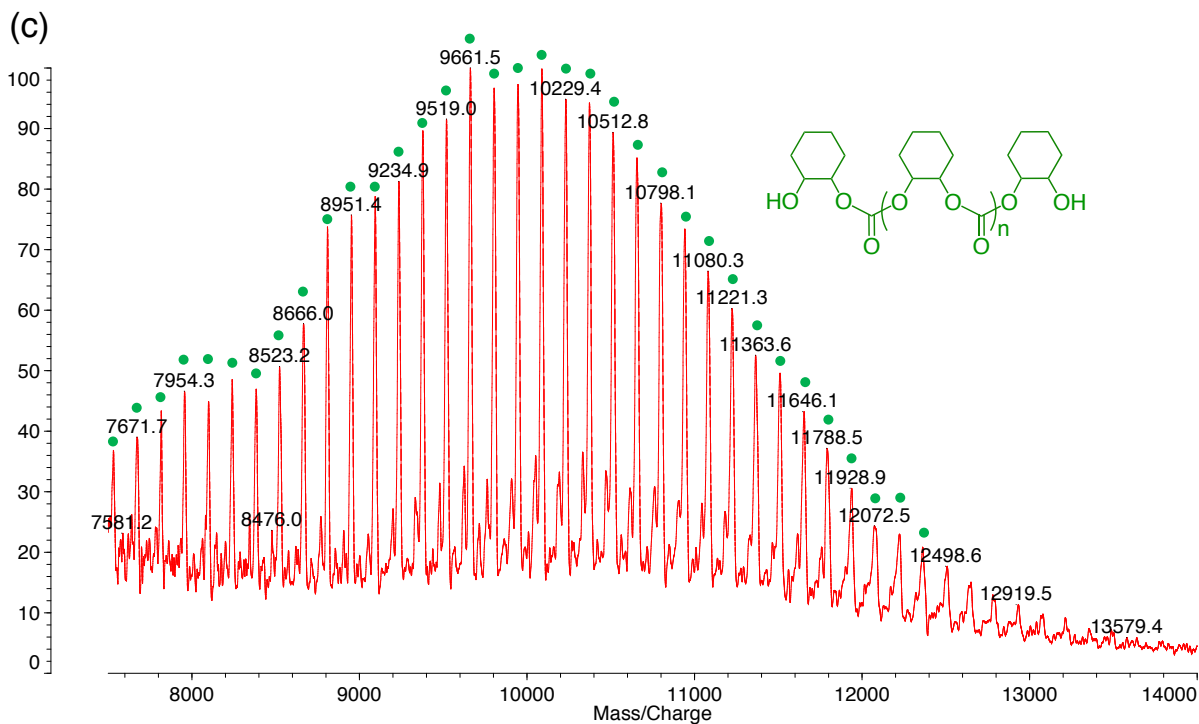

**Fig. S2** The MALDI-TOF mass spectrum of PCHC synthesized with **2-Br**. Reaction conditions: CHO (10 mmol), **2-Br** (0.02 mol%), CO<sub>2</sub> (3.0 MPa), 70 °C, 14 h. Mass analysis conditions: dithranol (matrix), sodium trifluoroacetate (cation source), THF. (a) The whole spectrum. (b) The expanded spectrum of the lower-molecular-weight region. (c) The expanded spectrum of the higher-molecular-weight region. The peaks are assigned with the deduced polymer structures.

The MALDI-TOF mass spectrum of PCHC shows a bimodal molecular weight distribution. The lower-molecular-weight polymers have the OH group at one end and either OH, Br, or alkene at the other end, which suggests that the initiator, Br<sup>-</sup>, can be regenerated from the chain end. On the other hand, the higher-molecular-weight polymers have the OH groups at both chain ends. This means that the higher-molecular-weight polymers were produced with cyclohexane-1,2-diol generated *in situ* by the reaction of CHO with a trace amount of water (impurity); cyclohexane-1,2-diol acted as a chain transfer agent to enable the polymer chain elongation on both sides, giving the higher-molecular-weight polymers that were approximately two-fold longer than the lower-molecular-weight polymers.

#### [4] Kinetic experiments.

**Kinetic experiments with real-time IR.** Since catalyst **2** was highly active, only a small amount of catalyst was enough for conducting the kinetic experiments. A solution of catalyst **2** in  $\text{CH}_2\text{Cl}_2$  was prepared to take the catalyst more correctly. The reactor was equipped with a syringe port valve for liquid introduction, a valve for applying vacuum or inert gas and  $\text{CO}_2$  introduction, as well as a pressure gauge and safety rupture disk. The reaction temperature was regulated by a standard oil bath. An autoclave (100 mL) equipped with IR probe, internal glass vial and magnetic stirring bar was charged with specified catalyst with or without co-catalyst. After flushed with  $\text{N}_2$ , diglyme was added via syringe to the autoclave while a slight countercurrent of  $\text{N}_2$  was maintained. After addition of diglyme, the reaction vessel was heated to specified temperature and flushed with  $\text{CO}_2$ . A specified amount of CHO was then added to the autoclave through the syringe port valve. After sealing the reactor, the  $\text{CO}_2$  pressure was immediately adjusted to the specified value, while low-frequency stirring was initiated to support  $\text{CO}_2$  dissolution. This process was repeated several times until the  $\text{CO}_2$  dissolution reached equilibrium with a constant pressure. Profiles of the absorbance height at  $1750\text{ cm}^{-1}$  (PCHC, C=O stretching) were measured every 120 s (256 scans were integrated) and monitored during the reaction. After appropriate reaction time, the autoclave was cooled in a water bath for 30 min, and the pressure was then released.

**Real-time IR data treatment.** Background was measured before experiment under air. A calibration curve to demonstrate a linear response of absorbance to concentrations was obtained. The peak height of the polycarbonate signal at  $1750\text{ cm}^{-1}$  was found to increase linearly with the concentration in the diglyme solution. Initial rates were determined as the slope of fits to plots of infrared absorption a.u. vs time (min) in the range of 3–10% CHO conversion.

### Determination of reaction order.

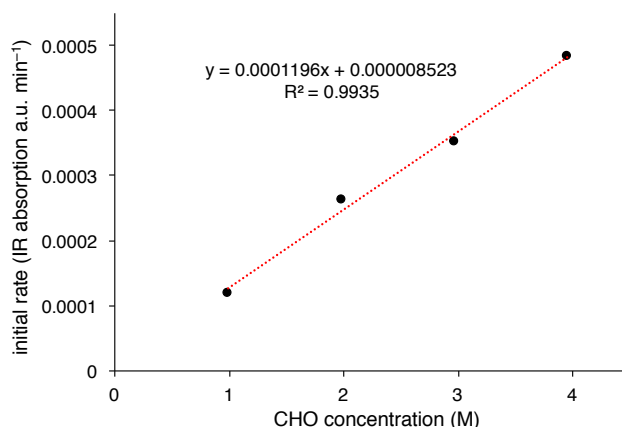

**Fig. S3** Plot of initial rates of copolymerization vs different CHO concentrations (0.988, 1.98, 2.96, and 3.95 M) in diglyme at 68 °C with [2-Br] = 0.055 mM and 20 bar of CO<sub>2</sub>.

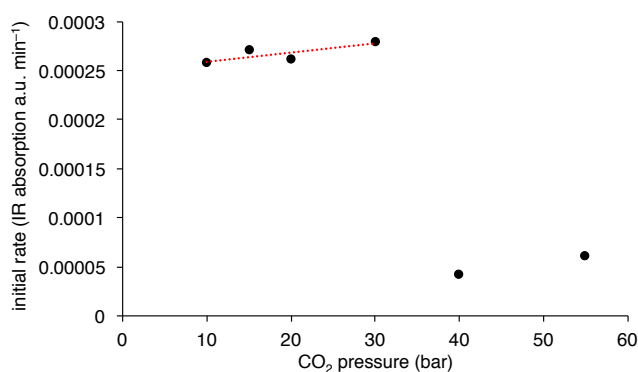

**Fig. S4** Plot of initial rates of copolymerization vs different CO<sub>2</sub> pressures (10, 15, 20, 30, 40, and 55 bar) in diglyme at 68 °C with [2-Br] = 0.055 mM and [CHO] = 1.98 M. (The initial rates dropped at 40–55 bar presumably because of the precipitation of 2-Br.)

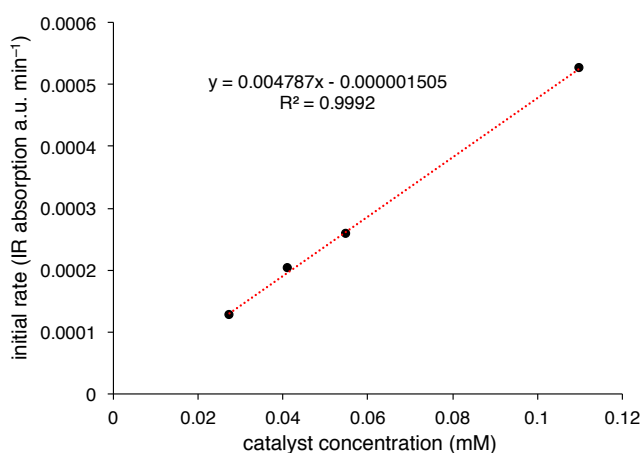

**Fig. S5** Plot of initial rates of copolymerization vs different catalyst (2-Br) concentrations (0.0276, 0.0413, 0.0551, and 0.110 mM) in diglyme at 68 °C with initial [CHO] = 1.98 M and 20 bar of CO<sub>2</sub>.

### Arrhenius plot for the formation of PCHC with 1-Br/PPNBr.

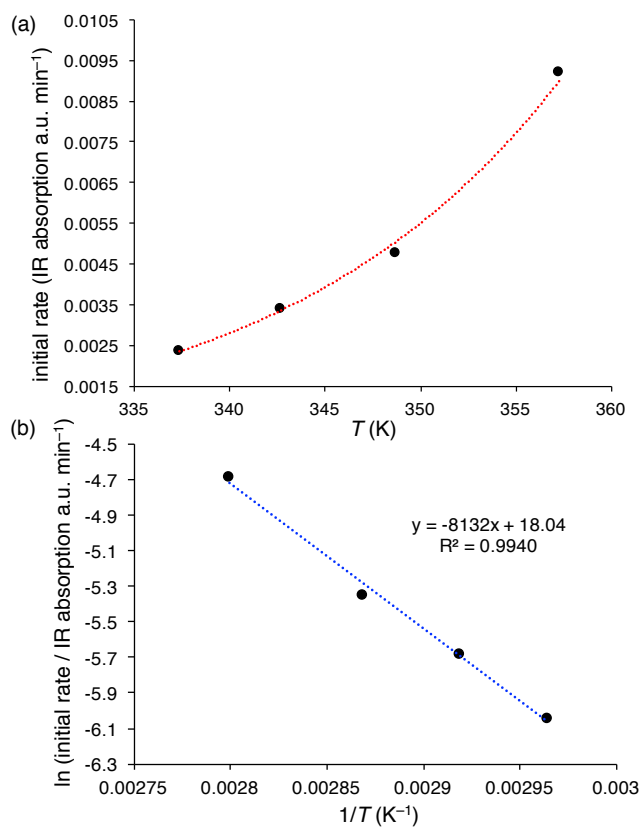

**Fig. S6** (a) Plot of initial rates of copolymerization vs different reaction temperatures (337, 343, 349, and 357 K) in diglyme with [1-Br] = 2.40 mM, [PPNBr] = 4.80 mM, [CHO] = 4.94 M, and a CO<sub>2</sub> pressure of 20 bar. (b) Arrhenius plot for the formation of PCHC with 1-Br/PPNBr.

### Eyring plot for the formation of PCHC with 2-Br.

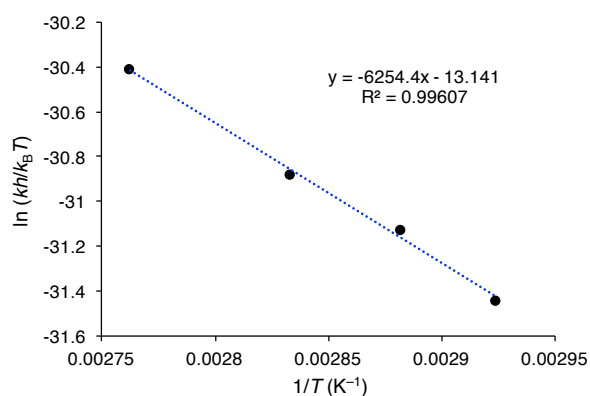

**Fig. S7** Eyring plot for the formation of PCHC with 2-Br.

## [5] Computational details.

Monosubstituted Al<sup>III</sup> complex **2'** and Mg<sup>II</sup> complex **3'** (Fig. 3) were employed as model catalysts for **2-Br** and **3-Br**, respectively, while CHO was used as a substrate. DFT calculations were performed along the proposed reaction pathway (Scheme 2). Computations were performed with Gaussian 16 program<sup>S2</sup> at the  $\omega$ B97XD<sup>S3</sup>/6-31G\* level.<sup>S4</sup> The self-consistent reaction field (SCRF) method with the polarizable continuum model (PCM)<sup>S5</sup> was used to take into account of the solvation effect (Et<sub>2</sub>O). Harmonic frequency and normal mode were calculated to verify the transition-state structures. Natural population analysis (NPA)<sup>S6</sup> was done to calculate the natural atomic charges.

## References

- (S2) *Gaussian 16, Revision A.03*, M. J. Frisch, G. W. Trucks, H. B. Schlegel, G. E. Scuseria, M. A. Robb, J. R. Cheeseman, G. Scalmani, V. Barone, G. A. Petersson, H. Nakatsuji, X. Li, M. Caricato, A. V. Marenich, J. Bloino, B. G. Janesko, R. Gomperts, B. Mennucci, H. P. Hratchian, J. V. Ortiz, A. F. Izmaylov, J. L. Sonnenberg, D. Williams-Young, F. Ding, F. Lipparini, F. Egidi, J. Goings, B. Peng, A. Petrone, T. Henderson, D. Ranasinghe, V. G. Zakrzewski, J. Gao, N. Rega, G. Zheng, W. Liang, M. Hada, M. Ehara, K. Toyota, R. Fukuda, J. Hasegawa, M. Ishida, T. Nakajima, Y. Honda, O. Kitao, H. Nakai, T. Vreven, K. Throssell, J. A. Montgomery, Jr., J. E. Peralta, F. Ogliaro, M. J. Bearpark, J. J. Heyd, E. N. Brothers, K. N. Kudin, V. N. Staroverov, T. A. Keith, R. Kobayashi, J. Normand, K. Raghavachari, A. P. Rendell, J. C. Burant, S. S. Iyengar, J. Tomasi, M. Cossi, J. M. Millam, M. Klene, C. Adamo, R. Cammi, J. W. Ochterski, R. L. Martin, K. Morokuma, O. Farkas, J. B. Foresman and D. J. Fox, Gaussian, Inc., Wallingford, CT, 2016.
- (S3) J.-D. Chai and M. Head-Gordon, *Phys. Chem. Chem. Phys.*, 2008, **10**, 6615.
- (S4) (a) W. J. Hehre, R. Ditchfield and J. A. Pople, *J. Chem. Phys.*, 1972, **56**, 2257; (b) P. C. Hariharan and J. A. Pople, *Theor. Chim. Acta*, 1973, **28**, 213.
- (S5) (a) S. Miertuš, E. Scrocco and J. Tomasi, *Chem. Phys.*, 1981, **55**, 117; (b) B. Mennucci and J. Tomasi, *J. Chem. Phys.*, 1997, **106**, 5151; (c) R. Cammi, B. Mennucci and J. Tomasi, *J. Phys. Chem. A*, 2000, **104**, 5631.
- (S6) (a) A. E. Reed and F. Weinhold, *J. Chem. Phys.*, 1983, **78**, 4066; (b) A. E. Reed, R. B. Weinstock and F. Weinhold, *J. Chem. Phys.*, 1985, **83**, 735.

[6] Intermediate and transition-state structures.

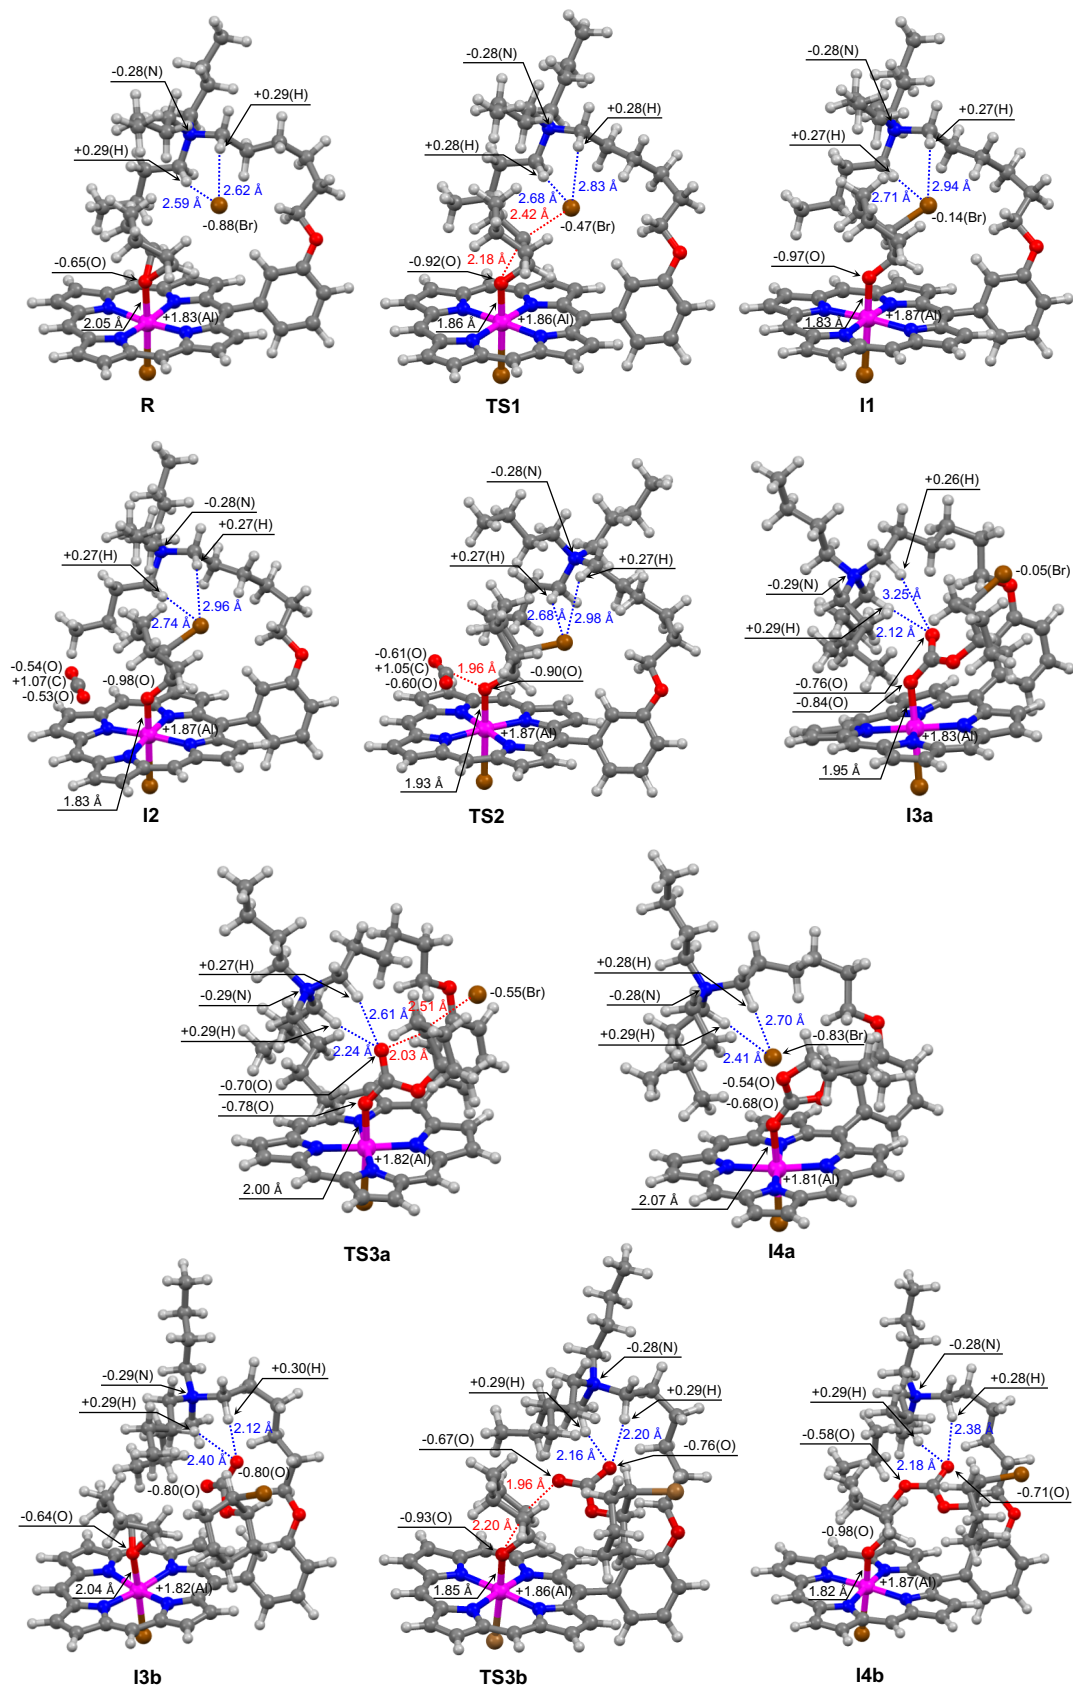

**Fig. S8** Optimized intermediate and transition-state structures with Al<sup>III</sup> complex 2' in the potential energy profile (Fig. 3).



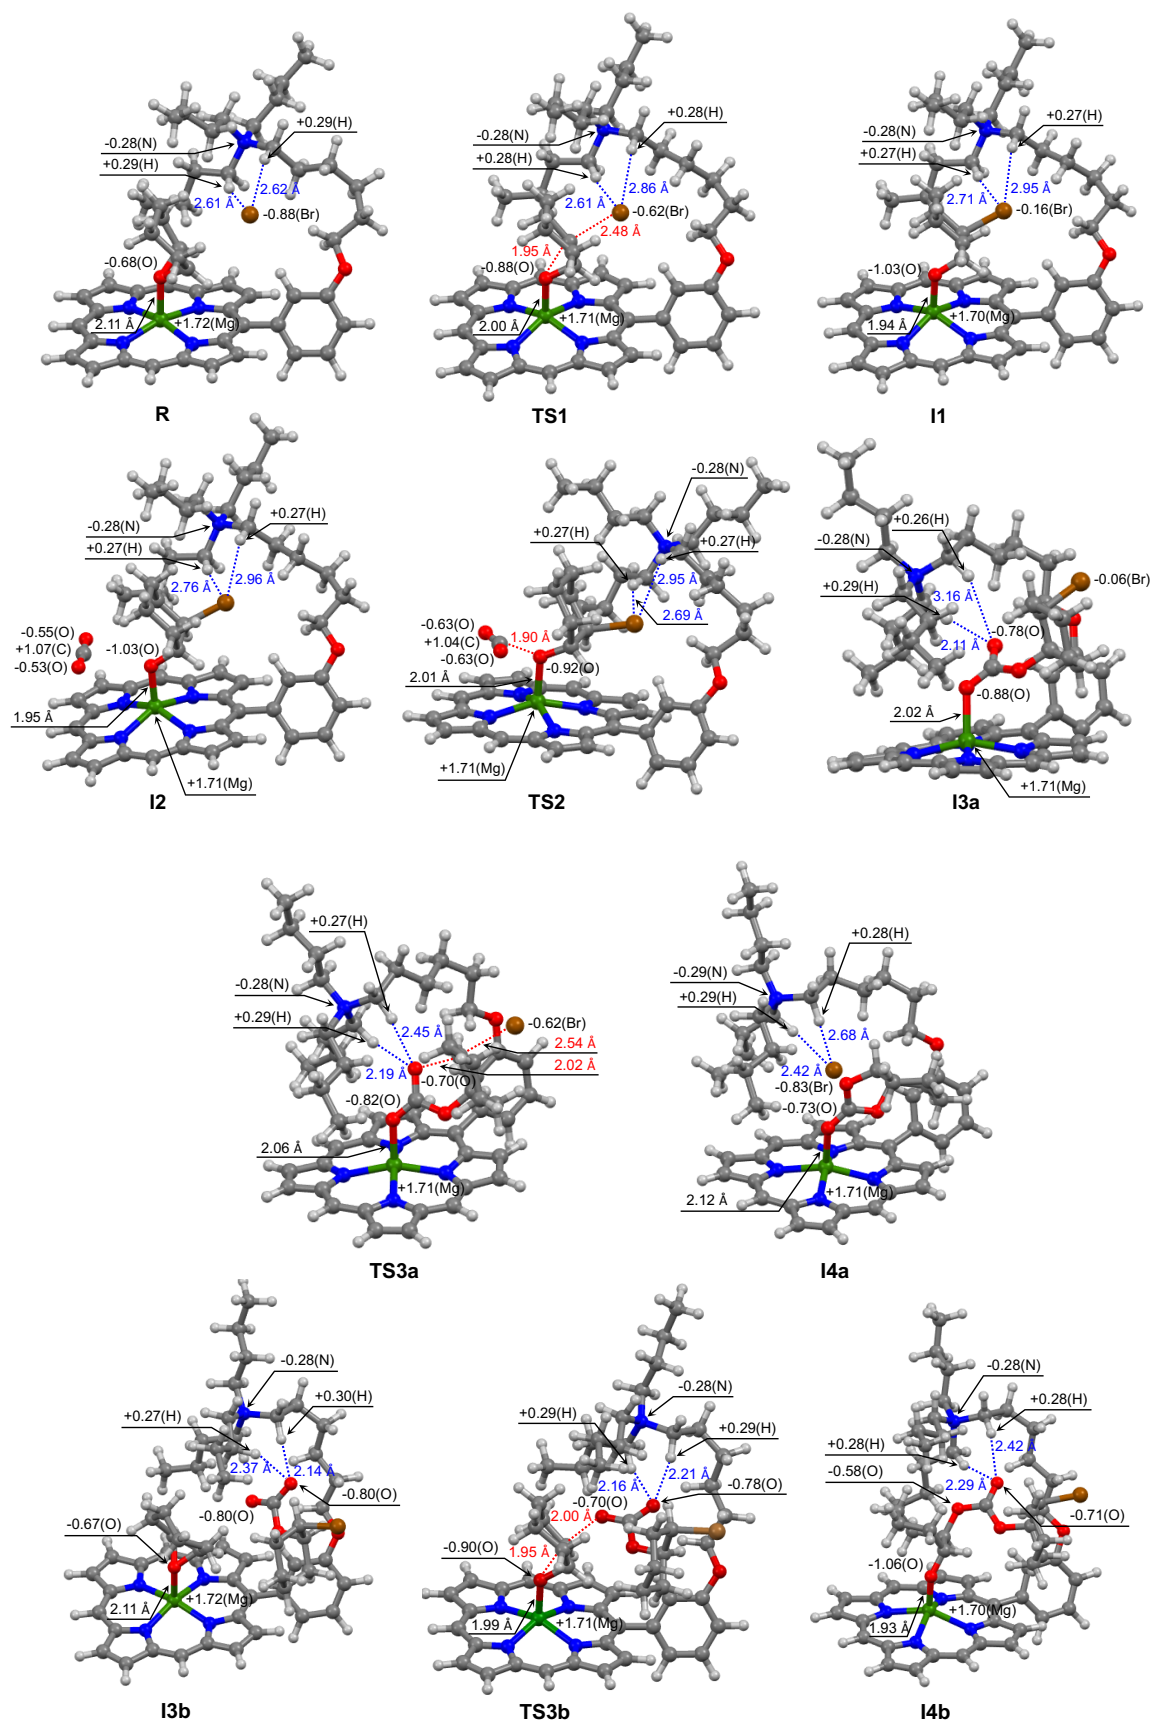

**Fig. S9** Optimized intermediate and transition-state structures with Mg<sup>II</sup> complex 3' in the potential energy profile (Fig. 3).

[7] Comparison between 1,2-diaxial and 1,2-diequatorial conformations.

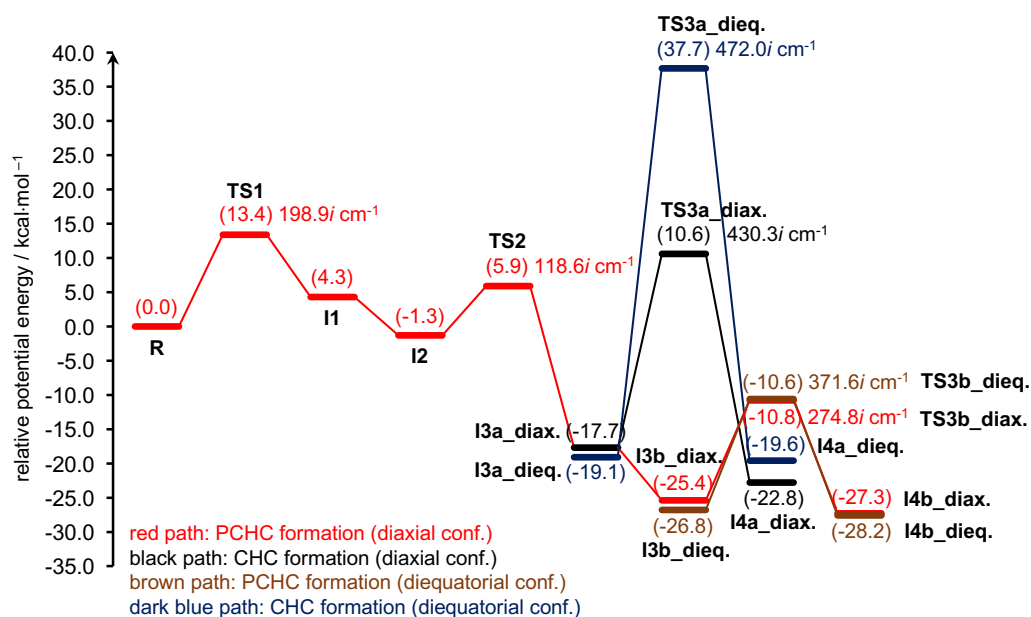

**Fig. S10** Potential energy profiles for comparison between 1,2-diaxial and 1,2-diequatorial conformations with Al<sup>III</sup> complex **2'**. Computations were performed at the  $\omega$ B97XD/6-31G\* level with the SCRf method (Et<sub>2</sub>O).

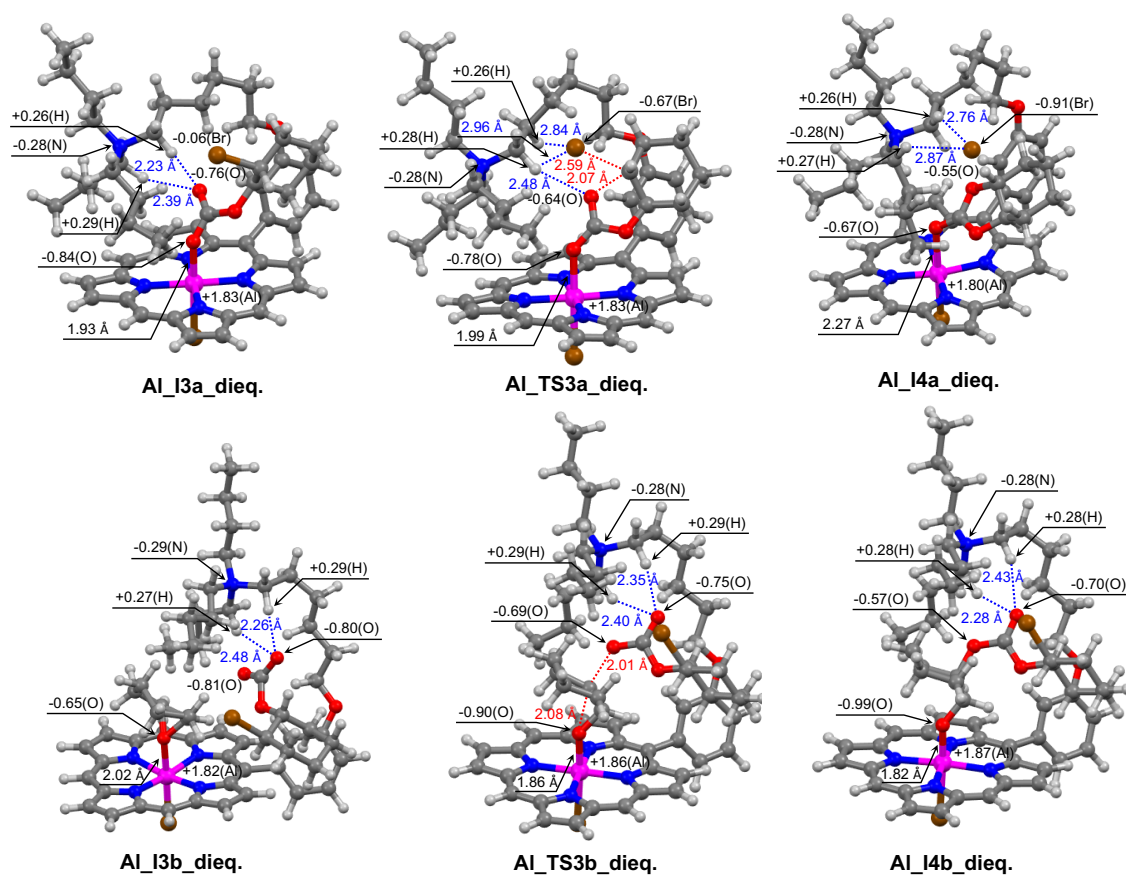

**Fig. S11** Optimized intermediate and transition-state structures in the 1,2-diequatorial conformations with Al<sup>III</sup> complex **2'** (Fig. S10).

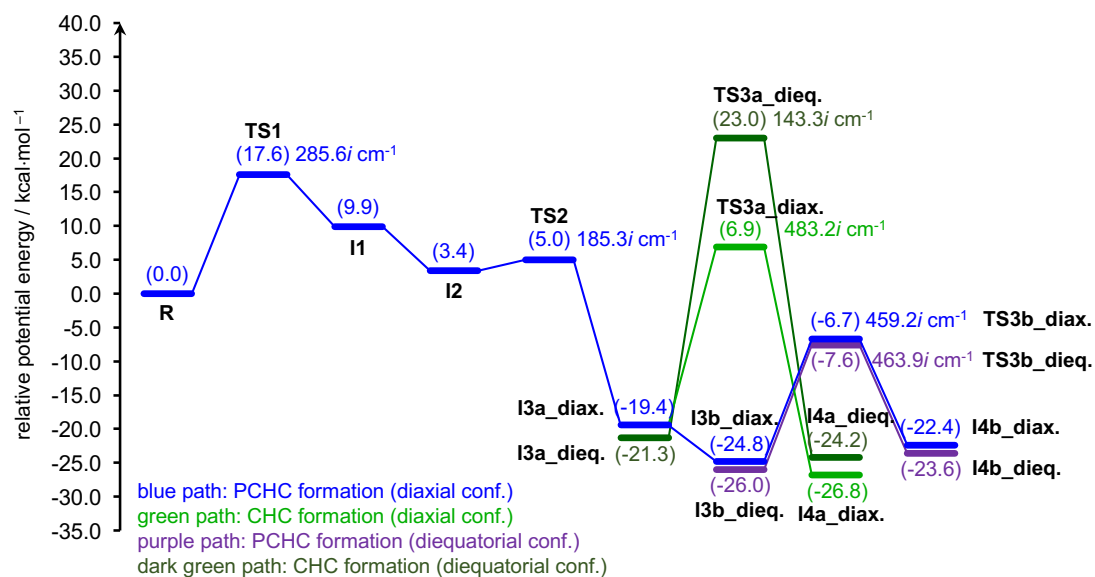

**Fig. S12** Potential energy profiles for comparison between 1,2-diaxial and 1,2-diequatorial conformations with Mg<sup>II</sup> complex **3'**. Computations were performed at the  $\omega$ B97XD/6-31G\* level with the SCRf method (Et<sub>2</sub>O).

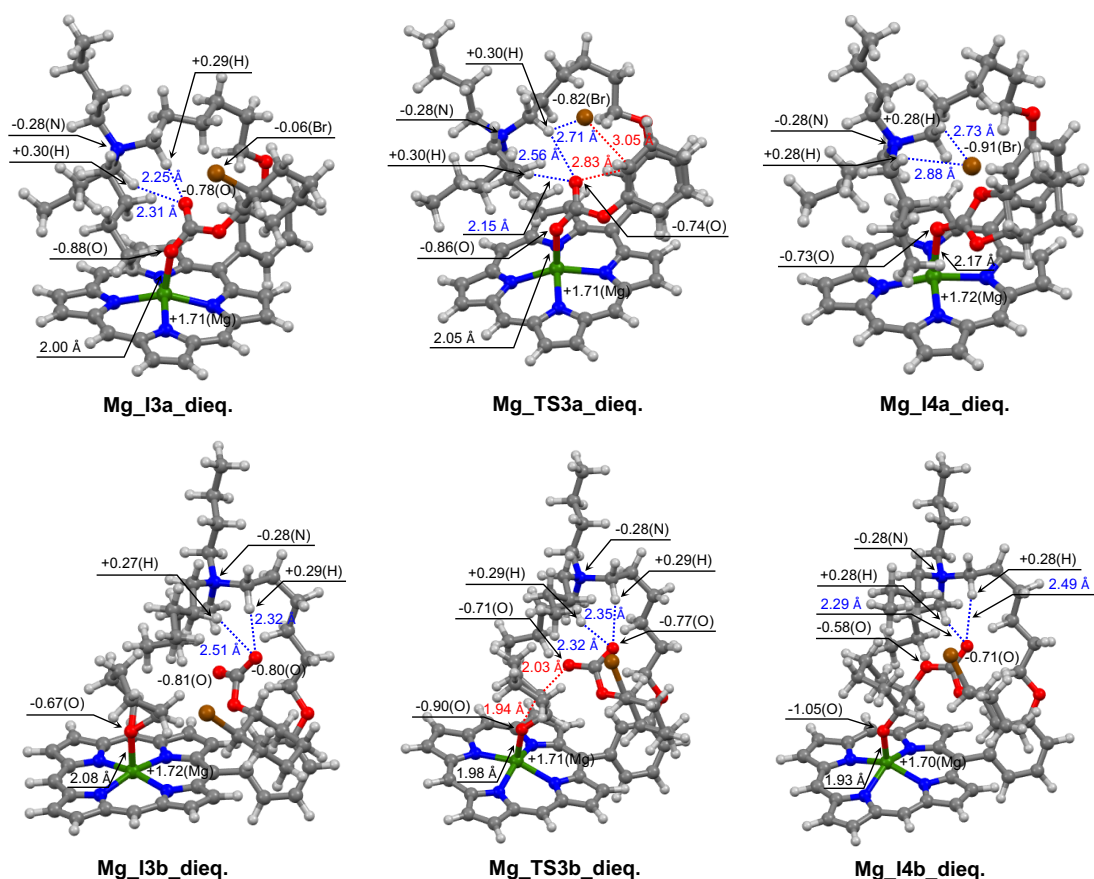

**Fig. S13** Optimized intermediate and transition-state structures in the 1,2-diequatorial conformations with Mg<sup>II</sup> complex **3'** (Fig. S12).

The 1,2-diaxial and 1,2-diequatorial conformations are compared. The intermediate and transition-state structures in the 1,2-diaxial conformations with Al<sup>III</sup> complex **2'** are shown in Fig. S8, while the corresponding 1,2-diequatorial conformations are shown in Fig. S11. The energy differences between the 1,2-diaxial and 1,2-diequatorial conformations in **I3a**, **I3b**, **TS3b**, and **I4b** are 1.4, 1.4, 0.2, and 0.9 kcal mol<sup>-1</sup>, respectively (Fig. S10). The energy barrier in the CHC formation step is much higher in the 1,2-diequatorial conformation ( $E_a = 56.8$  kcal mol<sup>-1</sup>) than in the 1,2-diaxial conformation ( $E_a = 28.3$  kcal mol<sup>-1</sup>). This is because the front-side attack occurs in the 1,2-diequatorial conformation (Fig. S11). Importantly, the activation energy in the carbonate linkage formation step (**TS3b**) is lower in the 1,2-diaxial conformation ( $E_a = 14.6$  kcal mol<sup>-1</sup>) than in the 1,2-diequatorial conformation ( $E_a = 16.2$  kcal mol<sup>-1</sup>) (Fig. S10).

The intermediate and transition-state structures in the 1,2-diaxial conformations with Mg<sup>II</sup> complex **3'** are shown in Fig. S9, while the corresponding 1,2-diequatorial conformations are shown in Fig. S13. The energy differences between the 1,2-diaxial and 1,2-diequatorial conformations in **I3a**, **I3b**, **TS3b**, and **I4b** are 1.9, 1.2, 0.9, and 1.2 kcal mol<sup>-1</sup>, respectively (Fig. S12). The energy barrier in the CHC formation step is again much higher in the 1,2-diequatorial conformation ( $E_a = 44.3$  kcal mol<sup>-1</sup>) than in the 1,2-diaxial conformation ( $E_a = 26.3$  kcal mol<sup>-1</sup>). In the carbonate linkage formation step (**TS3b**), the activation energy is slightly lower in the 1,2-diaxial conformation ( $E_a = 18.1$  kcal mol<sup>-1</sup>) than in the 1,2-diequatorial conformation ( $E_a = 18.4$  kcal mol<sup>-1</sup>) (Fig. S12).

[8] Energy for ring flip from 1,2-diaxial to 1,2-diequatorial conformations.

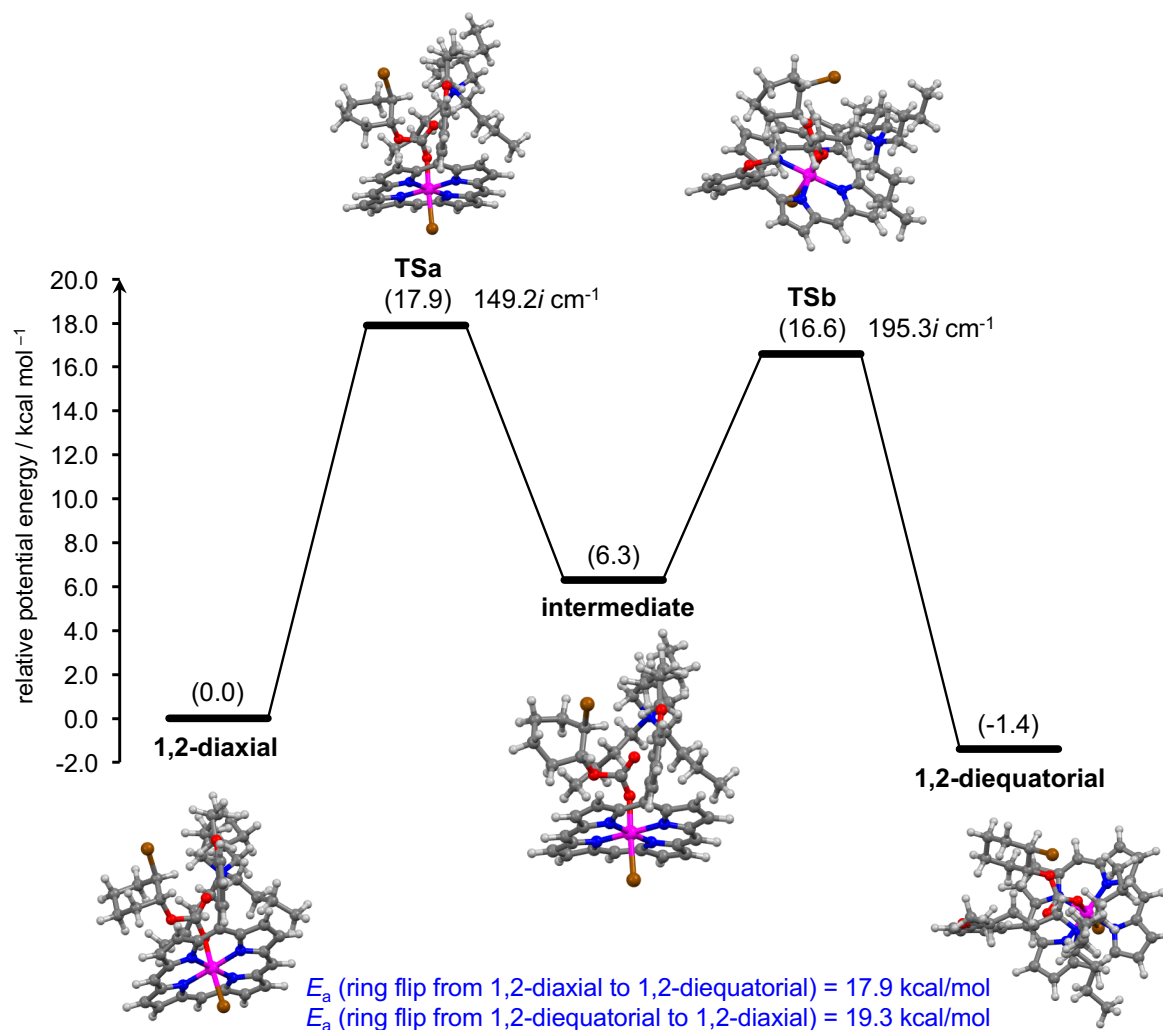

**Fig. S14.** Potential energy profile for the ring flip from 1,2-diaxial to 1,2-diequatorial conformations in intermediate **I3a** with Al<sup>III</sup> complex **2'**. Computations were performed at the  $\omega$ B97XD/6-31G\* level with the SCRF method (Et<sub>2</sub>O).

The 1,2-diaxial conformation can be converted into the 1,2-diequatorial conformation by the ring flip. We have examined the energy barrier for the ring-flip process in intermediate **I3a** with Al<sup>III</sup> complex **2'** (Fig. S14). The energy barrier for the conversion of the 1,2-diaxial conformation into the 1,2-diequatorial conformation is 17.9 kcal mol<sup>-1</sup>, and that for the backward conformational change is 19.3 kcal mol<sup>-1</sup>. These energy barriers are greater than that ( $E_a = 14.6$  kcal mol<sup>-1</sup>) for the carbonate linkage formation (**TS3b** in Fig. 3). Therefore, these results suggest that the terminal carbonate linkage is formed prior to the conformational change.

[9] Binding energies of Al<sup>III</sup> and Mg<sup>II</sup> porphyrins for axial ligands.

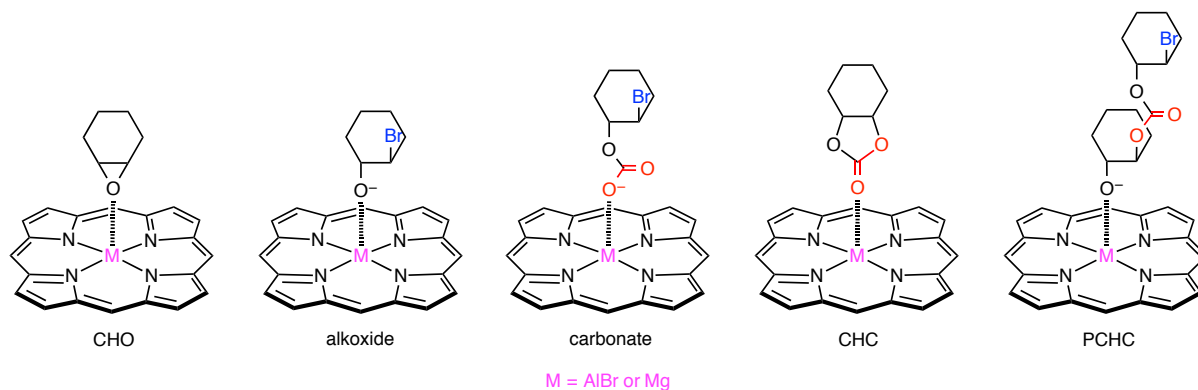

**Fig. S15** Al<sup>III</sup> and Mg<sup>II</sup> porphyrins complexed with CHO, alkoxide, carbonate, CHC, and PCHC.

**Table S1.** Binding energies of Al<sup>III</sup> and Mg<sup>II</sup> porphyrins for axial ligands.

|                                         | binding energy ( <i>BE</i> ) (kcal mol <sup>-1</sup> ) <sup>a</sup> |             |             |            |             |
|-----------------------------------------|---------------------------------------------------------------------|-------------|-------------|------------|-------------|
|                                         | CHO                                                                 | alkoxide    | carbonate   | CHC        | PCHC        |
| Al <sup>III</sup> porphyrin             | -22.3                                                               | -58.7       | -34.0       | -16.6      | -59.5       |
| Mg <sup>II</sup> porphyrin              | -20.9                                                               | -49.5       | -32.7       | -19.2      | -53.4       |
| $\Delta BE_{\text{Al-Mg}}$ <sup>b</sup> | <b>-1.4</b>                                                         | <b>-9.2</b> | <b>-1.3</b> | <b>2.6</b> | <b>-6.1</b> |

<sup>a</sup> The binding energy is defined as follows:  $BE = E_{\text{complex}} - E_{\text{porphyrin}} - E_{\text{ligand}}$ .

<sup>b</sup> A negative value of  $\Delta BE_{\text{Al-Mg}}$  means that the Al<sup>III</sup> complex is more stable than the corresponding Mg<sup>II</sup> complex.

Simple models were used to estimate the relative binding abilities of Al<sup>III</sup> and Mg<sup>II</sup> porphyrins for neutral or anionic ligands such as CHO, alkoxide, carbonate, CHC, and PCHC (Fig. S15). Calculated binding energies of Al<sup>III</sup> and Mg<sup>II</sup> porphyrins for the ligands are listed in Table S1. Al<sup>III</sup> porphyrin binds alkoxide and PCHC much more strongly than Mg<sup>II</sup> porphyrin. This is considered to result from the intrinsic nature of the metal centers such as Lewis acidity and ionic radius, and the same trend can be expected for bifunctional Al<sup>III</sup> complex **2'** and Mg<sup>II</sup> complex **3'**. This accounts partly for the energy differences between **2'** and **3'** in the potential energy profiles (Fig. 3), where Al<sup>III</sup> complex **2'** stabilizes anionic species in **TS1**, **I1**, **I2**, **TS3b**, and **I4b** more effectively than Mg<sup>II</sup> complex **3'**.



[10] Energy for the dissociation of the carbonate anion from the Al atom.

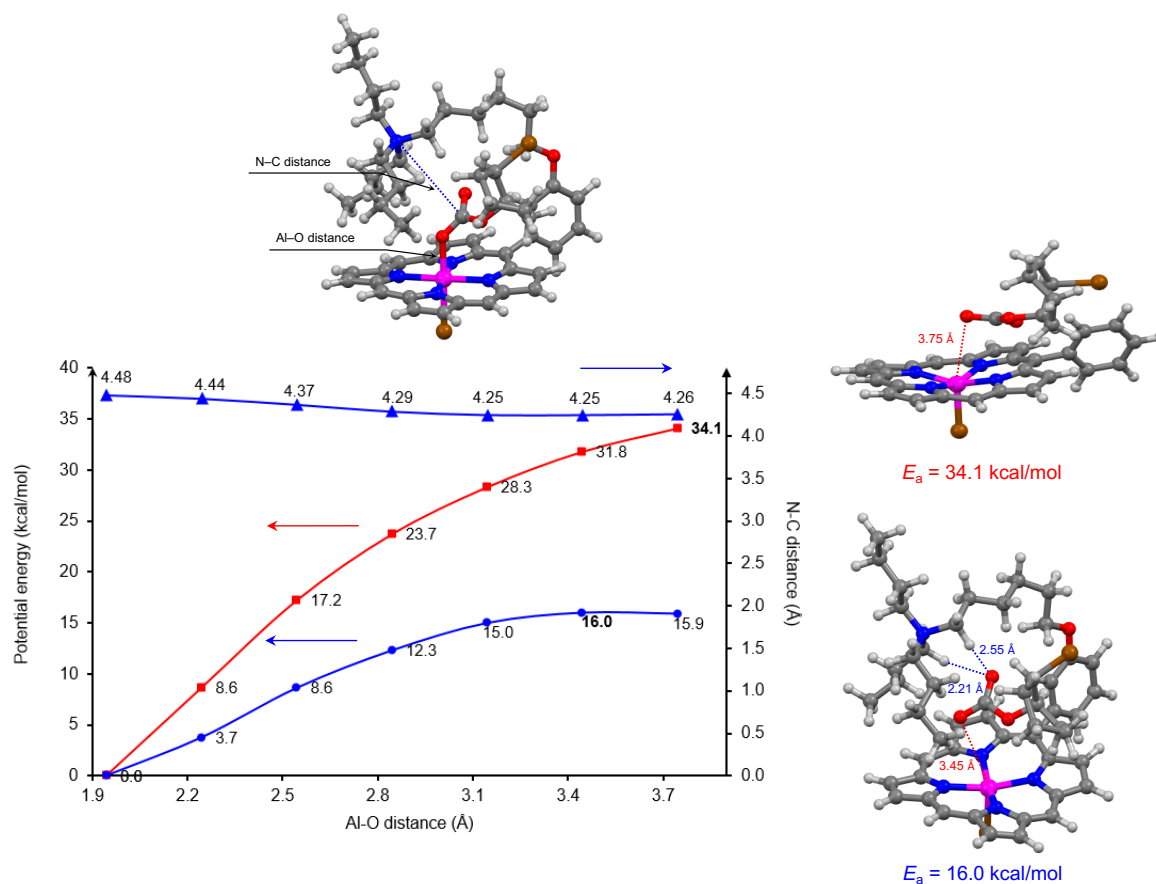

**Fig. S16** Potential energy of intermediate **I3a** with a scan of the Al–O distance. The potential energies for Al<sup>III</sup> porphyrins with and without the quaternary ammonium cation are shown by blue circle and red square, respectively, where the N–C distance in the former case is shown by blue triangle. Computations were performed at the  $\omega$ B97XD/6-31G\* level with the SCRf method (Et<sub>2</sub>O). The structures of Al<sup>III</sup> complex **2'** at the Al–O distance of 3.45 Å and Al<sup>III</sup> 5-phenylporphyrin complex at the Al–O distance of 3.75 Å are shown on the right hand.

The tethered quaternary ammonium cation may promote the dissociation of the carbonate anion from the Al atom in **I3a**, facilitating the replacement with CHO. We compared the potential energies between Al<sup>III</sup> complex **2'** and Al<sup>III</sup> 5-phenylporphyrin by scanning the Al–O bond distance. As shown in Fig. S16, **2'** has a lower energy barrier ( $E_a = 16.0 \text{ kcal mol}^{-1}$ ) than Al<sup>III</sup> 5-phenylporphyrin ( $E_a = 34.1 \text{ kcal mol}^{-1}$ ), which indicates that the carbonate anion dissociates more easily in **2'**. Fig. S16 also indicates that the N–C distance changes slightly upon the Al–O bond dissociation. Obviously, the carbonate anion is well solvated and stabilized by the tethered quaternary ammonium cation.

**[11] Cartesian coordinates.**

**R\_AI cat. 2'**

C 1.3920 1.7090 -1.3760  
C 0.3960 1.9050 -2.3980  
N 1.9600 0.4690 -1.5100  
C 1.3510 -0.1140 -2.5900  
C 0.3750 0.7760 -3.1490  
C 1.7370 2.6660 -0.4160  
H -0.1950 2.8000 -2.5220  
C 5.2940 0.7190 2.2440  
C 2.7550 2.4910 0.5260  
H -0.2390 0.5520 -4.0120  
N 3.5330 1.3690 0.6620  
C 3.0990 3.4500 1.5460  
C 4.3610 1.6060 1.7240  
C 4.1020 2.9050 2.2770  
C 5.5160 -0.5710 1.7960  
N 4.8530 -1.1700 0.7610  
C 5.3570 -2.4370 0.6720  
C 6.4650 -1.4860 2.3760  
C 6.3660 -2.6450 1.6800  
C 1.6050 -1.3890 -3.0740  
C 2.4960 -2.2970 -2.5270  
N 3.2760 -2.0660 -1.4280  
C 4.0050 -3.2070 -1.2360  
C 2.7310 -3.6230 -3.0360  
C 3.6610 -4.1910 -2.2290  
C 4.9640 -3.3930 -0.2510  
H 2.6210 4.4090 1.6820  
H 4.6180 3.3280 3.1290  
H 7.1150 -1.2520 3.2100  
H 6.9140 -3.5670 1.8200  
H 2.2440 -4.0470 -3.9050  
H 4.1000 -5.1780 -2.2940  
C -5.8230 2.1870 0.4590



C -5.7790 3.5370 -0.2780  
C -4.7100 4.5140 0.2150  
C -3.2770 4.0240 0.0690  
C 0.9570 3.9360 -0.3820  
C -0.4040 3.8990 -0.0520  
C -1.1310 5.0890 -0.0070  
C -0.5000 6.3100 -0.2670  
C 0.8490 6.3360 -0.5910  
C 1.5810 5.1530 -0.6610  
C -9.7280 -1.7010 -1.8370  
C -8.2510 -1.9680 -2.1130  
C -7.3600 -1.5260 -0.9470  
H -3.0870 -2.1420 1.7850  
C -4.9740 -2.6410 0.8030  
C -4.0820 -2.5260 2.0350  
C -3.9670 -3.8960 2.7130  
C -3.3720 -3.8020 4.1160  
H -4.9600 -4.3610 2.7720  
H -3.2650 -4.7950 4.5650  
O -2.4510 5.1640 0.2990  
H -0.8630 2.9460 0.2060  
H 2.6330 5.1690 -0.9280  
H 1.3320 7.2860 -0.8020  
H -1.0880 7.2210 -0.2200  
C -5.1300 1.0520 -0.3010  
C -5.1830 -0.2120 0.5440  
N -4.8870 -1.5020 -0.1890  
C -3.5000 -1.4130 -0.8110  
C -0.9900 -3.8470 -2.4660  
C -1.6720 -2.5240 -2.1340  
C -2.9250 -2.7410 -1.2810  
H -0.1390 -3.6960 -3.1340  
H -1.9470 -1.9980 -3.0570  
H -2.6600 -3.3650 -0.4190  
H -4.0800 1.3080 -0.4840  
H -5.6230 0.9250 -1.2730

H -6.1640 -0.3450 1.0060  
H -4.4280 -0.1170 1.3260  
C -5.8950 -1.7590 -1.2940  
H -5.3630 2.2860 1.4510  
H -6.8670 1.8970 0.6300  
H -5.6460 3.3640 -1.3550  
H -6.7490 4.0350 -0.1710  
H -4.8920 4.7590 1.2680  
H -4.7990 5.4500 -0.3490  
H -3.0930 3.6430 -0.9480  
H -3.0430 3.2200 0.7780  
H -8.0970 -3.0370 -2.3050  
H -7.5410 -0.4650 -0.7450  
H -9.9110 -0.6330 -1.6740  
H -10.3490 -2.0240 -2.6780  
H -10.0650 -2.2400 -0.9440  
H -7.9450 -1.4380 -3.0250  
H -7.6520 -2.0810 -0.0480  
H -4.7500 -3.5530 0.2460  
H -6.0190 -2.7010 1.1120  
H -4.5110 -1.8070 2.7410  
H -3.3520 -4.5560 2.0870  
H -4.0130 -3.2010 4.7700  
H -2.3850 -3.3320 4.0940  
H -2.8460 -0.9270 -0.0790  
H -3.6000 -0.7250 -1.6530  
H -1.6860 -4.5380 -2.9550  
H -0.6130 -4.3310 -1.5580  
H -0.9690 -1.8680 -1.6080  
H -3.6500 -3.3110 -1.8750  
H -5.7450 -2.7940 -1.6070  
H -5.6120 -1.1200 -2.1320  
H 1.0480 -1.7020 -3.9520  
H 5.8850 1.0620 3.0870  
H 5.4610 -4.3570 -0.2140  
Al 3.4930 -0.3090 -0.4600

Br 5.1790 0.4930 -2.0080  
C 1.2190 -0.2940 1.7230  
C 0.6900 -1.2370 0.7450  
C 0.1880 -2.6010 1.1520  
C 0.0020 -2.7160 2.6690  
C 1.1920 -2.1360 3.4370  
C 1.2970 -0.6290 3.1840  
O 2.1310 -1.0540 0.8780  
H 1.1650 0.7580 1.4690  
Br -1.9770 0.7160 1.7270  
H 0.3050 -0.8090 -0.1760  
H -0.7660 -2.7840 0.6470  
H 0.8970 -3.3510 0.7810  
H -0.1700 -3.7630 2.9430  
H -0.8950 -2.1450 2.9460  
H 1.0740 -2.3170 4.5100  
H 2.1190 -2.6330 3.1240  
H 0.4570 -0.1090 3.6600  
H 2.2240 -0.2150 3.5960

**TS1\_AI cat. 2'**

C 1.5700 1.6770 -1.2600  
C 0.5200 1.9560 -2.2120  
N 1.9700 0.3760 -1.3880  
C 1.2140 -0.1700 -2.3860  
C 0.2960 0.8090 -2.9010  
C 2.1020 2.6090 -0.3570  
H 0.0340 2.9120 -2.3410  
C 5.5570 0.2990 2.1430  
C 3.1400 2.3320 0.5410  
H -0.4100 0.6340 -3.7030  
N 3.7760 1.1290 0.6730  
C 3.6580 3.2660 1.5160  
C 4.6860 1.2770 1.6780  
C 4.6200 2.6120 2.2130  
C 5.6560 -1.0010 1.6690

N 4.8890 -1.5380 0.6790  
C 5.3120 -2.8230 0.5170  
C 6.5960 -1.9820 2.1570  
C 6.3850 -3.1120 1.4390  
C 1.3030 -1.4760 -2.8570  
C 2.1820 -2.4500 -2.4070  
N 3.0850 -2.2880 -1.3970  
C 3.7620 -3.4670 -1.2920  
C 2.2870 -3.7800 -2.9570  
C 3.2640 -4.4130 -2.2620  
C 4.7930 -3.7270 -0.4000  
H 3.3180 4.2830 1.6460  
H 5.2340 2.9850 3.0220  
H 7.3210 -1.8060 2.9420  
H 6.8960 -4.0630 1.5120  
H 1.6950 -4.1590 -3.7800  
H 3.6390 -5.4200 -2.3900  
C -4.9740 2.5390 0.4370  
C -4.9670 3.8330 -0.3830  
C -4.0610 4.9200 0.2030  
C -2.6120 4.4510 0.2660  
C 1.4960 3.9720 -0.3290  
C 0.1500 4.1100 0.0290  
C -0.4460 5.3720 0.0230  
C 0.3140 6.5040 -0.2870  
C 1.6520 6.3620 -0.6210  
C 2.2460 5.1010 -0.6600  
C -10.1430 -1.1250 -1.7250  
C -8.6690 -1.2720 -2.0950  
C -7.7600 -1.2440 -0.8610  
H -3.4710 -2.1570 1.7190  
C -5.4540 -2.3450 0.8150  
C -4.5140 -2.3140 2.0160  
C -4.6450 -3.6300 2.7910  
C -3.9100 -3.5980 4.1290  
H -5.7080 -3.8420 2.9660

H -4.0150 -4.5530 4.6520  
O -1.7610 5.5870 0.2950  
H -0.4050 3.2190 0.3080  
H 3.2860 4.9880 -0.9500  
H 2.2360 7.2410 -0.8760  
H -0.1680 7.4760 -0.2770  
C -5.3730 1.3160 -0.3920  
C -5.3680 0.0860 0.5050  
N -5.2590 -1.2480 -0.2060  
C -3.8850 -1.3370 -0.8640  
C -1.4390 -3.9960 -2.2130  
C -2.0920 -2.6310 -2.0220  
C -3.3990 -2.7320 -1.2260  
H -0.5030 -3.9040 -2.7690  
H -2.2930 -2.1680 -2.9960  
H -3.2160 -3.3230 -0.3210  
H -4.6400 1.2130 -1.1990  
H -6.3540 1.4630 -0.8590  
H -6.2700 0.0460 1.1200  
H -4.5060 0.1290 1.1720  
C -6.3060 -1.3820 -1.2920  
H -3.9720 2.3380 0.8300  
H -5.6350 2.6480 1.3060  
H -4.6160 3.6120 -1.4010  
H -5.9890 4.2150 -0.4870  
H -4.4070 5.2240 1.1990  
H -4.1020 5.8080 -0.4380  
H -2.3800 3.8480 -0.6250  
H -2.4220 3.8220 1.1440  
H -8.5160 -2.2140 -2.6370  
H -7.9200 -0.3010 -0.3270  
H -10.3260 -0.1730 -1.2140  
H -10.7740 -1.1530 -2.6180  
H -10.4650 -1.9320 -1.0590  
H -8.3780 -0.4650 -2.7790  
H -8.0550 -2.0550 -0.1880

H -5.3730 -3.2900 0.2760  
H -6.4830 -2.2550 1.1680  
H -4.7750 -1.4820 2.6770  
H -4.2610 -4.4520 2.1740  
H -4.3100 -2.8110 4.7780  
H -2.8430 -3.4050 3.9890  
H -3.1760 -0.8460 -0.1920  
H -3.9450 -0.7280 -1.7680  
H -2.0980 -4.6790 -2.7610  
H -1.2030 -4.4540 -1.2460  
H -1.3910 -1.9630 -1.5060  
H -4.1380 -3.2810 -1.8230  
H -6.1410 -2.3570 -1.7580  
H -6.0690 -0.6170 -2.0340  
H 0.6350 -1.7490 -3.6690  
H 6.2320 0.5850 2.9440  
H 5.2380 -4.7170 -0.4280  
Al 3.4050 -0.5920 -0.3280  
Br 5.1040 0.1160 -2.0610  
C 1.2520 -0.3630 1.6030  
C 0.0350 -0.8680 0.8780  
C -0.4660 -2.2280 1.2500  
C -0.4930 -2.4570 2.7620  
C 0.8400 -2.0770 3.4140  
C 1.2070 -0.6240 3.1070  
O 2.1940 -1.1550 0.9660  
H 1.3790 0.7110 1.4220  
Br -1.7470 0.6410 1.5160  
H -0.0200 -0.5830 -0.1670  
H -1.4400 -2.4180 0.7910  
H 0.2450 -2.9200 0.7750  
H -0.7370 -3.5060 2.9630  
H -1.2960 -1.8410 3.1890  
H 0.7800 -2.2340 4.4970  
H 1.6330 -2.7310 3.0330  
H 0.4760 0.0550 3.5650

H 2.1940 -0.3780 3.5140

**I1\_AI cat. 2'**

C 1.5800 1.6820 -1.2580

C 0.5270 1.9720 -2.2050

N 1.9640 0.3770 -1.3860

C 1.1970 -0.1640 -2.3770

C 0.2880 0.8250 -2.8910

C 2.1300 2.6100 -0.3610

H 0.0530 2.9330 -2.3360

C 5.5530 0.2600 2.1450

C 3.1670 2.3220 0.5360

H -0.4240 0.6560 -3.6900

N 3.7820 1.1110 0.6750

C 3.7060 3.2560 1.5000

C 4.6980 1.2500 1.6760

C 4.6590 2.5910 2.1990

C 5.6300 -1.0440 1.6780

N 4.8530 -1.5750 0.6930

C 5.2630 -2.8630 0.5290

C 6.5620 -2.0350 2.1650

C 6.3360 -3.1640 1.4490

C 1.2720 -1.4710 -2.8470

C 2.1410 -2.4540 -2.3980

N 3.0440 -2.3040 -1.3880

C 3.7090 -3.4890 -1.2830

C 2.2330 -3.7850 -2.9510

C 3.2040 -4.4280 -2.2570

C 4.7360 -3.7610 -0.3890

H 3.3870 4.2810 1.6230

H 5.2840 2.9600 3.0010

H 7.2920 -1.8660 2.9460

H 6.8380 -4.1200 1.5210

H 1.6400 -4.1550 -3.7770

H 3.5690 -5.4390 -2.3870

C -4.8640 2.5500 0.4720

C -4.9030 3.8600 -0.3180  
C -4.0000 4.9510 0.2660  
C -2.5480 4.4900 0.3090  
C 1.5420 3.9800 -0.3340  
C 0.2010 4.1330 0.0360  
C -0.3850 5.3990 0.0310  
C 0.3810 6.5230 -0.2900  
C 1.7150 6.3670 -0.6360  
C 2.2980 5.1010 -0.6760  
C -10.1540 -0.9770 -1.6860  
C -8.6860 -1.1510 -2.0670  
C -7.7690 -1.1510 -0.8380  
H -3.4910 -2.1940 1.7130  
C -5.4750 -2.3260 0.8050  
C -4.5370 -2.3300 2.0070  
C -4.6960 -3.6540 2.7630  
C -3.9650 -3.6570 4.1030  
H -5.7630 -3.8470 2.9320  
H -4.0930 -4.6170 4.6120  
O -1.6970 5.6240 0.3140  
H -0.3570 3.2460 0.3190  
H 3.3340 4.9790 -0.9750  
H 2.3040 7.2410 -0.8990  
H -0.0920 7.5000 -0.2800  
C -5.3420 1.3510 -0.3500  
C -5.3400 0.1070 0.5310  
N -5.2630 -1.2160 -0.2010  
C -3.8960 -1.3200 -0.8690  
C -1.5000 -3.9900 -2.2820  
C -2.1340 -2.6200 -2.0660  
C -3.4380 -2.7160 -1.2640  
H -0.5680 -3.9010 -2.8440  
H -2.3350 -2.1390 -3.0310  
H -3.2600 -3.3300 -0.3740  
H -4.6540 1.2370 -1.1940  
H -6.3380 1.5350 -0.7680



H -6. 2330 0. 0740 1. 1600  
H -4. 4700 0. 1260 1. 1880  
C -6. 3210 -1. 3140 -1. 2810  
H -3. 8360 2. 3280 0. 7810  
H -5. 4530 2. 6490 1. 3930  
H -4. 5770 3. 6650 -1. 3500  
H -5. 9340 4. 2240 -0. 3830  
H -4. 3370 5. 2450 1. 2670  
H -4. 0540 5. 8420 -0. 3680  
H -2. 3290 3. 8770 -0. 5790  
H -2. 3450 3. 8720 1. 1930  
H -8. 5550 -2. 0910 -2. 6170  
H -7. 9070 -0. 2090 -0. 2950  
H -10. 3150 -0. 0250 -1. 1680  
H -10. 7920 -0. 9890 -2. 5740  
H -10. 4870 -1. 7820 -1. 0210  
H -8. 3840 -0. 3450 -2. 7470  
H -8. 0760 -1. 9620 -0. 1710  
H -5. 4070 -3. 2640 0. 2500  
H -6. 5020 -2. 2260 1. 1570  
H -4. 7830 -1. 5020 2. 6800  
H -4. 3270 -4. 4740 2. 1340  
H -4. 3500 -2. 8720 4. 7620  
H -2. 8930 -3. 4860 3. 9680  
H -3. 1740 -0. 8610 -0. 1910  
H -3. 9460 -0. 6890 -1. 7580  
H -2. 1730 -4. 6580 -2. 8330  
H -1. 2610 -4. 4630 -1. 3230  
H -1. 4200 -1. 9720 -1. 5430  
H -4. 1910 -3. 2370 -1. 8680  
H -6. 1790 -2. 2860 -1. 7590  
H -6. 0720 -0. 5460 -2. 0160  
H 0. 6000 -1. 7380 -3. 6580  
H 6. 2360 0. 5400 2. 9420  
H 5. 1710 -4. 7560 -0. 4190  
Al 3. 3620 -0. 6180 -0. 2970

Br 5.0920 0.0650 -2.0430  
C 1.1880 -0.3600 1.5710  
C -0.1470 -0.7290 0.8950  
C -0.5740 -2.1520 1.2130  
C -0.5930 -2.4380 2.7150  
C 0.7460 -2.0830 3.3700  
C 1.1330 -0.6310 3.0810  
O 2.1490 -1.1450 0.9710  
H 1.3530 0.7170 1.4200  
Br -1.5810 0.5700 1.4720  
H -0.0900 -0.5390 -0.1750  
H -1.5430 -2.3820 0.7570  
H 0.1700 -2.7900 0.7210  
H -0.8310 -3.4960 2.8790  
H -1.3950 -1.8490 3.1800  
H 0.6890 -2.2570 4.4510  
H 1.5280 -2.7390 2.9730  
H 0.4160 0.0520 3.5550  
H 2.1240 -0.4090 3.4920

**I2\_Al cat. 2'**

C 1.3360 2.0010 -1.2070  
C 0.2460 2.2890 -2.1130  
N 1.7570 0.7140 -1.3970  
C 0.9740 0.1830 -2.3790  
C 0.0150 1.1570 -2.8250  
C 1.8680 2.9050 -0.2750  
H -0.2580 3.2400 -2.1990  
C 5.3630 0.5320 2.1060  
C 2.9100 2.6020 0.6110  
H -0.7170 0.9940 -3.6060  
N 3.5730 1.4100 0.6780  
C 3.3890 3.4840 1.6530  
C 4.4580 1.5110 1.7090  
C 4.3480 2.8050 2.3300  
C 5.5460 -0.7040 1.5050

N 4.8170 -1.1880 0.4600  
C 5.3630 -2.3910 0.1320  
C 6.5790 -1.6450 1.8670  
C 6.4730 -2.6880 1.0080  
C 1.0970 -1.0930 -2.9200  
C 2.0670 -2.0290 -2.5970  
N 3.0160 -1.8770 -1.6310  
C 3.8180 -2.9780 -1.6990  
C 2.2630 -3.2810 -3.2910  
C 3.3530 -3.8660 -2.7380  
C 4.9150 -3.2250 -0.8840  
H 3.0260 4.4840 1.8390  
H 4.9360 3.1380 3.1760  
H 7.2950 -1.5010 2.6670  
H 7.0770 -3.5840 0.9560  
H 1.6510 -3.6370 -4.1100  
H 3.8180 -4.8080 -2.9980  
C -5.0460 2.4620 0.3980  
C -5.1350 3.7780 -0.3780  
C -4.3470 4.9180 0.2750  
C -2.8740 4.5460 0.3960  
C 1.2330 4.2500 -0.1750  
C -0.1170 4.3330 0.1840  
C -0.7570 5.5720 0.2210  
C -0.0320 6.7400 -0.0300  
C 1.3140 6.6540 -0.3540  
C 1.9490 5.4160 -0.4470  
C -10.1070 -1.2940 -1.9050  
C -8.6200 -1.3850 -2.2370  
C -7.7460 -1.3660 -0.9770  
H -3.5200 -2.1780 1.7220  
C -5.4660 -2.4220 0.7590  
C -4.5650 -2.3670 1.9880  
C -4.6710 -3.6880 2.7570  
C -3.9370 -3.6430 4.0950  
H -5.7290 -3.9230 2.9290

H -4.0260 -4.6000 4.6180  
O -2.0860 5.7230 0.4730  
H -0.6390 3.4130 0.4230  
H 2.9930 5.3490 -0.7350  
H 1.8720 7.5620 -0.5620  
H -0.5440 7.6960 0.0150  
C -5.4410 1.2440 -0.4390  
C -5.4140 0.0090 0.4520  
N -5.2630 -1.3200 -0.2580  
C -3.8710 -1.3810 -0.8790  
C -1.3200 -3.9780 -2.1540  
C -2.0100 -2.6290 -1.9790  
C -3.3460 -2.7630 -1.2370  
H -0.3560 -3.8560 -2.6550  
H -2.1820 -2.1610 -2.9560  
H -3.1850 -3.3600 -0.3320  
H -4.7210 1.1560 -1.2600  
H -6.4310 1.3820 -0.8890  
H -6.3220 -0.0530 1.0560  
H -4.5640 0.0700 1.1340  
C -6.2790 -1.4720 -1.3710  
H -4.0150 2.2910 0.7300  
H -5.6610 2.5220 1.3050  
H -4.7390 3.6240 -1.3920  
H -6.1860 4.0670 -0.4960  
H -4.7620 5.1690 1.2580  
H -4.4230 5.8150 -0.3490  
H -2.5730 3.9690 -0.4910  
H -2.6840 3.9190 1.2760  
H -8.4230 -2.3050 -2.8010  
H -7.9380 -0.4370 -0.4290  
H -10.3340 -0.3670 -1.3680  
H -10.7120 -1.3120 -2.8170  
H -10.4230 -2.1340 -1.2750  
H -8.3360 -0.5490 -2.8890  
H -8.0440 -2.1960 -0.3300

H -5.3450 -3.3650 0.2220  
H -6.5080 -2.3570 1.0760  
H -4.8720 -1.5470 2.6440  
H -4.2670 -4.4990 2.1380  
H -4.3500 -2.8640 4.7440  
H -2.8730 -3.4330 3.9530  
H -3.1910 -0.8830 -0.1840  
H -3.9150 -0.7630 -1.7780  
H -1.9340 -4.6660 -2.7450  
H -1.1240 -4.4420 -1.1820  
H -1.3440 -1.9550 -1.4290  
H -4.0520 -3.3170 -1.8660  
H -6.0820 -2.4420 -1.8340  
H -6.0370 -0.7010 -2.1050  
H 0.4010 -1.3580 -3.7120  
H 6.0160 0.7780 2.9380  
H 5.4560 -4.1520 -1.0450  
Al 3.2380 -0.2700 -0.4140  
Br 4.8840 0.6630 -2.1450  
C 1.1120 -0.1980 1.4900  
C -0.2460 -0.6260 0.9040  
C -0.6160 -2.0450 1.2920  
C -0.5410 -2.2850 2.8000  
C 0.8170 -1.8660 3.3760  
C 1.1570 -0.4220 3.0060  
O 2.0710 -0.9530 0.8380  
H 1.2200 0.8800 1.3100  
Br -1.6870 0.6490 1.5160  
H -0.2480 -0.4670 -0.1730  
H -1.6010 -2.3180 0.9000  
H 0.1140 -2.6760 0.7740  
H -0.7330 -3.3450 3.0070  
H -1.3390 -1.7120 3.2930  
H 0.8120 -1.9920 4.4650  
H 1.6010 -2.5200 2.9820  
H 0.4560 0.2650 3.4980

H 2.1660 -0.1650 3.3460  
C 2.4340 -4.2340 0.9740  
O 1.6250 -4.4160 0.1540  
O 3.2280 -4.1060 1.8150

**TS2\_AI cat. 2'**

C 1.5070 1.8560 -1.3050  
C 0.4610 2.1790 -2.2440  
N 1.8280 0.5290 -1.4110  
C 1.0180 0.0110 -2.3830  
C 0.1530 1.0330 -2.9020  
C 2.0900 2.7700 -0.4180  
H 0.0290 3.1600 -2.3800  
C 5.6300 0.3810 1.8740  
C 3.1440 2.4560 0.4500  
H -0.5790 0.8840 -3.6850  
N 3.7540 1.2380 0.5460  
C 3.7340 3.3740 1.3970  
C 4.7300 1.3660 1.4920  
C 4.7230 2.6990 2.0330  
C 5.6860 -0.9120 1.3790  
N 4.8230 -1.4430 0.4650  
C 5.2360 -2.7260 0.2480  
C 6.6700 -1.8930 1.7610  
C 6.3920 -3.0180 1.0570  
C 1.0090 -1.3100 -2.8140  
C 1.8680 -2.3110 -2.3860  
N 2.8510 -2.1600 -1.4520  
C 3.5120 -3.3540 -1.3950  
C 1.8880 -3.6530 -2.9160  
C 2.9090 -4.2990 -2.3020  
C 4.6250 -3.6250 -0.6150  
H 3.4280 4.3990 1.5470  
H 5.3950 3.0570 2.8020  
H 7.4630 -1.7230 2.4770  
H 6.9090 -3.9690 1.0720

H 1.2170 -4.0280 -3.6780  
H 3.2480 -5.3160 -2.4460  
C -4.8960 2.4790 0.8510  
C -4.9620 3.8310 0.1260  
C -4.0280 4.9040 0.6930  
C -2.5670 4.4890 0.5650  
C 1.4890 4.1330 -0.3300  
C 0.1610 4.2380 0.0970  
C -0.4530 5.4850 0.1930  
C 0.2730 6.6420 -0.1030  
C 1.5930 6.5340 -0.5180  
C 2.2050 5.2870 -0.6450  
C -10.3310 -0.5010 -1.2020  
C -8.9070 -0.6570 -1.7300  
C -7.9080 -0.9420 -0.6040  
H -3.5710 -2.8780 1.2590  
C -5.6230 -2.4350 0.7130  
C -4.5420 -2.7370 1.7410  
C -4.9100 -4.0140 2.5050  
C -3.8500 -4.4010 3.5330  
H -5.8760 -3.8740 3.0040  
H -4.1430 -5.3070 4.0710  
O -1.7540 5.6530 0.5560  
H -0.3670 3.3260 0.3460  
H 3.2310 5.2070 -0.9910  
H 2.1500 7.4340 -0.7600  
H -0.2150 7.6080 -0.0170  
C -5.2900 1.3280 -0.0800  
C -5.2930 0.0080 0.6780  
N -5.3810 -1.2410 -0.1840  
C -4.0760 -1.3770 -0.9530  
C -2.0670 -3.9220 -3.0420  
C -2.4580 -2.6070 -2.3750  
C -3.7940 -2.7120 -1.6260  
H -1.1220 -3.8140 -3.5810  
H -2.5250 -1.8140 -3.1290

H -3.7240 -3.5200 -0.8900  
H -4.5590 1.3020 -0.8960  
H -6.2710 1.5300 -0.5240  
H -6.1240 -0.0320 1.3860  
H -4.3640 -0.0840 1.2430  
C -6.5140 -1.1420 -1.1840  
H -3.8810 2.2830 1.2140  
H -5.5410 2.4960 1.7380  
H -4.7020 3.6830 -0.9310  
H -5.9950 4.1980 0.1360  
H -4.2700 5.1240 1.7390  
H -4.1660 5.8310 0.1270  
H -2.4160 3.9350 -0.3740  
H -2.2620 3.8290 1.3880  
H -8.8720 -1.4700 -2.4660  
H -7.9250 -0.1050 0.1030  
H -10.3920 0.3130 -0.4710  
H -11.0280 -0.2760 -2.0150  
H -10.6720 -1.4190 -0.7110  
H -8.6060 0.2560 -2.2570  
H -8.2350 -1.8340 -0.0590  
H -5.7710 -3.2890 0.0490  
H -6.5690 -2.2450 1.2240  
H -4.4320 -1.9120 2.4520  
H -5.0420 -4.8360 1.7900  
H -3.7040 -3.6040 4.2700  
H -2.8860 -4.5940 3.0500  
H -3.2770 -1.1290 -0.2560  
H -4.0890 -0.5880 -1.7070  
H -2.8290 -4.2450 -3.7590  
H -1.9380 -4.7170 -2.2990  
H -1.6670 -2.3020 -1.6770  
H -4.5830 -2.9840 -2.3360  
H -6.4820 -2.0600 -1.7740  
H -6.2580 -0.3150 -1.8500  
H 0.2900 -1.5700 -3.5860



H 6.3690 0.6550 2.6210  
H 5.0540 -4.6190 -0.6850  
Al 3.2910 -0.4760 -0.4200  
Br 4.8930 0.2050 -2.2650  
C 1.0530 -0.1830 1.4260  
C -0.1950 -0.7250 0.7050  
C -0.7910 -1.9540 1.3610  
C -1.1280 -1.7200 2.8330  
C 0.1210 -1.2760 3.5990  
C 0.8100 -0.0720 2.9420  
O 2.1340 -0.9880 1.0440  
H 1.2240 0.8380 1.0760  
Br -1.5670 0.7450 0.6220  
H 0.0280 -0.8930 -0.3440  
H -1.6580 -2.3070 0.7930  
H -0.0210 -2.7300 1.2770  
H -1.5370 -2.6350 3.2730  
H -1.9080 -0.9500 2.9060  
H -0.1430 -1.0180 4.6310  
H 0.8100 -2.1230 3.6690  
H 0.1710 0.8080 3.0900  
H 1.7680 0.1360 3.4260  
C 2.6960 -2.4840 2.1810  
O 2.2430 -3.4260 1.6190  
O 3.2860 -1.9690 3.0710

**I3a\_Al cat. 2' (1,2-diaxial conformation)**

C 2.0360 0.9840 -2.4170  
C 1.6690 0.9570 -3.8120  
N 2.3650 -0.2710 -1.9990  
C 2.2220 -1.0920 -3.0780  
C 1.8250 -0.3250 -4.2310  
C 2.1040 2.1440 -1.6400  
H 1.3680 1.8200 -4.3890  
C 3.9120 0.8110 2.6410  
C 2.6850 2.1910 -0.3690

H 1.6650 -0.7330 -5.2210  
N 3.0680 1.1020 0.3620  
C 2.9760 3.3990 0.3610  
C 3.5750 1.5810 1.5340  
C 3.5710 3.0190 1.5210  
C 3.7480 -0.5620 2.7460  
N 3.3050 -1.3830 1.7480  
C 3.2990 -2.6480 2.2600  
C 4.0130 -1.3330 3.9360  
C 3.7250 -2.6250 3.6370  
C 2.3110 -2.4790 -3.0460  
C 2.4420 -3.2500 -1.9000  
N 2.6140 -2.7620 -0.6360  
C 2.6860 -3.8440 0.1920  
C 2.3770 -4.6900 -1.8660  
C 2.5110 -5.0570 -0.5660  
C 2.9710 -3.7960 1.5510  
H 2.7700 4.4010 0.0120  
H 3.9390 3.6470 2.3220  
H 4.3760 -0.9210 4.8690  
H 3.8010 -3.4970 4.2740  
H 2.2480 -5.3220 -2.7360  
H 2.5200 -6.0550 -0.1450  
C -4.4090 1.2010 -0.4410  
C -5.0030 2.1100 -1.5160  
C -4.2570 3.4460 -1.6470  
C -2.7580 3.2310 -1.7840  
C 1.3820 3.3560 -2.1300  
C -0.0110 3.3050 -2.0060  
C -0.7920 4.4010 -2.3690  
C -0.1750 5.5490 -2.8790  
C 1.2060 5.5860 -3.0130  
C 1.9970 4.4950 -2.6410  
C -8.1710 -4.7680 0.1490  
C -6.9240 -4.4320 -0.6670  
C -6.0060 -3.4470 0.0650

H -1.0410 -2.0320 0.6850  
C -2.9200 -3.1140 0.7870  
C -1.7300 -2.4250 1.4360  
C -0.9420 -3.3840 2.3360  
C 0.0130 -2.6050 3.2400  
H -1.6270 -3.9860 2.9470  
H 0.6690 -3.2770 3.8010  
O -2.1460 4.4250 -2.2530  
H -0.4490 2.4000 -1.5990  
H 3.0770 4.5330 -2.7450  
H 1.6760 6.4780 -3.4150  
H -0.7910 6.3970 -3.1620  
C -5.1680 -0.1110 -0.2240  
C -4.3400 -1.1050 0.6040  
N -3.7260 -2.2530 -0.1720  
C -2.8380 -1.6890 -1.2680  
C -0.7770 -3.0040 -4.2400  
C -1.3260 -2.0060 -3.2250  
C -2.0910 -2.7160 -2.1040  
H -0.1750 -2.4990 -5.0010  
H -1.9920 -1.2980 -3.7360  
H -1.3750 -3.2770 -1.4930  
H -5.4670 -0.5410 -1.1860  
H -6.1050 0.0850 0.3080  
H -4.9180 -1.5590 1.4090  
H -3.5030 -0.5800 1.0630  
C -4.8010 -3.1170 -0.8070  
H -3.3700 0.9710 -0.7040  
H -4.3630 1.7450 0.5100  
H -4.9710 1.5850 -2.4820  
H -6.0610 2.3060 -1.3020  
H -4.4460 4.0730 -0.7670  
H -4.6260 3.9890 -2.5240  
H -2.5460 2.4130 -2.4890  
H -2.3300 2.9580 -0.8130  
H -6.3690 -5.3520 -0.8890

H -6.5750 -2.5400 0.2950  
H -8.7530 -3.8650 0.3650  
H -8.8160 -5.4630 -0.3960  
H -7.9030 -5.2330 1.1040  
H -7.2200 -4.0020 -1.6320  
H -5.6960 -3.8910 1.0180  
H -2.5920 -3.9850 0.2160  
H -3.6220 -3.4610 1.5480  
H -2.0670 -1.5830 2.0480  
H -0.3730 -4.0810 1.7080  
H -0.5470 -2.0000 3.9630  
H 0.6410 -1.9330 2.6470  
H -2.1350 -0.9920 -0.8040  
H -3.5000 -1.1080 -1.9140  
H -1.5920 -3.5320 -4.7490  
H -0.1430 -3.7500 -3.7490  
H -0.5140 -1.4150 -2.7890  
H -2.7840 -3.4390 -2.5500  
H -4.3060 -4.0370 -1.1190  
H -5.1280 -2.6010 -1.7120  
H 2.1890 -3.0040 -3.9870  
H 4.2840 1.3350 3.5160  
H 3.0110 -4.7400 2.0860  
C 0.1570 0.2040 0.4620  
O -0.7680 0.5470 -0.2840  
O 0.9470 -0.7760 0.2910  
Al 2.8550 -0.8330 -0.1310  
Br 5.2720 -0.9570 -0.7620  
C -0.3330 2.0890 1.8550  
C -1.7990 1.7650 2.1700  
C -1.9800 1.0640 3.5080  
C -1.2830 1.7890 4.6610  
C 0.1940 2.0290 4.3350  
C 0.3530 2.7950 3.0190  
O 0.3710 0.8620 1.6400  
H -0.2740 2.6920 0.9430

Br -2.8260 3.4530 2.1080  
H -2.2160 1.1900 1.3470  
H -3.0450 0.9130 3.7110  
H -1.5230 0.0720 3.3920  
H -1.3850 1.1990 5.5780  
H -1.7840 2.7500 4.8400  
H 0.6740 2.5880 5.1460  
H 0.7150 1.0670 4.2560  
H -0.0900 3.7930 3.1120  
H 1.4070 2.9260 2.7690

**TS3a\_Al cat. 2' (1,2-diaxial conformation)**

C 1.8650 0.9990 -2.3620  
C 1.3750 0.9590 -3.7240  
N 2.2380 -0.2450 -1.9660  
C 2.0090 -1.0790 -3.0280  
C 1.5020 -0.3270 -4.1420  
C 1.9820 2.1720 -1.6060  
H 1.0220 1.8160 -4.2760  
C 4.2340 0.9020 2.4810  
C 2.6770 2.2370 -0.3970  
H 1.2620 -0.7380 -5.1120  
N 3.2050 1.1670 0.2730  
C 2.9280 3.4510 0.3490  
C 3.7570 1.6600 1.4180  
C 3.6260 3.0930 1.4570  
C 4.1400 -0.4750 2.5960  
N 3.6180 -1.3110 1.6500  
C 3.6960 -2.5760 2.1650  
C 4.5430 -1.2350 3.7550  
C 4.2580 -2.5300 3.4930  
C 2.1070 -2.4630 -2.9950  
C 2.3700 -3.2240 -1.8670  
N 2.6900 -2.7230 -0.6370  
C 2.8760 -3.7960 0.1830  
C 2.3310 -4.6630 -1.8170

C 2. 6310 -5. 0180 -0. 5390  
C 3. 3220 -3. 7340 1. 4990  
H 2. 6060 4. 4350 0. 0480  
H 3. 9960 3. 7240 2. 2470  
H 4. 9860 -0. 8080 4. 6480  
H 4. 4200 -3. 3970 4. 1190  
H 2. 1070 -5. 3050 -2. 6580  
H 2. 7060 -6. 0070 -0. 1100  
C -4. 4010 1. 1200 -0. 2200  
C -5. 1080 1. 9890 -1. 2650  
C -4. 4130 3. 3390 -1. 5080  
C -2. 9260 3. 1510 -1. 7280  
C 1. 2150 3. 3710 -2. 0600  
C -0. 1760 3. 2840 -1. 9540  
C -0. 9840 4. 3600 -2. 3130  
C -0. 3930 5. 5290 -2. 7970  
C 0. 9920 5. 6060 -2. 9090  
C 1. 8070 4. 5330 -2. 5430  
C -8. 4370 -4. 4770 0. 2740  
C -7. 1670 -4. 2420 -0. 5450  
C -6. 1510 -3. 3660 0. 2050  
H -1. 2210 -2. 1550 0. 9550  
C -3. 0210 -3. 3610 0. 8260  
C -1. 8350 -2. 7940 1. 5870  
C -0. 9490 -3. 9030 2. 1540  
C 0. 1660 -3. 3120 3. 0200  
H -1. 5460 -4. 6090 2. 7420  
H 0. 8400 -4. 0920 3. 3850  
O -2. 3440 4. 3440 -2. 2260  
H -0. 5950 2. 3590 -1. 5700  
H 2. 8850 4. 6040 -2. 6390  
H 1. 4420 6. 5180 -3. 2930  
H -1. 0290 6. 3620 -3. 0790  
C -5. 1420 -0. 1770 0. 1040  
C -4. 2700 -1. 2200 0. 8240  
N -3. 7860 -2. 3670 -0. 0400

C -2. 8910 -1. 8000 -1. 1280  
C -1. 0240 -3. 1130 -4. 2420  
C -1. 5410 -2. 1150 -3. 2130  
C -2. 2310 -2. 8210 -2. 0430  
H -0. 4680 -2. 6050 -5. 0380  
H -2. 2440 -1. 4210 -3. 6950  
H -1. 4860 -3. 4060 -1. 4960  
H -5. 5770 -0. 5960 -0. 8130  
H -6. 0040 0. 0430 0. 7490  
H -4. 7870 -1. 6800 1. 6700  
H -3. 3620 -0. 7440 1. 2120  
C -4. 9390 -3. 1130 -0. 6800  
H -3. 3990 0. 8700 -0. 5880  
H -4. 2510 1. 7050 0. 6970  
H -5. 1510 1. 4290 -2. 2110  
H -6. 1430 2. 1690 -0. 9590  
H -4. 5550 3. 9980 -0. 6430  
H -4. 8560 3. 8310 -2. 3800  
H -2. 7330 2. 3250 -2. 4310  
H -2. 4520 2. 9130 -0. 7710  
H -6. 6990 -5. 2030 -0. 7940  
H -6. 6290 -2. 4240 0. 4870  
H -8. 9370 -3. 5320 0. 5010  
H -9. 1380 -5. 1100 -0. 2780  
H -8. 2030 -4. 9730 1. 2240  
H -7. 4260 -3. 7570 -1. 4920  
H -5. 8660 -3. 8700 1. 1350  
H -2. 6920 -4. 1510 0. 1450  
H -3. 7520 -3. 7930 1. 5090  
H -2. 1920 -2. 1680 2. 4160  
H -0. 5040 -4. 4710 1. 3250  
H -0. 2530 -2. 7970 3. 8920  
H 0. 7610 -2. 5940 2. 4480  
H -2. 1390 -1. 1800 -0. 6380  
H -3. 5370 -1. 1420 -1. 7220  
H -1. 8490 -3. 6650 -4. 7020

H -0.3460 -3.8380 -3.7720  
H -0.7130 -1.5060 -2.8270  
H -2.9730 -3.5230 -2.4490  
H -4.5330 -4.0600 -1.0320  
H -5.2350 -2.5410 -1.5620  
H 1.8970 -2.9980 -3.9140  
H 4.6490 1.4450 3.3240  
H 3.4420 -4.6690 2.0330  
C 0.3010 0.0910 0.9030  
O -0.9420 0.1180 0.7420  
O 1.0980 -0.7830 0.4740  
Al 2.9830 -0.7800 -0.1820  
Br 5.2890 -0.8940 -1.0890  
C -1.5410 1.7830 1.7310  
C -0.0690 2.2090 1.8510  
H -2.0360 1.7910 0.7830  
H 0.1600 2.9400 1.0710  
C 0.2980 2.7390 3.2350  
H -0.1400 3.7390 3.3540  
H 1.3860 2.8390 3.2640  
O 0.8070 1.0840 1.6610  
Br -2.5300 3.8600 1.9720  
C -0.1990 1.8010 4.3400  
H 0.0800 2.2080 5.3180  
H 0.3060 0.8310 4.2410  
C -2.1580 1.0500 2.9160  
H -1.8220 0.0090 2.8450  
H -3.2440 1.0600 2.8320  
C -1.7120 1.6100 4.2750  
H -2.2150 2.5700 4.4470  
H -2.0420 0.9180 5.0610

**I4a\_Al cat. 2' (1,2-diaxial conformation)**

C 1.9010 1.1270 -2.0160  
C 1.2070 1.3620 -3.2590  
N 1.9600 -0.2140 -1.7590



C 1. 2870 -0. 8240 -2. 7810  
C 0. 8420 0. 1510 -3. 7380  
C 2. 4310 2. 1420 -1. 2160  
H 1. 0340 2. 3360 -3. 6930  
C 4. 7860 -0. 0810 2. 3850  
C 3. 2400 1. 9010 -0. 1040  
H 0. 2980 -0. 0800 -4. 6450  
N 3. 5520 0. 6650 0. 3970  
C 3. 8210 2. 9270 0. 7230  
C 4. 3160 0. 8880 1. 5120  
C 4. 5080 2. 2970 1. 7090  
C 4. 5040 -1. 4370 2. 3120  
N 3. 7250 -2. 0270 1. 3570  
C 3. 6750 -3. 3550 1. 6750  
C 4. 9610 -2. 4190 3. 2590  
C 4. 4430 -3. 6100 2. 8650  
C 1. 0110 -2. 1770 -2. 8760  
C 1. 3790 -3. 1370 -1. 9450  
N 2. 1070 -2. 8960 -0. 8140  
C 2. 2750 -4. 1080 -0. 2050  
C 1. 0630 -4. 5370 -2. 0440  
C 1. 6150 -5. 1390 -0. 9600  
C 2. 9920 -4. 3280 0. 9610  
H 3. 7130 3. 9900 0. 5610  
H 5. 0800 2. 7360 2. 5160  
H 5. 5940 -2. 2060 4. 1110  
H 4. 5630 -4. 5830 3. 3250  
H 0. 5050 -4. 9870 -2. 8550  
H 1. 5970 -6. 1870 -0. 6890  
C -4. 3370 2. 5270 0. 2670  
C -4. 5790 3. 6930 -0. 6980  
C -3. 5300 4. 8100 -0. 6030  
C -2. 1170 4. 2740 -0. 8020  
C 1. 9490 3. 5350 -1. 4580  
C 0. 5820 3. 7620 -1. 2420  
C 0. 0520 5. 0450 -1. 3730

C 0.8890 6.1060 -1.7380  
C 2.2380 5.8710 -1.9680  
C 2.7790 4.5910 -1.8300  
C -9.6390 -1.6020 2.0770  
C -8.7510 -1.6440 0.8350  
C -7.2700 -1.4560 1.1830  
H -2.3290 -1.7750 0.3750  
C -4.3590 -2.3410 0.9850  
C -2.8470 -2.2460 1.2170  
C -2.2500 -3.6330 1.4760  
C -0.7350 -3.5830 1.6510  
H -2.7210 -4.0800 2.3620  
H -0.3230 -4.5860 1.8030  
O -1.2570 5.3480 -1.1640  
H -0.0380 2.9070 -0.9880  
H 3.8340 4.4140 -2.0110  
H 2.8790 6.6960 -2.2620  
H 0.4650 7.1000 -1.8410  
C -5.1650 1.2820 -0.0820  
C -4.6370 0.0770 0.6930  
N -4.9410 -1.2780 0.0790  
C -4.3080 -1.3260 -1.3130  
C -2.4810 -3.7420 -3.6900  
C -3.0510 -2.4430 -3.1280  
C -3.8750 -2.6810 -1.8540  
H -1.8960 -3.5540 -4.5970  
H -3.6700 -1.9450 -3.8850  
H -3.2290 -3.2060 -1.1470  
H -5.0440 1.1110 -1.1560  
H -6.2340 1.4440 0.1040  
H -5.0150 0.0540 1.7180  
H -3.5460 0.1330 0.7180  
C -6.4260 -1.5030 -0.0830  
H -3.2890 2.2230 0.1860  
H -4.5200 2.8400 1.3040  
H -4.5610 3.2990 -1.7230

H -5.5790 4.1180 -0.5440  
H -3.5990 5.3280 0.3620  
H -3.7300 5.5550 -1.3810  
H -2.1010 3.4960 -1.5770  
H -1.7430 3.8080 0.1180  
H -8.8840 -2.6040 0.3200  
H -7.1450 -0.4940 1.6930  
H -9.5480 -0.6380 2.5900  
H -10.6910 -1.7450 1.8140  
H -9.3590 -2.3880 2.7870  
H -9.0630 -0.8640 0.1310  
H -6.9740 -2.2410 1.8870  
H -4.6340 -3.2990 0.5390  
H -4.8890 -2.2600 1.9350  
H -2.6420 -1.5980 2.0750  
H -2.4940 -4.2950 0.6330  
H -0.4550 -2.9640 2.5090  
H -0.2520 -3.1480 0.7710  
H -3.4390 -0.6640 -1.2750  
H -5.0370 -0.8810 -1.9930  
H -3.2750 -4.4530 -3.9460  
H -1.8220 -4.2200 -2.9570  
H -2.2320 -1.7550 -2.8800  
H -4.7320 -3.3340 -2.0660  
H -6.5300 -2.4720 -0.5790  
H -6.7720 -0.7350 -0.7800  
H 0.4440 -2.5100 -3.7390  
H 5.3970 0.2560 3.2160  
H 3.0440 -5.3470 1.3310  
C 0.6670 -0.0550 1.5170  
O -0.2860 -0.2760 2.4210  
O 1.2530 -0.9630 0.9560  
Al 2.9180 -1.1310 -0.2640  
Br 4.9360 -1.5150 -1.5890  
C -0.5450 0.9830 3.0960  
C -0.1190 1.9790 2.0180

H -1.6170 1.0300 3.2930  
H -0.8990 2.0640 1.2560  
C 0.3820 3.3310 2.4760  
H -0.5030 3.9470 2.6810  
H 0.9060 3.8000 1.6360  
O 0.9390 1.2260 1.3800  
Br -1.4190 0.6010 -0.8750  
C 1.2570 3.2600 3.7260  
H 1.4940 4.2750 4.0630  
H 2.2090 2.7710 3.4830  
C 0.2880 1.0370 4.3780  
H 1.2550 0.5590 4.1800  
H -0.2060 0.4490 5.1580  
C 0.5430 2.4780 4.8310  
H -0.4060 2.9720 5.0810  
H 1.1440 2.4650 5.7460

**I3b\_A1 cat. 2' (1,2-diaxial conformation)**

C -2.2200 0.3450 2.3500  
C -1.6060 -0.1080 3.5730  
N -2.8750 -0.6990 1.7450  
C -2.6810 -1.7880 2.5520  
C -1.8920 -1.4280 3.6940  
C -2.1520 1.6570 1.8690  
H -1.0350 0.5130 4.2470  
C -4.9020 1.7850 -2.1260  
C -2.8210 2.0970 0.7220  
H -1.6040 -2.1100 4.4840  
N -3.6190 1.3250 -0.0830  
C -2.7580 3.4400 0.2030  
C -4.0740 2.1520 -1.0740  
C -3.5450 3.4740 -0.9000  
C -5.3680 0.5060 -2.3780  
N -5.0910 -0.5950 -1.6180  
C -5.6950 -1.6480 -2.2430  
C -6.1800 0.1400 -3.5110

C -6.3800 -1.1980 -3.4280  
C -3.1510 -3.0710 2.3080  
C -3.8860 -3.4630 1.2020  
N -4.3000 -2.6310 0.1980  
C -5.0030 -3.4160 -0.6760  
C -4.3180 -4.8110 0.9440  
C -5.0070 -4.7830 -0.2240  
C -5.6500 -2.9670 -1.8170  
H -2.1730 4.2420 0.6280  
H -3.7440 4.3100 -1.5570  
H -6.5350 0.8320 -4.2620  
H -6.9390 -1.8390 -4.0970  
H -4.1120 -5.6570 1.5870  
H -5.4900 -5.6010 -0.7420  
C 6.0520 -0.1690 2.4080  
C 4.6410 0.0700 2.9530  
C 4.2560 1.5360 3.1500  
C 2.7610 1.6130 3.3950  
C -1.2600 2.6150 2.5840  
C 0.1050 2.3240 2.6350  
C 0.9860 3.1890 3.2840  
C 0.5010 4.3660 3.8580  
C -0.8570 4.6560 3.7990  
C -1.7460 3.7810 3.1780  
C 8.8440 -5.6830 -0.4800  
C 7.4770 -5.4470 0.1580  
C 6.8040 -4.1780 -0.3760  
H 2.6190 -1.4660 -1.5790  
C 4.4300 -2.6650 -1.5430  
C 3.6200 -1.4710 -2.0250  
C 3.5090 -1.4950 -3.5520  
C 2.8900 -0.2070 -4.0910  
H 4.5050 -1.6280 -3.9950  
H 2.7650 -0.2480 -5.1770  
O 2.3290 2.9720 3.3630  
H 0.4590 1.4370 2.1240

H -2.8100 3.9980 3.1540  
H -1.2300 5.5660 4.2590  
H 1.1990 5.0350 4.3520  
C 6.1480 -1.5560 1.7520  
C 5.5160 -1.5150 0.3520  
N 4.6960 -2.7320 -0.0540  
C 3.4000 -2.6850 0.7350  
C 0.0610 -4.5820 1.1080  
C 1.1220 -3.4990 1.2890  
C 2.3550 -3.7420 0.4090  
H -0.8350 -4.3540 1.6920  
H 1.4270 -3.4670 2.3430  
H 2.0510 -3.6800 -0.6430  
H 5.6460 -2.2720 2.4110  
H 7.1900 -1.8860 1.6800  
H 6.2900 -1.3970 -0.4090  
H 4.8340 -0.6620 0.2680  
C 5.4200 -4.0230 0.2450  
H 6.2990 0.6010 1.6670  
H 6.7950 -0.0860 3.2090  
H 3.9200 -0.3500 2.2440  
H 4.5180 -0.4890 3.8920  
H 4.4730 2.0830 2.2270  
H 4.8170 2.0020 3.9690  
H 2.4860 1.1760 4.3660  
H 2.2660 1.0320 2.6150  
H 6.8270 -6.3110 -0.0290  
H 7.4380 -3.3160 -0.1430  
H 9.5180 -4.8410 -0.2900  
H 9.3120 -6.5860 -0.0780  
H 8.7540 -5.8050 -1.5650  
H 7.5870 -5.3660 1.2470  
H 6.7350 -4.2460 -1.4660  
H 3.9390 -3.6040 -1.8120  
H 5.4100 -2.6570 -2.0230  
H 4.0890 -0.5350 -1.7110

H 2.9100 -2.3590 -3.8690  
H 3.5190 0.6580 -3.8530  
H 1.9060 -0.0310 -3.6450  
H 2.9640 -1.6890 0.5890  
H 3.6910 -2.7720 1.7850  
H 0.4380 -5.5600 1.4270  
H -0.2430 -4.6730 0.0590  
H 0.7140 -2.5090 1.0590  
H 2.7290 -4.7570 0.5840  
H 4.7710 -4.8310 -0.0990  
H 5.4860 -4.0970 1.3320  
H -2.9110 -3.8330 3.0440  
H -5.1880 2.5650 -2.8240  
H -6.1780 -3.7040 -2.4140  
Al -4.0900 -0.6200 0.1380  
Br -6.0790 -0.1840 1.4380  
C 2.8520 3.2070 -1.8920  
C 2.2310 3.2500 -0.4870  
H 3.5390 2.3650 -1.9470  
H 3.0220 3.3850 0.2550  
C 1.1700 4.3400 -0.3580  
H 1.6720 5.3140 -0.3940  
H 0.6990 4.2480 0.6260  
O 1.5770 2.0060 -0.2550  
Br 4.0410 4.7820 -2.1000  
C 0.1220 4.2500 -1.4710  
H -0.6040 5.0640 -1.3670  
H -0.4350 3.3140 -1.3540  
C 1.8130 3.1830 -3.0040  
H 1.3150 2.2080 -2.9350  
H 2.3080 3.2240 -3.9790  
C 0.7690 4.2910 -2.8580  
H 1.2500 5.2650 -3.0150  
H 0.0070 4.1790 -3.6370  
O 1.6960 -0.0880 0.4160  
C 2.3690 0.9120 0.0850

O 3.6090 1.0480 0.0280  
C -1.3960 -1.9260 -0.9250  
C -1.0960 -0.4870 -0.9030  
H -1.4330 -2.4460 0.0290  
H -0.8840 -0.0270 0.0550  
C -0.5730 0.2160 -2.1220  
H 0.5010 0.3490 -1.9600  
H -1.0180 1.2170 -2.1640  
O -2.4600 -0.9550 -1.0510  
C -0.8530 -0.5700 -3.4050  
H -0.3390 -0.0940 -4.2460  
H -1.9270 -0.5410 -3.6270  
C -1.1780 -2.7650 -2.1640  
H -2.1650 -3.0690 -2.5320  
H -0.6500 -3.6830 -1.8830  
C -0.3950 -2.0230 -3.2550  
H 0.6730 -2.0280 -2.9930  
H -0.4910 -2.5590 -4.2050

**TS3b\_AI cat. 2' (1,2-diaxial conformation)**

C 2.2940 0.6370 -2.1910  
C 1.5220 0.3470 -3.3760  
N 2.9200 -0.5000 -1.7610  
C 2.5690 -1.4940 -2.6320  
C 1.6890 -0.9740 -3.6430  
C 2.3810 1.8970 -1.5840  
H 0.9410 1.0680 -3.9340  
C 5.3210 1.3860 2.2410  
C 3.1430 2.1700 -0.4400  
H 1.2710 -1.5510 -4.4570  
N 3.8890 1.2560 0.2510  
C 3.2290 3.4580 0.2100  
C 4.4530 1.9240 1.2980  
C 4.0420 3.3030 1.2840  
C 5.7710 0.0750 2.2860  
N 5.4060 -0.9100 1.4200



C 6.0670 -2.0350 1.8100  
C 6.6990 -0.4430 3.2640  
C 6.8840 -1.7530 2.9670  
C 2.9610 -2.8250 -2.5520  
C 3.8120 -3.3690 -1.6020  
N 4.3950 -2.6790 -0.5800  
C 5.1730 -3.5710 0.0940  
C 4.2230 -4.7520 -1.5650  
C 5.0710 -4.8770 -0.5130  
C 5.9610 -3.2780 1.2010  
H 2.7310 4.3590 -0.1180  
H 4.3480 4.0480 2.0080  
H 7.1430 0.1360 4.0640  
H 7.5120 -2.4760 3.4710  
H 3.9030 -5.5110 -2.2670  
H 5.5930 -5.7600 -0.1690  
C -6.1920 1.4170 -1.6850  
C -4.8260 1.5480 -2.3700  
C -4.0980 2.8670 -2.1200  
C -2.6920 2.7820 -2.6880  
C 1.5640 3.0080 -2.1560  
C 0.1710 2.9210 -2.0890  
C -0.6300 3.9760 -2.5240  
C -0.0360 5.1210 -3.0540  
C 1.3500 5.2000 -3.1420  
C 2.1530 4.1510 -2.7010  
C -10.3610 -3.5480 -0.0060  
C -9.0300 -3.5520 -0.7540  
C -7.9250 -2.8390 0.0330  
H -3.1100 -1.7730 1.3050  
C -5.1690 -2.4690 1.2180  
C -4.0310 -1.7190 1.8940  
C -3.7720 -2.3050 3.2860  
C -2.8210 -1.4310 4.1000  
H -4.7200 -2.4140 3.8280  
H -2.6100 -1.8780 5.0760

O -1.9900 3.9840 -2.3870  
H -0.2650 2.0340 -1.6450  
H 3.2340 4.2180 -2.7690  
H 1.8090 6.0890 -3.5640  
H -0.6710 5.9360 -3.3870  
C -6.5540 -0.0640 -1.4790  
C -5.8630 -0.5840 -0.2130  
N -5.4820 -2.0570 -0.2050  
C -4.2670 -2.2180 -1.1070  
C -1.6540 -4.8670 -2.1400  
C -2.3930 -3.5320 -2.0720  
C -3.5480 -3.5590 -1.0630  
H -0.7990 -4.8040 -2.8210  
H -2.7810 -3.2810 -3.0670  
H -3.1320 -3.7430 -0.0660  
H -6.2410 -0.6130 -2.3730  
H -7.6370 -0.2000 -1.3930  
H -6.5050 -0.4210 0.6550  
H -4.9270 -0.0500 -0.0450  
C -6.6050 -2.9260 -0.7250  
H -6.1810 1.9290 -0.7140  
H -6.9670 1.9090 -2.2820  
H -4.1720 0.7460 -2.0100  
H -4.9540 1.3850 -3.4480  
H -4.0250 3.0530 -1.0400  
H -4.6360 3.7140 -2.5630  
H -2.7090 2.6420 -3.7780  
H -2.1960 1.9160 -2.2410  
H -8.7240 -4.5860 -0.9570  
H -8.2210 -1.7960 0.1920  
H -10.7040 -2.5250 0.1810  
H -11.1350 -4.0620 -0.5830  
H -10.2700 -4.0550 0.9620  
H -9.1520 -3.0630 -1.7290  
H -7.8370 -3.3050 1.0200  
H -4.9650 -3.5430 1.1890

H -6.0900 -2.3230 1.7830  
H -4.2850 -0.6590 1.9950  
H -3.3530 -3.3140 3.1800  
H -3.2530 -0.4380 4.2690  
H -1.8670 -1.2950 3.5800  
H -3.5750 -1.4200 -0.8330  
H -4.6250 -2.0220 -2.1210  
H -2.3140 -5.6650 -2.4980  
H -1.2750 -5.1650 -1.1560  
H -1.7030 -2.7290 -1.7870  
H -4.2190 -4.3920 -1.3030  
H -6.2340 -3.9520 -0.7110  
H -6.7520 -2.6430 -1.7690  
H 2.5790 -3.4960 -3.3160  
H 5.6920 2.0630 3.0050  
H 6.5400 -4.0920 1.6270  
Al 4.1120 -0.7200 -0.1300  
Br 6.0570 -0.1320 -1.5930  
C -2.4130 2.3600 2.0910  
C -1.3790 2.4070 0.9570  
H -3.1610 1.6010 1.8720  
H -1.8660 2.7200 0.0320  
C -0.1960 3.3110 1.2730  
H -0.5560 4.3450 1.2260  
H 0.5470 3.1930 0.4820  
O -0.8550 1.0760 0.7740  
Br -3.4470 4.0400 2.0100  
C 0.4220 3.0320 2.6430  
H 1.2290 3.7470 2.8280  
H 0.8800 2.0350 2.6410  
C -1.7900 2.1560 3.4660  
H -1.4130 1.1250 3.4830  
H -2.5650 2.2240 4.2360  
C -0.6330 3.1140 3.7490  
H -1.0200 4.1390 3.8180  
H -0.1910 2.8730 4.7210

O -1.2090 -1.0190 0.1220  
C -1.6760 0.1750 0.2010  
O -2.8030 0.4930 -0.1830  
C 0.6960 -1.4830 0.1980  
C 1.4830 -0.6440 1.1820  
H 0.8620 -1.2500 -0.8470  
H 1.4370 0.4170 0.9080  
C 0.9780 -0.8460 2.6100  
H -0.0140 -0.3860 2.6980  
H 1.6530 -0.3100 3.2880  
O 2.7290 -1.2060 0.9950  
C 0.9120 -2.3300 2.9810  
H 0.5070 -2.4480 3.9930  
H 1.9300 -2.7350 2.9880  
C 0.5200 -2.9240 0.5430  
H 1.5130 -3.3620 0.3900  
H -0.1580 -3.3980 -0.1700  
C 0.0570 -3.1270 1.9880  
H -0.9900 -2.8080 2.0620  
H 0.0850 -4.1950 2.2320

**I4b\_A1 cat. 2' (1,2-diaxial conformation)**

C 2.1050 0.4620 -2.2220  
C 1.2570 0.1010 -3.3350  
N 2.7000 -0.6600 -1.7170  
C 2.2560 -1.7120 -2.4670  
C 1.3470 -1.2460 -3.4790  
C 2.2780 1.7670 -1.7380  
H 0.6820 0.7940 -3.9320  
C 5.3920 1.4650 1.9710  
C 3.1130 2.1070 -0.6650  
H 0.8610 -1.8770 -4.2120  
N 3.8650 1.2280 0.0620  
C 3.2780 3.4420 -0.1320  
C 4.5060 1.9580 1.0190  
C 4.1430 3.3470 0.9070

C 5.7790 0.1410 2.1210  
N 5.3290 -0.9000 1.3680  
C 5.9510 -2.0170 1.8360  
C 6.7250 -0.3320 3.1060  
C 6.8340 -1.6720 2.9270  
C 2.5950 -3.0470 -2.2820  
C 3.4700 -3.5450 -1.3270  
N 4.1310 -2.7960 -0.4010  
C 4.9080 -3.6590 0.3120  
C 3.8270 -4.9370 -1.1870  
C 4.7220 -5.0070 -0.1710  
C 5.7610 -3.3040 1.3500  
H 2.7940 4.3320 -0.5090  
H 4.5120 4.1370 1.5480  
H 7.2330 0.2950 3.8270  
H 7.4480 -2.3760 3.4720  
H 3.4400 -5.7390 -1.8030  
H 5.2240 -5.8800 0.2260  
C -6.2210 1.1640 -1.6520  
C -4.8460 1.3150 -2.3110  
C -4.1810 2.6810 -2.1550  
C -2.7910 2.6170 -2.7610  
C 1.4600 2.8530 -2.3540  
C 0.0710 2.7940 -2.2220  
C -0.7400 3.8200 -2.7000  
C -0.1610 4.9200 -3.3310  
C 1.2210 4.9740 -3.4800  
C 2.0340 3.9490 -3.0020  
C -9.9210 -4.2650 -0.0390  
C -8.5690 -4.1110 -0.7320  
C -7.5990 -3.2430 0.0760  
H -2.9380 -1.6820 1.5050  
C -4.9110 -2.5600 1.3340  
C -3.8990 -1.6590 2.0250  
C -3.6940 -2.0870 3.4820  
C -2.8490 -1.0680 4.2450

H -4.6660 -2.1990 3.9790  
H -2.6680 -1.3930 5.2740  
O -2.0960 3.8340 -2.5080  
H -0.3560 1.9450 -1.7020  
H 3.1110 3.9980 -3.1230  
H 1.6710 5.8270 -3.9800  
H -0.8020 5.7160 -3.6950  
C -6.5270 -0.3200 -1.3880  
C -5.8090 -0.7720 -0.1090  
N -5.2510 -2.1870 -0.0970  
C -4.0160 -2.1910 -0.9850  
C -1.1820 -4.5140 -2.2080  
C -2.0470 -3.2670 -2.0400  
C -3.1650 -3.4520 -1.0030  
H -0.3900 -4.3340 -2.9410  
H -2.4950 -3.0080 -3.0080  
H -2.7140 -3.6300 -0.0200  
H -6.2030 -0.8890 -2.2660  
H -7.6030 -0.4920 -1.2880  
H -6.4810 -0.6920 0.7480  
H -4.9490 -0.1300 0.0810  
C -6.2500 -3.1870 -0.6330  
H -6.2540 1.7190 -0.7050  
H -6.9990 1.5950 -2.2900  
H -4.1610 0.5760 -1.8800  
H -4.9390 1.0630 -3.3770  
H -4.0910 2.9350 -1.0910  
H -4.7710 3.4730 -2.6320  
H -2.8380 2.4520 -3.8470  
H -2.2630 1.7680 -2.3150  
H -8.1240 -5.1010 -0.8950  
H -8.0290 -2.2430 0.1920  
H -10.3970 -3.2900 0.1150  
H -10.5980 -4.8800 -0.6380  
H -9.8080 -4.7420 0.9410  
H -8.7120 -3.6640 -1.7240

H -7.4920 -3.6700 1.0790  
H -4.5610 -3.5950 1.3110  
H -5.8550 -2.5400 1.8800  
H -4.2440 -0.6200 2.0170  
H -3.2100 -3.0700 3.5130  
H -3.3510 -0.0940 4.2820  
H -1.8760 -0.9230 3.7640  
H -3.4090 -1.3430 -0.6660  
H -4.3820 -1.9800 -1.9920  
H -1.7780 -5.3650 -2.5550  
H -0.7010 -4.8010 -1.2670  
H -1.4220 -2.4150 -1.7470  
H -3.7510 -4.3410 -1.2650  
H -5.7660 -4.1640 -0.5830  
H -6.3920 -2.9450 -1.6880  
H 2.1490 -3.7650 -2.9640  
H 5.8260 2.1870 2.6550  
H 6.3250 -4.1020 1.8230  
Al 3.9450 -0.7930 -0.1150  
Br 5.8910 -0.4850 -1.7440  
C -2.2910 2.7360 2.0490  
C -1.2840 2.6980 0.8920  
H -3.0360 1.9530 1.9190  
H -1.7910 2.9030 -0.0530  
C -0.1070 3.6390 1.0950  
H -0.4850 4.6600 0.9720  
H 0.6170 3.4640 0.2960  
O -0.7300 1.3590 0.8310  
Br -3.3430 4.3910 1.8400  
C 0.5480 3.4770 2.4670  
H 1.3550 4.2090 2.5700  
H 1.0150 2.4860 2.5350  
C -1.6370 2.6600 3.4220  
H -1.2550 1.6360 3.5300  
H -2.3960 2.7970 4.1980  
C -0.4790 3.6460 3.5900

H -0.8730 4.6710 3.5800  
H -0.0100 3.4920 4.5670  
O -1.0460 -0.8230 0.4770  
C -1.5360 0.3930 0.4040  
O -2.6780 0.5880 0.0170  
C 0.3770 -1.2430 0.4230  
C 1.3970 -0.4660 1.2930  
H 0.6450 -1.1480 -0.6280  
H 1.4110 0.5880 0.9850  
C 0.9850 -0.5600 2.7690  
H 0.0090 -0.0740 2.9080  
H 1.7120 -0.0030 3.3700  
O 2.6180 -1.0730 1.1030  
C 0.9200 -2.0200 3.2270  
H 0.5800 -2.0790 4.2690  
H 1.9310 -2.4380 3.1890  
C 0.3390 -2.7030 0.8470  
H 1.3320 -3.1100 0.6420  
H -0.3810 -3.2470 0.2290  
C -0.0020 -2.8580 2.3330  
H -1.0450 -2.5540 2.4920  
H 0.0590 -3.9160 2.6130

**I3a\_A1 cat. 2' (1,2-diequatorial conformation)**

C 2.0010 0.8290 -2.2930  
C 1.4660 0.8370 -3.6340  
N 2.0840 -0.4520 -1.8340  
C 1.6110 -1.2540 -2.8310  
C 1.2490 -0.4580 -3.9750  
C 2.3940 1.9770 -1.5960  
H 1.3060 1.7240 -4.2300  
C 4.2030 0.4540 2.6290  
C 3.0470 1.9520 -0.3590  
H 0.8690 -0.8540 -4.9080  
N 3.2610 0.8340 0.3980  
C 3.5680 3.1130 0.3260



C 3.8870 1.2520 1.5360  
C 4.1090 2.6720 1.4870  
C 3.8990 -0.8920 2.7660  
N 3.2690 -1.6590 1.8280  
C 3.1750 -2.9120 2.3600  
C 4.2000 -1.6820 3.9330  
C 3.7450 -2.9350 3.6830  
C 1.4210 -2.6270 -2.7420  
C 1.6050 -3.4010 -1.6050  
N 2.0720 -2.9410 -0.4080  
C 2.1160 -4.0190 0.4290  
C 1.3210 -4.8120 -1.5160  
C 1.6260 -5.1920 -0.2480  
C 2.6180 -4.0120 1.7230  
H 3.5190 4.1270 -0.0450  
H 4.5990 3.2480 2.2620  
H 4.6950 -1.3090 4.8200  
H 3.7890 -3.8090 4.3210  
H 0.9510 -5.4240 -2.3280  
H 1.5550 -6.1760 0.1960  
C -3.9700 1.9160 -0.4440  
C -4.4960 3.0110 -1.3800  
C -3.6100 4.2690 -1.4130  
C -2.1690 3.8740 -1.6910  
C 1.8990 3.2950 -2.0950  
C 0.5180 3.4880 -1.9720  
C -0.0590 4.7220 -2.2650  
C 0.7490 5.7630 -2.7340  
C 2.1130 5.5550 -2.8910  
C 2.7010 4.3280 -2.5710  
C -8.5090 -2.9960 0.5600  
C -7.4000 -2.8790 -0.4830  
C -6.0590 -2.4860 0.1450  
H -0.9420 -2.2450 0.3570  
C -3.0410 -2.8140 0.5530  
C -1.7080 -2.3600 1.1270

C -1.2060 -3.3310 2.2040  
C -0.2440 -2.6190 3.1550  
H -2.0550 -3.7330 2.7740  
H 0.1820 -3.3120 3.8880  
O -1.3880 4.9830 -2.1040  
H -0.0650 2.6540 -1.5990  
H 3.7710 4.1820 -2.6810  
H 2.7330 6.3660 -3.2630  
H 0.2950 6.7220 -2.9650  
C -4.5270 0.5200 -0.7490  
C -3.7590 -0.5010 0.0910  
N -3.6330 -1.8930 -0.4980  
C -2.7200 -1.8100 -1.7110  
C -1.4610 -4.2500 -4.4440  
C -1.9080 -2.9500 -3.7820  
C -2.2830 -3.1440 -2.3100  
H -1.1720 -4.0820 -5.4860  
H -2.7760 -2.5480 -4.3220  
H -1.4220 -3.5410 -1.7600  
H -4.3810 0.3400 -1.8190  
H -5.6050 0.4640 -0.5620  
H -4.2070 -0.6140 1.0800  
H -2.7360 -0.1510 0.2250  
C -4.9820 -2.4180 -0.9310  
H -2.8860 1.8250 -0.5550  
H -4.1480 2.1750 0.6080  
H -4.5420 2.6050 -2.4010  
H -5.5220 3.2850 -1.1110  
H -3.6680 4.8130 -0.4630  
H -3.9640 4.9450 -2.1980  
H -2.1310 3.0960 -2.4680  
H -1.7270 3.4510 -0.7840  
H -7.2890 -3.8340 -1.0120  
H -6.1740 -1.5200 0.6490  
H -8.6570 -2.0450 1.0830  
H -9.4580 -3.2730 0.0910

H -8.2670 -3.7580 1.3080  
H -7.6800 -2.1340 -1.2380  
H -5.7990 -3.2240 0.9110  
H -2.9670 -3.8030 0.0940  
H -3.7800 -2.8710 1.3540  
H -1.8320 -1.3830 1.6000  
H -0.7110 -4.1870 1.7290  
H -0.7660 -1.8190 3.6940  
H 0.5730 -2.1550 2.5980  
H -1.8550 -1.2100 -1.4140  
H -3.2770 -1.2400 -2.4560  
H -2.2650 -4.9930 -4.4330  
H -0.6030 -4.6870 -3.9230  
H -1.1180 -2.1940 -3.8550  
H -3.0760 -3.8980 -2.2570  
H -4.8160 -3.4130 -1.3480  
H -5.3110 -1.7700 -1.7470  
H 1.0650 -3.1320 -3.6340  
H 4.7000 0.9370 3.4640  
H 2.6030 -4.9500 2.2690  
C 0.1270 0.3150 0.5930  
O -0.6850 0.5510 -0.3090  
O 0.9260 -0.6670 0.6720  
Al 2.6850 -1.0580 -0.0100  
Br 4.9550 -1.5720 -0.9070  
C -0.5800 2.3050 1.7220  
C -1.3490 2.3870 3.0310  
C -2.1440 3.6850 3.1280  
C -1.2110 4.8960 3.0000  
C -0.4140 4.8350 1.6960  
C 0.3470 3.5140 1.5890  
O 0.2030 1.1220 1.6950  
H -1.2930 2.2810 0.8950  
Br -2.5840 0.8490 3.1820  
H -0.6730 2.2630 3.8790  
H -2.8860 3.7090 2.3180

H -2.6930 3.7130 4.0730  
H -0.5180 4.9130 3.8510  
H -1.8040 5.8150 3.0520  
H -1.0960 4.9410 0.8420  
H 0.2910 5.6710 1.6370  
H 0.8650 3.4380 0.6300  
H 1.1150 3.4500 2.3700

**TS3a\_AI cat. 2' (1,2-diequatorial conformation)**

C -1.4640 0.6010 2.3880  
C -0.6570 0.4650 3.5750  
N -1.6940 -0.6260 1.8410  
C -1.0480 -1.5330 2.6300  
C -0.4300 -0.8640 3.7440  
C -1.9620 1.8190 1.9050  
H -0.3440 1.2820 4.2100  
C -4.8950 0.7220 -1.7750  
C -2.9410 1.9190 0.9120  
H 0.1070 -1.3550 4.5440  
N -3.4090 0.8740 0.1660  
C -3.5820 3.1430 0.4940  
C -4.3120 1.3980 -0.7100  
C -4.4630 2.8090 -0.4820  
C -4.5780 -0.5640 -2.1820  
N -3.6850 -1.3910 -1.5610  
C -3.6750 -2.5520 -2.2810  
C -5.1310 -1.2130 -3.3440  
C -4.5630 -2.4420 -3.4120  
C -0.8990 -2.8830 2.3350  
C -1.3020 -3.5000 1.1610  
N -1.9870 -2.8930 0.1450  
C -2.1960 -3.8520 -0.8040  
C -1.0410 -4.8770 0.8270  
C -1.5820 -5.0910 -0.4000  
C -2.9590 -3.6930 -1.9520  
H -3.3870 4.1230 0.9060

H -5.1310 3.4570 -1.0340  
H -5.8580 -0.7690 -4.0110  
H -4.7270 -3.2210 -4.1450  
H -0.5200 -5.5790 1.4650  
H -1.5980 -6.0050 -0.9790  
C 4.7170 1.6140 -0.0980  
C 5.2060 2.7770 0.7830  
C 4.1800 3.8930 1.0190  
C 2.8640 3.3990 1.5910  
C -1.2810 3.0640 2.3610  
C 0.0600 3.1850 1.9760  
C 0.7740 4.3450 2.2560  
C 0.1490 5.3930 2.9380  
C -1.1750 5.2610 3.3370  
C -1.8980 4.1010 3.0570  
C 8.3630 -2.3530 -1.4370  
C 7.2970 -2.8240 -0.4500  
C 5.9600 -2.1120 -0.6740  
H 0.7730 -2.3840 -0.5930  
C 2.8770 -2.8620 -0.9040  
C 1.5290 -2.3560 -1.3850  
C 1.0370 -3.1590 -2.5960  
C 0.0410 -2.3440 -3.4190  
H 1.8890 -3.4290 -3.2360  
H -0.3590 -2.9300 -4.2540  
O 2.0630 4.5430 1.8680  
H 0.5050 2.3670 1.4210  
H -2.9320 4.0030 3.3750  
H -1.6500 6.0740 3.8780  
H 0.7140 6.2950 3.1510  
C 4.2510 0.3930 0.7080  
C 3.5340 -0.5790 -0.2270  
N 3.5340 -2.0340 0.1920  
C 2.7820 -2.1470 1.4990  
C 2.0780 -4.9020 4.1320  
C 2.4430 -3.5360 3.5600

C 2. 6020 -3. 5630 2. 0370  
H 1. 9770 -4. 8600 5. 2200  
H 3. 3810 -3. 1840 4. 0090  
H 1. 7220 -4. 0220 1. 5750  
H 3. 5700 0. 7030 1. 5080  
H 5. 1230 -0. 0540 1. 2000  
H 3. 9560 -0. 5480 -1. 2320  
H 2. 4930 -0. 2730 -0. 3260  
C 4. 9470 -2. 5540 0. 3770  
H 3. 9080 1. 9340 -0. 7680  
H 5. 5250 1. 2890 -0. 7650  
H 5. 5400 2. 3800 1. 7520  
H 6. 0890 3. 2360 0. 3270  
H 3. 9690 4. 4080 0. 0740  
H 4. 6050 4. 6370 1. 7020  
H 3. 0150 2. 8380 2. 5250  
H 2. 3710 2. 7360 0. 8700  
H 7. 1550 -3. 9080 -0. 5480  
H 6. 1220 -1. 0310 -0. 6210  
H 8. 5410 -1. 2770 -1. 3370  
H 9. 3130 -2. 8680 -1. 2650  
H 8. 0560 -2. 5470 -2. 4710  
H 7. 6420 -2. 6440 0. 5760  
H 5. 6030 -2. 3320 -1. 6860  
H 2. 8230 -3. 8880 -0. 5300  
H 3. 5810 -2. 8460 -1. 7380  
H 1. 6360 -1. 3180 -1. 6940  
H 0. 5850 -4. 1010 -2. 2600  
H 0. 5330 -1. 4490 -3. 8170  
H -0. 7940 -2. 0100 -2. 7990  
H 1. 8110 -1. 6690 1. 3500  
H 3. 3440 -1. 5390 2. 2110  
H 2. 8470 -5. 6460 3. 8920  
H 1. 1290 -5. 2650 3. 7220  
H 1. 6800 -2. 7980 3. 8340  
H 3. 4590 -4. 2030 1. 7980

H 4.8780 -3.6430 0.3800  
H 5.2770 -2.2430 1.3710  
H -0.3860 -3.4980 3.0670  
H -5.6070 1.2740 -2.3810  
H -3.0450 -4.5450 -2.6180  
C -0.6170 0.7210 -1.0470  
O 0.5200 1.1690 -0.7440  
O -1.0810 -0.4090 -0.7710  
Al -2.7250 -1.0190 0.1620  
Br -4.7000 -1.7660 1.4730  
C 1.5080 3.8280 -1.5560  
C 0.6780 2.7250 -2.0970  
H 2.5590 3.7310 -1.8300  
C -0.7610 2.8400 -1.6480  
H -0.7910 3.1440 -0.5930  
O -1.3900 1.5820 -1.7530  
C -1.3820 3.9540 -2.4730  
H -2.4450 4.0440 -2.2300  
H -1.2930 3.7470 -3.5460  
C 0.9080 5.1010 -2.2340  
H 1.1760 5.0870 -3.2970  
H 1.3970 5.9770 -1.7950  
C -0.6180 5.2370 -2.0900  
H -0.8630 5.4940 -1.0520  
H -0.9570 6.0700 -2.7130  
H 1.4190 3.9100 -0.4690  
Br 2.3320 0.9540 -3.0170  
H 0.7490 2.6170 -3.1620

**I4a\_Al cat. 2' (1,2-diequatorial conformation)**

C 2.1480 1.7930 -1.9270  
C 1.8950 2.1050 -3.3100  
N 2.6420 0.5200 -1.8190  
C 2.7180 0.0300 -3.0910  
C 2.2790 1.0220 -4.0330  
C 1.9760 2.6900 -0.8740

H 1.5020 3.0460 -3.6690  
C 3.5240 0.4250 3.1100  
C 2.3940 2.4390 0.4350  
H 2.2530 0.8850 -5.1060  
N 2.8680 1.2380 0.8970  
C 2.3970 3.4080 1.4980  
C 3.1750 1.4300 2.2180  
C 2.9170 2.7900 2.5920  
C 3.5390 -0.9250 2.8100  
N 3.3310 -1.4610 1.5660  
C 3.4000 -2.8170 1.7240  
C 3.7240 -1.9730 3.7780  
C 3.6190 -3.1470 3.1080  
C 3.0670 -1.2720 -3.4300  
C 3.2330 -2.3040 -2.5240  
N 3.1530 -2.1730 -1.1620  
C 3.2870 -3.4340 -0.6510  
C 3.4190 -3.6880 -2.8770  
C 3.4280 -4.3910 -1.7180  
C 3.3510 -3.7480 0.6970  
H 2.0600 4.4300 1.4060  
H 3.0820 3.2020 3.5790  
H 3.9010 -1.8130 4.8330  
H 3.6970 -4.1540 3.4960  
H 3.5140 -4.0580 -3.8900  
H 3.5420 -5.4580 -1.5770  
C -4.9630 1.6550 -0.6210  
C -5.3410 2.8940 -1.4520  
C -4.4340 4.1150 -1.2600  
C -2.9620 3.8300 -1.4950  
C 1.2450 3.9650 -1.1340  
C -0.1490 3.8820 -1.2290  
C -0.9090 5.0410 -1.3780  
C -0.2680 6.2820 -1.4630  
C 1.1150 6.3520 -1.3920  
C 1.8820 5.1980 -1.2240



C -8.2340 -2.9830 -1.5280  
C -6.8450 -3.0050 -2.1620  
C -5.8020 -2.3130 -1.2800  
H -0.8060 -2.6620 0.0060  
C -2.9770 -2.8220 -0.0740  
C -1.6700 -2.6370 0.6770  
C -1.5230 -3.7310 1.7380  
C -0.1670 -3.6590 2.4360  
H -2.3280 -3.6010 2.4710  
H -0.0690 -4.4510 3.1860  
O -2.2650 5.0640 -1.4260  
H -0.6090 2.9040 -1.1550  
H 2.9640 5.2560 -1.1540  
H 1.6040 7.3190 -1.4650  
H -0.8720 7.1760 -1.5820  
C -4.1010 0.6490 -1.3980  
C -3.6550 -0.4780 -0.4710  
N -3.2930 -1.7850 -1.1470  
C -2.1050 -1.5320 -2.0460  
C 0.2790 -3.4800 -4.3760  
C -0.2810 -2.3390 -3.5320  
C -1.5540 -2.7430 -2.7840  
H 1.1750 -3.1590 -4.9150  
H -0.4930 -1.4750 -4.1750  
H -1.3150 -3.5550 -2.0880  
H -3.2270 1.1450 -1.8340  
H -4.6990 0.2780 -2.2370  
H -4.4050 -0.7080 0.2860  
H -2.7620 -0.1720 0.0700  
C -4.4470 -2.3090 -1.9760  
H -4.4530 1.9540 0.3040  
H -5.8720 1.1360 -0.2970  
H -5.3650 2.6220 -2.5160  
H -6.3610 3.2010 -1.1970  
H -4.5470 4.5030 -0.2400  
H -4.7500 4.9120 -1.9420

H -2.7890 3.3670 -2.4790  
H -2.5900 3.1400 -0.7290  
H -6.5380 -4.0430 -2.3440  
H -6.1320 -1.2890 -1.0760  
H -8.5770 -1.9550 -1.3680  
H -8.9640 -3.4870 -2.1680  
H -8.2300 -3.4890 -0.5570  
H -6.8800 -2.5120 -3.1420  
H -5.7460 -2.8290 -0.3150  
H -2.9930 -3.7930 -0.5740  
H -3.7950 -2.7750 0.6460  
H -1.6820 -1.6780 1.2010  
H -1.6510 -4.7180 1.2730  
H -0.0380 -2.6970 2.9400  
H 0.6540 -3.7660 1.7180  
H -1.3310 -1.0810 -1.4220  
H -2.4270 -0.7780 -2.7670  
H -0.4540 -3.8230 -5.1150  
H 0.5570 -4.3330 -3.7480  
H 0.4700 -2.0100 -2.8060  
H -2.2900 -3.1300 -3.4980  
H -4.1740 -3.3240 -2.2710  
H -4.4880 -1.7080 -2.8870  
H 3.1260 -1.5150 -4.4860  
H 3.7180 0.7130 4.1380  
H 3.4450 -4.7950 0.9650  
C 0.3110 -0.0780 0.8720  
O -0.6230 0.8440 0.6200  
O 0.9250 -0.6560 -0.0060  
Al 3.1840 -0.4480 -0.1530  
Br 5.5470 -0.0990 -0.4260  
C -1.8170 2.5080 2.1470  
C -1.2810 1.1240 1.8920  
H -2.6110 2.7740 1.4420  
C -0.1750 0.7980 2.8600  
H 0.5640 1.6080 2.8910

O 0.4790 -0.2960 2.1690  
C -0.7400 0.5500 4.2340  
H 0.0420 0.2720 4.9470  
H -1.4970 -0.2420 4.1950  
C -2.3940 2.4260 3.5820  
H -3.2590 1.7520 3.5590  
H -2.7510 3.4140 3.8860  
C -1.3900 1.8970 4.6280  
H -0.5970 2.6420 4.7810  
H -1.9040 1.7800 5.5870  
H -1.0210 3.2570 2.0650  
Br -4.0240 -1.1350 2.9900  
H -2.0940 0.3930 1.9940

**I3b\_AI cat. 2' (1,2-diequatorial conformation)**

C 2.1010 0.3910 -2.4900  
C 1.5120 0.1190 -3.7770  
N 2.6600 -0.7560 -1.9840  
C 2.4260 -1.7350 -2.9100  
C 1.7040 -1.1990 -4.0290  
C 2.0720 1.6340 -1.8510  
H 1.0170 0.8500 -4.3990  
C 4.4720 1.0840 2.3290  
C 2.6430 1.8760 -0.5970  
H 1.4000 -1.7690 -4.8980  
N 3.3700 0.9780 0.1380  
C 2.5120 3.1120 0.1330  
C 3.7140 1.6200 1.2950  
C 3.1790 2.9510 1.3040  
C 4.9800 -0.2020 2.3740  
N 4.7900 -1.1590 1.4170  
C 5.4060 -2.2850 1.8800  
C 5.7550 -0.7350 3.4650  
C 6.0250 -2.0280 3.1560  
C 2.8260 -3.0610 -2.8090  
C 3.5670 -3.6020 -1.7720

N 4.0240 -2.9080 -0.6850  
C 4.7400 -3.8050 0.0620  
C 3.9860 -4.9770 -1.6990  
C 4.7150 -5.1020 -0.5620  
C 5.3960 -3.5210 1.2490  
H 1.9750 3.9840 -0.2120  
H 3.3020 3.6630 2.1100  
H 6.0430 -0.1790 4.3480  
H 6.5800 -2.7580 3.7300  
H 3.7490 -5.7330 -2.4360  
H 5.2030 -5.9840 -0.1680  
C -6.2490 0.9340 -2.0020  
C -4.8360 0.9930 -2.5760  
C -4.2970 2.3930 -2.8750  
C -2.7990 2.2620 -3.0560  
C 1.3040 2.7390 -2.4950  
C -0.0720 2.5680 -2.6570  
C -0.8510 3.5910 -3.1980  
C -0.2420 4.7870 -3.5920  
C 1.1280 4.9470 -3.4380  
C 1.9110 3.9300 -2.8920  
C -9.6300 -4.5910 0.2400  
C -8.2570 -4.4510 -0.4140  
C -7.4340 -3.3220 0.2130  
H -2.8440 -1.4340 1.5560  
C -4.8220 -2.3220 1.4440  
C -3.8180 -1.3540 2.0500  
C -3.6730 -1.6510 3.5460  
C -2.8390 -0.5900 4.2550  
H -4.6670 -1.7010 4.0100  
H -2.7190 -0.8220 5.3180  
O -2.2010 3.5210 -3.3350  
H -0.5120 1.6460 -2.2990  
H 2.9820 4.0590 -2.7720  
H 1.5950 5.8770 -3.7490  
H -0.8600 5.5780 -4.0060

C -6.5630 -0.4780 -1.4860  
C -5.8530 -0.7480 -0.1490  
N -5.1730 -2.1050 -0.0130  
C -3.9270 -2.0790 -0.8790  
C -0.8340 -4.2080 -1.7660  
C -1.7720 -3.0080 -1.6740  
C -3.0140 -3.2950 -0.8180  
H 0.0690 -3.9570 -2.3320  
H -2.0860 -2.7170 -2.6840  
H -2.6890 -3.4920 0.2110  
H -6.2600 -1.1910 -2.2610  
H -7.6420 -0.6120 -1.3590  
H -6.5640 -0.6820 0.6760  
H -5.0680 -0.0050 0.0300  
C -6.0690 -3.2370 -0.4590  
H -6.3470 1.6550 -1.1820  
H -6.9860 1.2160 -2.7630  
H -4.1480 0.5380 -1.8560  
H -4.7930 0.3780 -3.4870  
H -4.4890 3.0510 -2.0200  
H -4.7720 2.8340 -3.7590  
H -2.5550 1.5610 -3.8690  
H -2.3940 1.8470 -2.1320  
H -7.7090 -5.3970 -0.3240  
H -7.9810 -2.3790 0.1040  
H -10.2110 -3.6680 0.1360  
H -10.2020 -5.4030 -0.2210  
H -9.5350 -4.8090 1.3090  
H -8.3790 -4.2600 -1.4880  
H -7.3290 -3.5150 1.2860  
H -4.4670 -3.3520 1.5290  
H -5.7660 -2.2550 1.9890  
H -4.1370 -0.3170 1.9120  
H -3.2160 -2.6400 3.6840  
H -3.3040 0.3970 4.1680  
H -1.8430 -0.5130 3.8100

H -3.3580 -1.1840 -0.5980  
H -4.2820 -1.9400 -1.9030  
H -1.3210 -5.0550 -2.2630  
H -0.5200 -4.5470 -0.7710  
H -1.2520 -2.1390 -1.2540  
H -3.5090 -4.2010 -1.1860  
H -5.5110 -4.1580 -0.2800  
H -6.1890 -3.1340 -1.5390  
H 2.5490 -3.7250 -3.6220  
H 4.6790 1.7320 3.1740  
H 5.9270 -4.3350 1.7330  
Al 3.8380 -0.9240 -0.3520  
Br 5.8600 -0.3380 -1.5380  
C 1.0710 -2.2690 0.5570  
C 0.8640 -0.8190 0.7030  
H 1.0360 -2.6850 -0.4470  
H 0.6430 -0.2430 -0.1900  
C 0.4650 -0.2190 2.0160  
H -0.6050 -0.0000 1.9610  
H 0.9690 0.7470 2.1280  
O 2.1970 -1.3860 0.7340  
C 0.7830 -1.1490 3.1870  
H 0.3660 -0.7240 4.1060  
H 1.8680 -1.2140 3.3270  
C 0.8510 -3.2220 1.7100  
H 1.8260 -3.6480 1.9720  
H 0.2250 -4.0530 1.3670  
C 0.2060 -2.5450 2.9300  
H -0.8740 -2.4470 2.7530  
H 0.3260 -3.1860 3.8090  
C -2.3730 1.2460 0.2330  
O -3.5440 1.6080 0.4590  
O -1.9600 0.2070 -0.3300  
C -0.7610 5.1050 2.7670  
C -0.6470 3.6720 2.2610  
H -0.0110 5.2780 3.5450

C -1.6340 3.3590 1.1430  
H -2.6560 3.3620 1.5360  
O -1.3280 2.0790 0.6250  
C -1.4980 4.3930 0.0210  
H -2.2490 4.1660 -0.7420  
H -0.5170 4.2550 -0.4510  
C -0.6010 6.1050 1.6170  
H 0.4110 6.0230 1.1950  
H -0.7040 7.1240 2.0060  
C -1.6320 5.8290 0.5220  
H -2.6410 5.9920 0.9250  
H -1.5040 6.5270 -0.3120  
H -1.7460 5.2410 3.2310  
Br -0.9450 2.4400 3.7780  
H 0.3680 3.4430 1.9280

**TS3b\_AI cat. 2' (1,2-diequatorial conformation)**

C 2.1720 0.4640 -2.4160  
C 1.3900 0.1980 -3.6010  
N 2.6550 -0.7120 -1.9120  
C 2.1990 -1.7060 -2.7300  
C 1.4050 -1.1460 -3.7900  
C 2.3810 1.7350 -1.8680  
H 0.9070 0.9480 -4.2100  
C 5.1900 1.1220 2.0410  
C 3.1500 1.9840 -0.7250  
H 0.9420 -1.7150 -4.5860  
N 3.7990 1.0380 0.0190  
C 3.3470 3.2870 -0.1320  
C 4.4070 1.6990 1.0470  
C 4.1260 3.1070 0.9630  
C 5.4910 -0.2260 2.1630  
N 5.0460 -1.2080 1.3290  
C 5.5600 -2.3780 1.8010  
C 6.3220 -0.7930 3.1990  
C 6.3670 -2.1290 2.9730

C 2.4430 -3.0650 -2.5710  
C 3.2200 -3.6440 -1.5790  
N 3.8660 -2.9660 -0.5880  
C 4.5360 -3.8990 0.1460  
C 3.4790 -5.0590 -1.4620  
C 4.2990 -5.2170 -0.3930  
C 5.3320 -3.6330 1.2540  
H 2.9350 4.2110 -0.5110  
H 4.4880 3.8520 1.6600  
H 6.8010 -0.2260 3.9870  
H 6.8910 -2.8910 3.5360  
H 3.0860 -5.8160 -2.1290  
H 4.7190 -6.1310 0.0060  
C -6.0620 1.9550 -1.5140  
C -4.6590 1.8690 -2.1050  
C -3.9790 3.2130 -2.3840  
C -2.4820 2.9670 -2.4090  
C 1.6760 2.8880 -2.5010  
C 0.2800 2.9180 -2.4360  
C -0.4320 3.9940 -2.9640  
C 0.2570 5.0460 -3.5750  
C 1.6430 5.0060 -3.6510  
C 2.3600 3.9330 -3.1190  
C -10.2510 -3.3650 -0.9000  
C -8.7970 -3.3620 -1.3660  
C -7.9280 -2.4100 -0.5380  
H -3.2880 -1.3420 1.4750  
C -5.2060 -2.2520 0.9960  
C -4.2460 -1.5620 1.9560  
C -4.0280 -2.4920 3.1580  
C -3.2920 -1.8190 4.3120  
H -4.9970 -2.8610 3.5200  
H -3.1310 -2.5250 5.1330  
O -1.7870 4.1000 -2.9030  
H -0.2200 2.1000 -1.9330  
H 3.4430 3.9060 -3.1830



H 2.1730 5.8210 -4.1330  
H -0.3070 5.8790 -3.9820  
C -6.6670 0.5700 -1.2440  
C -6.0210 -0.1620 -0.0490  
N -5.4960 -1.5660 -0.3240  
C -4.2370 -1.4280 -1.1590  
C -1.4960 -3.5820 -2.8270  
C -2.3270 -2.3590 -2.4440  
C -3.4790 -2.7050 -1.4910  
H -0.6800 -3.2970 -3.4980  
H -2.7390 -1.9010 -3.3520  
H -3.0670 -3.1530 -0.5790  
H -6.5940 -0.0170 -2.1660  
H -7.7380 0.6790 -1.0470  
H -6.7380 -0.2690 0.7680  
H -5.1580 0.3910 0.3290  
C -6.5000 -2.4220 -1.0680  
H -6.0330 2.5310 -0.5800  
H -6.7280 2.4980 -2.1950  
H -4.0250 1.3210 -1.4020  
H -4.6900 1.2850 -3.0360  
H -4.2150 3.9380 -1.5960  
H -4.3150 3.6400 -3.3350  
H -2.2510 2.0970 -3.0430  
H -2.1540 2.7330 -1.3890  
H -8.3870 -4.3780 -1.3020  
H -8.3550 -1.4040 -0.5930  
H -10.6950 -2.3670 -0.9880  
H -10.8530 -4.0530 -1.5010  
H -10.3290 -3.6760 0.1470  
H -8.7500 -3.0720 -2.4230  
H -7.9670 -2.7210 0.5120  
H -4.8290 -3.2440 0.7400  
H -6.1740 -2.3850 1.4820  
H -4.6550 -0.6060 2.3000  
H -3.4650 -3.3760 2.8280

H -3.8680 -0.9720 4.7020  
H -2.3160 -1.4380 3.9970  
H -3.5780 -0.7480 -0.6170  
H -4.5540 -0.9350 -2.0800  
H -2.1100 -4.3330 -3.3380  
H -1.0490 -4.0540 -1.9460  
H -1.6900 -1.6020 -1.9720  
H -4.1230 -3.4540 -1.9650  
H -6.1050 -3.4390 -1.0420  
H -6.4850 -2.0960 -2.1100  
H 1.9980 -3.7330 -3.3030  
H 5.6090 1.7930 2.7850  
H 5.8080 -4.4810 1.7360  
Al 3.8240 -0.9650 -0.2730  
Br 5.8580 -0.7220 -1.7330  
C 0.3790 -1.1250 0.2720  
C 1.2930 -0.4680 1.2530  
H 0.5150 -0.8340 -0.7610  
H 1.4250 0.6000 1.0530  
C 0.9260 -0.7210 2.7100  
H 0.0340 -0.1380 2.9650  
H 1.7520 -0.3600 3.3330  
O 2.3680 -1.2500 0.8520  
C 0.6690 -2.2080 2.9690  
H 0.3530 -2.3570 4.0080  
H 1.6040 -2.7610 2.8270  
C -0.0420 -2.5330 0.5500  
H 0.8060 -3.1620 0.2540  
H -0.8760 -2.7900 -0.1050  
C -0.4010 -2.7550 2.0200  
H -1.3500 -2.2450 2.2170  
H -0.5650 -3.8240 2.1980  
C -1.8300 0.8050 0.6010  
O -2.9840 1.2410 0.5950  
O -1.4940 -0.3870 0.2840  
C -0.9020 4.1110 3.7340

|    |         |        |         |
|----|---------|--------|---------|
| C  | -0.7840 | 2.7620 | 3.0380  |
| H  | -0.7180 | 3.9870 | 4.8050  |
| C  | -1.0300 | 2.8650 | 1.5360  |
| H  | -2.0690 | 3.1510 | 1.3450  |
| O  | -0.7750 | 1.6020 | 0.9250  |
| C  | -0.0620 | 3.8760 | 0.9250  |
| H  | -0.2770 | 3.9660 | -0.1430 |
| H  | 0.9560  | 3.4760 | 1.0110  |
| C  | 0.0830  | 5.1100 | 3.1180  |
| H  | 1.1120  | 4.7710 | 3.3010  |
| H  | -0.0260 | 6.0810 | 3.6120  |
| C  | -0.1500 | 5.2390 | 1.6120  |
| H  | -1.1420 | 5.6780 | 1.4340  |
| H  | 0.5820  | 5.9200 | 1.1670  |
| H  | -1.9280 | 4.4860 | 3.6210  |
| Br | -2.0510 | 1.4800 | 3.8440  |
| H  | 0.1960  | 2.3100 | 3.2120  |

**I4b\_A1 cat. 2' (1,2-diequatorial conformation)**

|   |        |         |         |
|---|--------|---------|---------|
| C | 2.1610 | 0.5120  | -2.3740 |
| C | 1.3900 | 0.2610  | -3.5690 |
| N | 2.6550 | -0.6680 | -1.8900 |
| C | 2.2250 | -1.6480 | -2.7370 |
| C | 1.4260 | -1.0780 | -3.7880 |
| C | 2.3580 | 1.7760  | -1.8020 |
| H | 0.9030 | 1.0180  | -4.1680 |
| C | 5.1630 | 1.1120  | 2.1010  |
| C | 3.1230 | 2.0120  | -0.6530 |
| H | 0.9800 | -1.6360 | -4.6010 |
| N | 3.7620 | 1.0560  | 0.0840  |
| C | 3.3310 | 3.3100  | -0.0500 |
| C | 4.3750 | 1.7020  | 1.1180  |
| C | 4.1060 | 3.1140  | 1.0460  |
| C | 5.4810 | -0.2350 | 2.1960  |
| N | 5.0490 | -1.2050 | 1.3450  |
| C | 5.5840 | -2.3760 | 1.7870  |

C 6.3260 -0.8110 3.2180  
C 6.3910 -2.1400 2.9630  
C 2.5090 -3.0050 -2.6250  
C 3.3010 -3.5960 -1.6510  
N 3.9090 -2.9350 -0.6260  
C 4.5990 -3.8720 0.0830  
C 3.6040 -5.0060 -1.5820  
C 4.4120 -5.1770 -0.5070  
C 5.3810 -3.6200 1.2040  
H 2.9310 4.2420 -0.4240  
H 4.4760 3.8520 1.7470  
H 6.8000 -0.2540 4.0160  
H 6.9290 -2.9060 3.5060  
H 3.2440 -5.7500 -2.2810  
H 4.8550 -6.0910 -0.1340  
C -6.0730 2.0700 -1.2980  
C -4.6960 1.9780 -1.9460  
C -3.9970 3.3150 -2.2160  
C -2.5080 3.0370 -2.3130  
C 1.6550 2.9370 -2.4230  
C 0.2570 2.9620 -2.3760  
C -0.4530 4.0570 -2.8680  
C 0.2390 5.1280 -3.4420  
C 1.6250 5.0880 -3.5120  
C 2.3400 4.0010 -3.0060  
C -10.3150 -3.2770 -0.6940  
C -8.9160 -3.1730 -1.2970  
C -7.9730 -2.3410 -0.4190  
H -3.2140 -1.4770 1.3830  
C -5.1940 -2.2700 0.9710  
C -4.1590 -1.6570 1.9030  
C -3.9300 -2.6270 3.0690  
C -3.0080 -2.0580 4.1440  
H -4.8940 -2.8930 3.5220  
H -2.8350 -2.7960 4.9340  
O -1.8080 4.1680 -2.8000

H -0.2460 2.1230 -1.9130  
H 3.4240 3.9790 -3.0600  
H 2.1580 5.9180 -3.9670  
H -0.3220 5.9740 -3.8230  
C -6.6990 0.6870 -1.0630  
C -6.0210 -0.1170 0.0670  
N -5.5300 -1.5120 -0.2990  
C -4.3070 -1.3510 -1.1820  
C -1.7440 -3.4600 -3.1630  
C -2.5040 -2.2430 -2.6400  
C -3.5740 -2.6160 -1.6040  
H -0.9650 -3.1540 -3.8680  
H -2.9830 -1.7280 -3.4830  
H -3.0900 -3.0880 -0.7410  
H -6.6800 0.1440 -2.0140  
H -7.7570 0.8070 -0.8160  
H -6.7070 -0.2540 0.9050  
H -5.1380 0.4050 0.4410  
C -6.5830 -2.3110 -1.0410  
H -5.9980 2.6070 -0.3430  
H -6.7500 2.6530 -1.9320  
H -4.0440 1.3930 -1.2910  
H -4.7750 1.4240 -2.8920  
H -4.1830 4.0240 -1.4010  
H -4.3630 3.7730 -3.1410  
H -2.3230 2.1800 -2.9790  
H -2.1420 2.7650 -1.3150  
H -8.4970 -4.1780 -1.4310  
H -8.3830 -1.3310 -0.3190  
H -10.7680 -2.2860 -0.5740  
H -10.9730 -3.8720 -1.3350  
H -10.2840 -3.7550 0.2910  
H -8.9760 -2.7210 -2.2950  
H -7.9470 -2.7820 0.5830  
H -4.8660 -3.2610 0.6480  
H -6.1380 -2.3920 1.5040

H -4.4960 -0.6900 2.2910  
H -3.5020 -3.5600 2.6790  
H -3.4470 -1.1680 4.6070  
H -2.0380 -1.7760 3.7260  
H -3.6270 -0.6920 -0.6400  
H -4.6590 -0.8180 -2.0670  
H -2.4170 -4.1530 -3.6800  
H -1.2560 -4.0090 -2.3500  
H -1.8020 -1.5270 -2.1960  
H -4.2520 -3.3530 -2.0480  
H -6.1920 -3.3270 -1.1170  
H -6.6320 -1.9080 -2.0540  
H 2.0860 -3.6590 -3.3820  
H 5.5820 1.7740 2.8530  
H 5.8740 -4.4710 1.6650  
Al 3.7730 -0.9490 -0.2170  
Br 5.8500 -0.6210 -1.6800  
C 0.1440 -0.9840 0.1610  
C 1.2080 -0.6120 1.2310  
H 0.4430 -0.5870 -0.8100  
H 1.3470 0.4770 1.2470  
C 0.7360 -1.0970 2.6090  
H -0.1890 -0.5810 2.8990  
H 1.5000 -0.8230 3.3460  
O 2.3660 -1.2690 0.8850  
C 0.5350 -2.6160 2.6010  
H 0.1590 -2.9600 3.5730  
H 1.5110 -3.0870 2.4400  
C -0.0140 -2.4970 0.1200  
H 0.9520 -2.9050 -0.1850  
H -0.7490 -2.7720 -0.6400  
C -0.4210 -3.0580 1.4870  
H -1.4370 -2.7180 1.7220  
H -0.4610 -4.1530 1.4340  
C -1.6240 0.7310 0.6240  
O -2.8000 1.0460 0.5800

|    |         |         |         |
|----|---------|---------|---------|
| O  | -1.2420 | -0.5010 | 0.3720  |
| C  | -0.9020 | 3.9970  | 3.7820  |
| C  | -0.7560 | 2.6660  | 3.0520  |
| H  | -0.7470 | 3.8390  | 4.8530  |
| C  | -0.9450 | 2.8210  | 1.5460  |
| H  | -1.9810 | 3.0870  | 1.3160  |
| O  | -0.6290 | 1.5720  | 0.9050  |
| C  | 0.0310  | 3.8560  | 0.9980  |
| H  | -0.1410 | 3.9700  | -0.0750 |
| H  | 1.0480  | 3.4640  | 1.1170  |
| C  | 0.0920  | 5.0230  | 3.2260  |
| H  | 1.1180  | 4.6880  | 3.4290  |
| H  | -0.0430 | 5.9770  | 3.7470  |
| C  | -0.1000 | 5.1970  | 1.7200  |
| H  | -1.0900 | 5.6290  | 1.5240  |
| H  | 0.6380  | 5.8970  | 1.3160  |
| H  | -1.9260 | 4.3670  | 3.6510  |
| Br | -2.0530 | 1.3690  | 3.7790  |
| H  | 0.2170  | 2.2080  | 3.2450  |

**R\_Mg cat. 3'**

|   |         |         |         |
|---|---------|---------|---------|
| C | 1.6020  | 1.6460  | -1.6620 |
| C | 0.4820  | 1.7420  | -2.5770 |
| N | 2.2020  | 0.4290  | -1.8140 |
| C | 1.5150  | -0.2470 | -2.7780 |
| C | 0.4280  | 0.5690  | -3.2610 |
| C | 2.0250  | 2.6590  | -0.7780 |
| H | -0.1670 | 2.5990  | -2.6850 |
| C | 5.9940  | 1.0130  | 1.5120  |
| C | 3.1550  | 2.5920  | 0.0640  |
| H | -0.2730 | 0.2800  | -4.0350 |
| N | 4.0250  | 1.5420  | 0.1380  |
| C | 3.5410  | 3.6000  | 1.0320  |
| C | 4.9400  | 1.8390  | 1.1030  |
| C | 4.6490  | 3.1360  | 1.6660  |
| C | 6.2990  | -0.2670 | 1.0520  |

N 5.5750 -0.9560 0.1240  
C 6.1860 -2.1590 -0.0560  
C 7.4240 -1.0710 1.4820  
C 7.3560 -2.2410 0.7950  
C 1.8190 -1.5300 -3.2460  
C 2.8660 -2.3580 -2.8390  
N 3.7750 -2.0500 -1.8720  
C 4.6460 -3.0950 -1.7870  
C 3.1640 -3.6640 -3.3870  
C 4.2640 -4.1220 -2.7330  
C 5.7520 -3.1540 -0.9350  
H 3.0230 4.5330 1.2070  
H 5.2140 3.6160 2.4550  
H 8.1650 -0.7650 2.2100  
H 8.0310 -3.0860 0.8470  
H 2.6060 -4.1520 -4.1770  
H 4.7840 -5.0600 -2.8780  
C -5.4960 2.1070 0.3820  
C -5.4880 3.4170 -0.4240  
C -4.4310 4.4370 0.0050  
C -2.9940 3.9590 -0.1280  
C 1.2160 3.9130 -0.7370  
C -0.1260 3.8720 -0.3370  
C -0.8720 5.0510 -0.3100  
C -0.2770 6.2710 -0.6500  
C 1.0540 6.3050 -1.0360  
C 1.8010 5.1300 -1.0940  
C -9.2940 -1.9230 -1.7900  
C -7.8080 -2.1770 -2.0310  
C -6.9470 -1.6880 -0.8620  
H -2.7420 -2.0640 2.0010  
C -4.5880 -2.6700 0.9990  
C -3.7320 -2.4640 2.2440  
C -3.5940 -3.7910 2.9980  
C -3.0100 -3.6050 4.3960  
H -4.5780 -4.2730 3.0780



H -2.8740 -4.5690 4.8960  
O -2.1790 5.1160 0.0480  
H -0.5580 2.9270 -0.0130  
H 2.8380 5.1530 -1.4150  
H 1.5120 7.2510 -1.3100  
H -0.8800 7.1720 -0.6140  
C -4.7740 0.9500 -0.3170  
C -4.8140 -0.2670 0.5950  
N -4.4910 -1.5910 -0.0580  
C -3.0910 -1.5250 -0.6560  
C -0.5000 -4.0460 -2.0390  
C -1.2020 -2.7070 -1.8300  
C -2.4910 -2.8760 -1.0230  
H 0.4330 -3.9190 -2.5940  
H -1.4310 -2.2430 -2.7980  
H -2.2590 -3.4420 -0.1140  
H -3.7270 1.2150 -0.5020  
H -5.2570 0.7650 -1.2840  
H -5.7970 -0.3910 1.0560  
H -4.0680 -0.1150 1.3790  
C -5.4720 -1.9220 -1.1670  
H -5.0390 2.2690 1.3670  
H -6.5330 1.7990 0.5680  
H -5.3640 3.1920 -1.4920  
H -6.4660 3.9020 -0.3300  
H -4.6080 4.7350 1.0460  
H -4.5390 5.3400 -0.6070  
H -2.8120 3.5360 -1.1280  
H -2.7450 3.1890 0.6140  
H -7.6370 -3.2490 -2.1880  
H -7.1390 -0.6220 -0.7020  
H -9.4930 -0.8540 -1.6560  
H -9.8940 -2.2730 -2.6360  
H -9.6420 -2.4440 -0.8910  
H -7.4920 -1.6710 -2.9520  
H -7.2550 -2.2120 0.0500

H -4.3360 -3.6100 0.5040  
H -5.6410 -2.7280 1.2820  
H -4.2010 -1.7230 2.9000  
H -2.9610 -4.4710 2.4130  
H -3.6710 -2.9910 5.0160  
H -2.0380 -3.1050 4.3520  
H -2.4590 -0.9820 0.0560  
H -3.1780 -0.8950 -1.5440  
H -1.1380 -4.7450 -2.5920  
H -0.2510 -4.5060 -1.0760  
H -0.5270 -2.0150 -1.3170  
H -3.1910 -3.4840 -1.6090  
H -5.3040 -2.9710 -1.4190  
H -5.1800 -1.3260 -2.0330  
H 1.1710 -1.9190 -4.0270  
H 6.6500 1.4190 2.2780  
H 6.3490 -4.0620 -0.9760  
C 1.7020 -0.1100 1.7570  
C 1.0260 -1.0630 0.8860  
C 0.4030 -2.3280 1.4290  
C 0.2960 -2.3250 2.9580  
C 1.5680 -1.7960 3.6230  
C 1.7940 -0.3310 3.2400  
O 2.4820 -1.0290 0.9400  
H 1.7590 0.9200 1.4190  
Br -1.6560 0.8130 1.7800  
H 0.6400 -0.6750 -0.0530  
H -0.5960 -2.4320 0.9940  
H 0.9970 -3.1800 1.0760  
H 0.0650 -3.3360 3.3130  
H -0.5400 -1.6690 3.2350  
H 1.4860 -1.8790 4.7120  
H 2.4320 -2.3990 3.3170  
H 1.0140 0.2960 3.6880  
H 2.7630 0.0340 3.6010  
Mg 3.7230 -0.3730 -0.6330

**TS1\_Mg cat. 3'**

C 1.7810 1.6290 -1.4540  
C 0.6280 1.8930 -2.2940  
N 2.1690 0.3320 -1.6190  
C 1.3230 -0.2330 -2.5270  
C 0.3420 0.7370 -2.9490  
C 2.4210 2.5760 -0.6250  
H 0.1210 2.8430 -2.3850  
C 6.3070 0.3890 1.3080  
C 3.5870 2.3410 0.1290  
H -0.4420 0.5580 -3.6740  
N 4.2760 1.1650 0.1690  
C 4.2320 3.3060 1.0030  
C 5.3360 1.3460 1.0050  
C 5.3180 2.6900 1.5350  
C 6.3880 -0.9170 0.8270  
N 5.4760 -1.5040 0.0020  
C 5.9290 -2.7610 -0.2590  
C 7.4610 -1.8460 1.1140  
C 7.1780 -2.9890 0.4380  
C 1.4060 -1.5410 -3.0090  
C 2.3710 -2.4990 -2.7010  
N 3.3790 -2.3340 -1.7990  
C 4.1330 -3.4690 -1.8330  
C 2.4810 -3.8010 -3.3260  
C 3.5700 -4.4040 -2.7830  
C 5.3000 -3.6790 -1.0980  
H 3.8950 4.3150 1.1880  
H 6.0410 3.0970 2.2300  
H 8.3170 -1.6350 1.7430  
H 7.7540 -3.9050 0.4010  
H 1.8190 -4.1840 -4.0940  
H 3.9780 -5.3810 -3.0110  
C -4.6000 2.5370 0.3580  
C -4.5880 3.7960 -0.5130

C -3.7000 4.9110 0.0480  
C -2.2520 4.4480 0.1560  
C 1.8220 3.9420 -0.5750  
C 0.4990 4.1000 -0.1470  
C -0.0960 5.3620 -0.1710  
C 0.6490 6.4820 -0.5530  
C 1.9690 6.3240 -0.9500  
C 2.5540 5.0600 -0.9830  
C -9.7050 -1.2250 -1.7310  
C -8.2230 -1.3900 -2.0580  
C -7.3420 -1.3110 -0.8060  
H -3.1100 -2.0310 1.9100  
C -5.0680 -2.3100 0.9780  
C -4.1560 -2.1910 2.1950  
C -4.2810 -3.4580 3.0480  
C -3.6030 -3.3170 4.4080  
H -5.3440 -3.6910 3.1960  
H -3.6960 -4.2420 4.9870  
O -1.4010 5.5860 0.1350  
H -0.0440 3.2200 0.1880  
H 3.5740 4.9350 -1.3330  
H 2.5410 7.1920 -1.2630  
H 0.1690 7.4550 -0.5540  
C -4.9650 1.2740 -0.4270  
C -4.9680 0.0930 0.5310  
N -4.8530 -1.2770 -0.1050  
C -3.4680 -1.4080 -0.7320  
C -0.9940 -4.1840 -1.7550  
C -1.6380 -2.8010 -1.7140  
C -2.9740 -2.8290 -0.9610  
H -0.0230 -4.1500 -2.2540  
H -1.7940 -2.4210 -2.7310  
H -2.8170 -3.3350 -0.0010  
H -4.2080 1.1390 -1.2080  
H -5.9350 1.3880 -0.9250  
H -5.8760 0.0860 1.1390

H -4.1090 0.1750 1.2000  
C -5.8800 -1.4720 -1.1990  
H -3.6060 2.3600 0.7830  
H -5.2860 2.6740 1.2040  
H -4.2140 3.5380 -1.5140  
H -5.6100 4.1660 -0.6530  
H -4.0680 5.2530 1.0230  
H -3.7290 5.7710 -0.6290  
H -2.0090 3.8020 -0.7000  
H -2.0670 3.8620 1.0650  
H -8.0590 -2.3540 -2.5560  
H -7.5110 -0.3450 -0.3160  
H -9.8970 -0.2530 -1.2640  
H -10.3150 -1.2890 -2.6370  
H -10.0450 -2.0040 -1.0400  
H -7.9140 -0.6130 -2.7690  
H -7.6550 -2.0910 -0.1050  
H -4.9640 -3.2870 0.5020  
H -6.1060 -2.2090 1.2970  
H -4.4480 -1.3250 2.7980  
H -3.8500 -4.3070 2.5010  
H -4.0560 -2.5070 4.9900  
H -2.5380 -3.0930 4.2960  
H -2.7710 -0.8600 -0.0920  
H -3.5130 -0.8740 -1.6840  
H -1.6320 -4.9050 -2.2780  
H -0.8240 -4.5580 -0.7390  
H -0.9520 -2.0960 -1.2290  
H -3.6960 -3.4290 -1.5270  
H -5.7050 -2.4700 -1.6090  
H -5.6280 -0.7470 -1.9750  
H 0.6570 -1.8300 -3.7430  
H 7.1000 0.7070 1.9800  
H 5.7880 -4.6420 -1.2230  
C 1.6680 -0.2940 1.7880  
C 0.5610 -0.8580 0.9870

C -0.0520 -2.1640 1.4170  
C -0.1940 -2.2740 2.9360  
C 1.1110 -1.9150 3.6530  
C 1.5590 -0.4970 3.2910  
O 2.4710 -1.2240 1.1320  
H 1.8950 0.7540 1.5480  
Br -1.3100 0.7160 1.3810  
H 0.5380 -0.5880 -0.0610  
H -1.0200 -2.2920 0.9250  
H 0.6010 -2.9580 1.0370  
H -0.5120 -3.2900 3.1970  
H -0.9810 -1.5810 3.2600  
H 0.9740 -1.9970 4.7380  
H 1.8940 -2.6290 3.3700  
H 0.8360 0.2330 3.6750  
H 2.5310 -0.2740 3.7450  
Mg 3.5740 -0.7200 -0.4580

**I1\_Mg cat. 3'**

C 1.8550 1.5830 -1.4990  
C 0.6980 1.8290 -2.3410  
N 2.2410 0.2830 -1.6310  
C 1.3870 -0.3060 -2.5150  
C 0.4050 0.6550 -2.9600  
C 2.5010 2.5490 -0.6960  
H 0.1940 2.7780 -2.4600  
C 6.3560 0.3830 1.3240  
C 3.6660 2.3260 0.0650  
H -0.3820 0.4570 -3.6780  
N 4.3550 1.1520 0.1230  
C 4.2990 3.3030 0.9350  
C 5.3980 1.3410 0.9780  
C 5.3750 2.6920 1.4910  
C 6.4280 -0.9390 0.8850  
N 5.5200 -1.5390 0.0680  
C 5.9550 -2.8100 -0.1460

C 7.4860 -1.8730 1.2160  
C 7.1940 -3.0340 0.5730  
C 1.4580 -1.6290 -2.9610  
C 2.4140 -2.5880 -2.6230  
N 3.4220 -2.4020 -1.7280  
C 4.1590 -3.5470 -1.7140  
C 2.5060 -3.9150 -3.1990  
C 3.5880 -4.5110 -2.6310  
C 5.3190 -3.7480 -0.9610  
H 3.9580 4.3150 1.1010  
H 6.0890 3.1060 2.1930  
H 8.3390 -1.6520 1.8460  
H 7.7580 -3.9590 0.5720  
H 1.8410 -4.3170 -3.9530  
H 3.9830 -5.5010 -2.8210  
C -4.5250 2.5570 0.4840  
C -4.5260 3.8430 -0.3490  
C -3.5950 4.9280 0.2010  
C -2.1480 4.4480 0.2220  
C 1.9030 3.9150 -0.6540  
C 0.5910 4.0800 -0.1910  
C 0.0030 5.3450 -0.1890  
C 0.7390 6.4620 -0.5930  
C 2.0450 6.2980 -1.0320  
C 2.6250 5.0320 -1.0810  
C -9.7740 -0.9360 -1.6540  
C -8.3060 -1.1430 -2.0190  
C -7.4000 -1.1380 -0.7820  
H -3.1670 -2.2050 1.8310  
C -5.1430 -2.3140 0.9100  
C -4.2180 -2.3000 2.1220  
C -4.4190 -3.5900 2.9250  
C -3.7280 -3.5460 4.2850  
H -5.4940 -3.7620 3.0710  
H -3.8680 -4.4880 4.8230  
O -1.2880 5.5760 0.1770

H 0.0570 3.2030 0.1590  
H 3.6360 4.9040 -1.4550  
H 2.6110 7.1640 -1.3610  
H 0.2640 7.4380 -0.5750  
C -4.9340 1.3290 -0.3330  
C -4.9600 0.1090 0.5770  
N -4.9010 -1.2340 -0.1210  
C -3.5310 -1.3790 -0.7760  
C -1.1640 -4.1350 -2.0700  
C -1.7760 -2.7480 -1.9060  
C -3.0890 -2.7950 -1.1130  
H -0.2160 -4.0790 -2.6100  
H -1.9600 -2.2950 -2.8880  
H -2.9250 -3.3740 -0.1970  
H -4.1970 1.2040 -1.1330  
H -5.9090 1.4880 -0.8090  
H -5.8580 0.1060 1.2000  
H -4.0930 0.1310 1.2390  
C -5.9510 -1.3400 -1.2080  
H -3.5190 2.3600 0.8710  
H -5.1780 2.6740 1.3590  
H -4.2040 3.6070 -1.3730  
H -5.5470 4.2320 -0.4290  
H -3.9090 5.2440 1.2030  
H -3.6480 5.8080 -0.4480  
H -1.9560 3.8110 -0.6540  
H -1.9270 3.8500 1.1160  
H -8.1870 -2.0950 -2.5520  
H -7.5240 -0.1840 -0.2580  
H -9.9220 0.0260 -1.1530  
H -10.4040 -0.9500 -2.5490  
H -10.1280 -1.7240 -0.9810  
H -7.9830 -0.3540 -2.7100  
H -7.7290 -1.9300 -0.1030  
H -5.0850 -3.2670 0.3810  
H -6.1730 -2.1870 1.2480



H -4.4480 -1.4420 2.7610  
H -4.0440 -4.4400 2.3410  
H -4.1330 -2.7390 4.9050  
H -2.6530 -3.3760 4.1760  
H -2.8080 -0.9000 -0.1140  
H -3.5690 -0.7820 -1.6890  
H -1.8360 -4.8050 -2.6190  
H -0.9580 -4.5850 -1.0930  
H -1.0560 -2.0950 -1.3980  
H -3.8450 -3.3280 -1.7020  
H -5.8230 -2.3270 -1.6600  
H -5.6820 -0.5950 -1.9590  
H 0.7060 -1.9310 -3.6860  
H 7.1400 0.7120 2.0010  
H 5.7930 -4.7220 -1.0470  
C 1.5490 -0.3010 1.6960  
C 0.2330 -0.6760 0.9810  
C -0.2620 -2.0530 1.3900  
C -0.3800 -2.2100 2.9060  
C 0.9280 -1.8340 3.6120  
C 1.3840 -0.4270 3.2210  
O 2.4920 -1.1700 1.2120  
H 1.7660 0.7600 1.4600  
Br -1.2070 0.7030 1.3730  
H 0.3480 -0.5720 -0.0960  
H -1.2070 -2.2970 0.8940  
H 0.4910 -2.7500 1.0040  
H -0.6560 -3.2450 3.1410  
H -1.1930 -1.5670 3.2710  
H 0.8000 -1.9120 4.6990  
H 1.7090 -2.5440 3.3220  
H 0.6630 0.3190 3.5840  
H 2.3520 -0.1990 3.6820  
Mg 3.5790 -0.7770 -0.3520

**I2\_Mg cat. 3'**

|   |         |         |         |
|---|---------|---------|---------|
| C | 1.5640  | 1.9500  | -1.4680 |
| C | 0.3910  | 2.1520  | -2.3000 |
| N | 2.0390  | 0.6860  | -1.6570 |
| C | 1.2250  | 0.0800  | -2.5650 |
| C | 0.1750  | 0.9870  | -2.9660 |
| C | 2.1460  | 2.9210  | -0.6200 |
| H | -0.1740 | 3.0690  | -2.3810 |
| C | 6.1480  | 0.9300  | 1.2990  |
| C | 3.3160  | 2.7360  | 0.1460  |
| H | -0.5990 | 0.7650  | -3.6900 |
| N | 4.0750  | 1.6030  | 0.1620  |
| C | 3.8840  | 3.7140  | 1.0570  |
| C | 5.1090  | 1.8260  | 1.0190  |
| C | 4.9970  | 3.1490  | 1.5920  |
| C | 6.3350  | -0.3440 | 0.7610  |
| N | 5.4780  | -0.9630 | -0.0960 |
| C | 6.0410  | -2.1560 | -0.4290 |
| C | 7.4880  | -1.1890 | 1.0010  |
| C | 7.3070  | -2.3120 | 0.2590  |
| C | 1.3950  | -1.2100 | -3.0850 |
| C | 2.4360  | -2.1010 | -2.8220 |
| N | 3.4480  | -1.8820 | -1.9390 |
| C | 4.2930  | -2.9450 | -2.0280 |
| C | 2.6340  | -3.3710 | -3.4910 |
| C | 3.7860  | -3.8960 | -2.9960 |
| C | 5.4870  | -3.0860 | -1.3130 |
| H | 3.4800  | 4.6950  | 1.2610  |
| H | 5.6850  | 3.5780  | 2.3100  |
| H | 8.3240  | -0.9350 | 1.6420  |
| H | 7.9640  | -3.1690 | 0.1700  |
| H | 1.9820  | -3.7840 | -4.2510 |
| H | 4.2670  | -4.8280 | -3.2640 |
| C | -4.7550 | 2.4150  | 0.4830  |
| C | -4.8870 | 3.7250  | -0.2980 |
| C | -4.0590 | 4.8720  | 0.2930  |

C -2.5780 4.5160 0.3040  
C 1.4780 4.2530 -0.5360  
C 0.1590 4.3350 -0.0760  
C -0.4990 5.5650 -0.0460  
C 0.1780 6.7320 -0.4100  
C 1.4960 6.6500 -0.8390  
C 2.1440 5.4190 -0.9210  
C -9.8590 -1.3560 -1.6540  
C -8.3830 -1.4250 -2.0380  
C -7.4680 -1.4330 -0.8080  
H -3.1810 -2.2830 1.7860  
C -5.1430 -2.4820 0.8420  
C -4.2300 -2.4360 2.0620  
C -4.3720 -3.7470 2.8430  
C -3.6800 -3.6970 4.2020  
H -5.4390 -3.9660 2.9880  
H -3.7930 -4.6490 4.7300  
O -1.8060 5.7050 0.3080  
H -0.3300 3.4230 0.2480  
H 3.1630 5.3570 -1.2900  
H 2.0180 7.5550 -1.1360  
H -0.3470 7.6800 -0.3690  
C -5.1580 1.1890 -0.3400  
C -5.0990 -0.0460 0.5500  
N -4.9640 -1.3720 -0.1710  
C -3.5920 -1.4280 -0.8350  
C -1.0650 -4.0140 -2.1850  
C -1.7600 -2.6700 -1.9950  
C -3.0730 -2.8090 -1.2110  
H -0.1150 -3.8870 -2.7110  
H -1.9650 -2.2070 -2.9690  
H -2.8790 -3.4040 -0.3120  
H -4.4590 1.1080 -1.1800  
H -6.1600 1.3160 -0.7650  
H -5.9940 -0.1140 1.1720  
H -4.2350 0.0170 1.2130

C -6.0130 -1.5160 -1.2530  
H -3.7140 2.2600 0.7860  
H -5.3440 2.4710 1.4080  
H -4.5520 3.5610 -1.3320  
H -5.9410 4.0170 -0.3570  
H -4.4010 5.1240 1.3040  
H -4.1910 5.7660 -0.3250  
H -2.3350 3.9330 -0.5980  
H -2.3130 3.9000 1.1730  
H -8.1980 -2.3270 -2.6340  
H -7.6480 -0.5210 -0.2270  
H -10.0750 -0.4450 -1.0840  
H -10.4940 -1.3540 -2.5440  
H -10.1460 -2.2150 -1.0370  
H -8.1270 -0.5690 -2.6760  
H -7.7380 -2.2830 -0.1740  
H -5.0240 -3.4210 0.2980  
H -6.1810 -2.4250 1.1750  
H -4.5100 -1.6010 2.7120  
H -3.9630 -4.5700 2.2450  
H -4.1060 -2.9080 4.8310  
H -2.6100 -3.4960 4.0930  
H -2.8920 -0.9320 -0.1590  
H -3.6630 -0.8070 -1.7300  
H -1.6890 -4.7100 -2.7560  
H -0.8400 -4.4740 -1.2160  
H -1.0820 -1.9890 -1.4690  
H -3.7970 -3.3660 -1.8180  
H -5.8210 -2.4750 -1.7400  
H -5.8040 -0.7270 -1.9780  
H 0.6560 -1.5330 -3.8150  
H 6.9080 1.2800 1.9930  
H 6.0520 -3.9990 -1.4820  
C 1.4390 -0.1700 1.5780  
C 0.1070 -0.5680 0.9120  
C -0.2950 -1.9830 1.2820

C -0.3580 -2.1980 2.7960  
C 0.9500 -1.7810 3.4800  
C 1.3530 -0.3530 3.1040  
O 2.3870 -0.9840 1.0080  
H 1.6070 0.9030 1.3690  
Br -1.3650 0.7230 1.4320  
H 0.1690 -0.4130 -0.1640  
H -1.2370 -2.2690 0.8050  
H 0.4940 -2.6040 0.8430  
H -0.5780 -3.2530 3.0020  
H -1.1900 -1.6100 3.2090  
H 0.8450 -1.8760 4.5680  
H 1.7500 -2.4620 3.1760  
H 0.6280 0.3600 3.5200  
H 2.3330 -0.1090 3.5280  
C 3.0650 -3.8230 0.9450  
O 2.2070 -4.1530 0.2260  
O 3.9360 -3.6090 1.6880  
Mg 3.4820 -0.3390 -0.4730

**TS2\_Mg cat. 3'**

C 1.7060 1.7830 -1.6480  
C 0.5450 2.0540 -2.4730  
N 2.0610 0.4730 -1.7840  
C 1.1790 -0.0970 -2.6550  
C 0.2180 0.8880 -3.0890  
C 2.3780 2.7350 -0.8520  
H 0.0590 3.0140 -2.5770  
C 6.2770 0.5170 1.0240  
C 3.5670 2.4980 -0.1320  
H -0.5850 0.7080 -3.7940  
N 4.2420 1.3140 -0.0990  
C 4.2490 3.4660 0.7090  
C 5.3240 1.4890 0.7100  
C 5.3430 2.8420 1.2160  
C 6.3000 -0.8140 0.6080

N 5.3480 -1.4040 -0.1660  
C 5.7350 -2.6940 -0.3640  
C 7.3360 -1.7740 0.9260  
C 6.9880 -2.9390 0.3200  
C 1.1960 -1.4300 -3.0780  
C 2.1240 -2.4150 -2.7370  
N 3.1640 -2.2410 -1.8760  
C 3.8650 -3.4100 -1.8530  
C 2.1540 -3.7590 -3.2760  
C 3.2320 -4.3760 -2.7250  
C 5.0430 -3.6280 -1.1360  
H 3.9300 4.4830 0.8860  
H 6.0920 3.2490 1.8850  
H 8.2140 -1.5670 1.5250  
H 7.5200 -3.8820 0.3260  
H 1.4560 -4.1600 -4.0010  
H 3.5870 -5.3850 -2.8980  
C -4.5900 2.4600 0.9500  
C -4.6580 3.8060 0.2100  
C -3.6740 4.8630 0.7170  
C -2.2270 4.4350 0.4960  
C 1.7560 4.0870 -0.7300  
C 0.4710 4.1880 -0.1830  
C -0.1490 5.4300 -0.0590  
C 0.5290 6.5900 -0.4450  
C 1.8060 6.4890 -0.9790  
C 2.4190 5.2460 -1.1360  
C -10.0340 -0.6150 -0.9430  
C -8.6230 -0.7590 -1.5100  
C -7.5860 -0.9990 -0.4070  
H -3.1720 -2.8810 1.3320  
C -5.2500 -2.4610 0.8590  
C -4.1290 -2.7530 1.8470  
C -4.4540 -4.0370 2.6180  
C -3.3580 -4.4130 3.6120  
H -5.4070 -3.9110 3.1480

H -3.6270 -5.3180 4.1640  
O -1.4130 5.5950 0.4210  
H -0.0200 3.2760 0.1350  
H 3.4090 5.1730 -1.5760  
H 2.3260 7.3890 -1.2920  
H 0.0360 7.5510 -0.3340  
C -4.9640 1.2960 0.0270  
C -4.9470 -0.0180 0.7940  
N -5.0450 -1.2740 -0.0560  
C -3.7620 -1.4050 -0.8620  
C -1.7970 -3.9700 -2.9700  
C -2.1700 -2.6480 -2.3070  
C -3.4910 -2.7440 -1.5320  
H -0.8420 -3.8800 -3.4960  
H -2.2480 -1.8590 -3.0650  
H -3.4070 -3.5470 -0.7920  
H -4.2330 1.2750 -0.7890  
H -5.9480 1.4810 -0.4180  
H -5.7650 -0.0580 1.5160  
H -4.0070 -0.1020 1.3410  
C -6.2080 -1.1970 -1.0250  
H -3.5790 2.2790 1.3320  
H -5.2480 2.4800 1.8280  
H -4.4520 3.6400 -0.8560  
H -5.6800 4.1990 0.2640  
H -3.8480 5.0870 1.7760  
H -3.8350 5.7930 0.1610  
H -2.1420 3.8720 -0.4460  
H -1.8700 3.7800 1.3020  
H -8.5950 -1.5890 -2.2260  
H -7.5920 -0.1420 0.2750  
H -10.0890 0.2190 -0.2350  
H -10.7580 -0.4270 -1.7410  
H -10.3410 -1.5250 -0.4160  
H -8.3550 0.1470 -2.0680  
H -7.8840 -1.8790 0.1720

H -5.4220 -3.3220 0.2080  
H -6.1750 -2.2680 1.4040  
H -4.0040 -1.9290 2.5560  
H -4.5990 -4.8590 1.9050  
H -3.1910 -3.6110 4.3380  
H -2.4100 -4.6030 3.0960  
H -2.9460 -1.1470 -0.1890  
H -3.8010 -0.6200 -1.6190  
H -2.5570 -4.2790 -3.6960  
H -1.6910 -4.7660 -2.2260  
H -1.3640 -2.3410 -1.6280  
H -4.2950 -3.0210 -2.2240  
H -6.1860 -2.1250 -1.6010  
H -5.9780 -0.3790 -1.7100  
H 0.4200 -1.7180 -3.7830  
H 7.0920 0.8360 1.6690  
H 5.4830 -4.6190 -1.2120  
C 1.3770 -0.0710 1.4320  
C 0.1370 -0.6170 0.7010  
C -0.3980 -1.8840 1.3430  
C -0.7200 -1.6930 2.8250  
C 0.5150 -1.1900 3.5780  
C 1.0990 0.0730 2.9350  
O 2.3970 -0.9630 1.0950  
H 1.5980 0.9330 1.0390  
Br -1.2870 0.8000 0.6560  
H 0.3550 -0.7520 -0.3560  
H -1.2570 -2.2690 0.7830  
H 0.4080 -2.6200 1.2350  
H -1.0690 -2.6380 3.2540  
H -1.5400 -0.9700 2.9280  
H 0.2620 -0.9850 4.6250  
H 1.2640 -1.9890 3.5930  
H 0.3830 0.8960 3.0550  
H 2.0250 0.3680 3.4350  
C 3.4000 -1.9970 2.3330



O 3.2200 -3.1120 1.9540  
O 3.9040 -1.2300 3.0930  
Mg 3.4490 -0.5930 -0.5800

**I3a\_Mg cat. 3' (1,2-diaxial conformation)**

C -2.4640 0.6620 2.6110  
C -1.9820 0.6630 3.9780  
N -2.7410 -0.6150 2.2280  
C -2.4460 -1.4270 3.2780  
C -2.0000 -0.6300 4.4000  
C -2.6570 1.8080 1.8190  
H -1.6950 1.5430 4.5380  
C -4.4230 0.3350 -2.4500  
C -3.2710 1.8250 0.5520  
H -1.7220 -1.0180 5.3720  
N -3.5970 0.7190 -0.1740  
C -3.6360 3.0160 -0.1880  
C -4.1150 1.1500 -1.3550  
C -4.1930 2.5940 -1.3540  
C -4.2600 -1.0480 -2.5440  
N -3.8000 -1.8530 -1.5470  
C -3.8260 -3.1320 -2.0130  
C -4.5770 -1.8500 -3.7080  
C -4.3030 -3.1410 -3.3810  
C -2.4840 -2.8250 3.2490  
C -2.7210 -3.6420 2.1420  
N -2.9880 -3.1990 0.8810  
C -3.1460 -4.2960 0.0900  
C -2.6980 -5.0900 2.1520  
C -2.9520 -5.4950 0.8780  
C -3.4970 -4.2650 -1.2630  
H -3.4950 4.0330 0.1500  
H -4.5910 3.1990 -2.1600  
H -4.9690 -1.4660 -4.6420  
H -4.4240 -4.0260 -3.9930  
H -2.5170 -5.7050 3.0250

H -3.0240 -6.5070 0.5000  
C 3.9310 1.5240 0.3930  
C 4.4530 2.4980 1.4480  
C 3.5660 3.7440 1.5920  
C 2.1060 3.3680 1.7900  
C -2.0220 3.0810 2.2850  
C -0.6360 3.1680 2.1050  
C 0.0470 4.3370 2.4350  
C -0.6590 5.4220 2.9690  
C -2.0300 5.3220 3.1600  
C -2.7230 4.1570 2.8210  
C 8.3590 -3.9470 -0.3770  
C 7.0750 -3.8120 0.4390  
C 6.0520 -2.8990 -0.2450  
H 1.0000 -1.9640 -0.8210  
C 2.9460 -2.9170 -0.9440  
C 1.6810 -2.3570 -1.5780  
C 0.9240 -3.4370 -2.3570  
C -0.2910 -2.8470 -3.0740  
H 1.5930 -3.9210 -3.0820  
H -0.8740 -3.6280 -3.5710  
O 1.3860 4.4990 2.2630  
H -0.1250 2.3110 1.6790  
H -3.7970 4.0890 2.9650  
H -2.5700 6.1670 3.5790  
H -0.1190 6.3280 3.2240  
C 4.8240 0.3030 0.1530  
C 4.1080 -0.7580 -0.6980  
N 3.6470 -1.9960 0.0430  
C 2.7070 -1.5820 1.1650  
C 0.7520 -3.2910 4.0150  
C 1.2420 -2.1710 3.1020  
C 2.0410 -2.7230 1.9160  
H 0.1610 -2.8880 4.8420  
H 1.8710 -1.4810 3.6800  
H 1.3560 -3.2740 1.2620

H 5.1620 -0.1120 1.1090  
H 5.7370 0.6060 -0.3710  
H 4.7300 -1.1150 -1.5190  
H 3.2060 -0.3270 -1.1340  
C 4.8230 -2.7450 0.6420  
H 2.9310 1.1810 0.6810  
H 3.8050 2.0580 -0.5560  
H 4.5090 1.9810 2.4160  
H 5.4760 2.8090 1.2010  
H 3.6500 4.3720 0.6970  
H 3.9040 4.3410 2.4460  
H 2.0120 2.5470 2.5170  
H 1.6740 3.0220 0.8450  
H 6.6300 -4.8020 0.5970  
H 6.5170 -1.9240 -0.4280  
H 8.8370 -2.9720 -0.5220  
H 9.0750 -4.6020 0.1280  
H 8.1540 -4.3730 -1.3660  
H 7.3110 -3.4110 1.4320  
H 5.7910 -3.3260 -1.2200  
H 2.7200 -3.8330 -0.3950  
H 3.6840 -3.1650 -1.7100  
H 1.9270 -1.5390 -2.2640  
H 0.5950 -4.2160 -1.6580  
H 0.0210 -2.1220 -3.8360  
H -0.9460 -2.3290 -2.3670  
H 1.9550 -0.9090 0.7450  
H 3.3180 -0.9940 1.8550  
H 1.5960 -3.8480 4.4400  
H 0.1190 -3.9950 3.4640  
H 0.3940 -1.5880 2.7270  
H 2.7850 -3.4360 2.2910  
H 4.4420 -3.7280 0.9250  
H 5.0950 -2.2250 1.5630  
H -2.2600 -3.3330 4.1830  
H -4.8100 0.8380 -3.3320

H -3.5810 -5.2240 -1.7670  
C -0.3120 0.1540 -0.3710  
O 0.5840 0.6410 0.3360  
O -0.9030 -0.9490 -0.2010  
C 1.3010 1.9120 -2.1950  
C -0.1590 2.1010 -1.7610  
H 1.8300 1.3700 -1.4170  
H -0.1990 2.6930 -0.8420  
C -0.9950 2.7480 -2.8580  
H -0.6540 3.7850 -2.9690  
H -2.0330 2.7780 -2.5240  
O -0.7170 0.8100 -1.5060  
Br 2.1860 3.6810 -2.1860  
C -0.8700 2.0140 -4.1960  
H -1.4580 2.5370 -4.9580  
H -1.2990 1.0090 -4.0940  
C 1.4370 1.2390 -3.5530  
H 1.0820 0.2080 -3.4170  
H 2.4930 1.1850 -3.8400  
C 0.5930 1.9100 -4.6380  
H 0.9920 2.9130 -4.8350  
H 0.6760 1.3420 -5.5710  
Mg -2.8600 -1.2120 0.2170

**TS3a\_Mg cat. 3' (1,2-diaxial conformation)**

C -2.1650 0.8250 2.6120  
C -1.5760 0.7550 3.9340  
N -2.5830 -0.4150 2.2360  
C -2.2770 -1.2730 3.2490  
C -1.6710 -0.5400 4.3380  
C -2.3130 2.0020 1.8500  
H -1.1730 1.5960 4.4830  
C -4.7470 0.8200 -2.1760  
C -3.0450 2.1110 0.6550  
H -1.3550 -0.9670 5.2810  
N -3.6390 1.0720 -0.0000

C -3.2480 3.3360 -0.0950  
C -4.1770 1.5730 -1.1440  
C -3.9750 3.0040 -1.1940  
C -4.8130 -0.5710 -2.2710  
N -4.3230 -1.4420 -1.3460  
C -4.5770 -2.7010 -1.8000  
C -5.3990 -1.3090 -3.3710  
C -5.2490 -2.6290 -3.0810  
C -2.4510 -2.6600 3.2080  
C -2.9180 -3.4230 2.1370  
N -3.3220 -2.9230 0.9340  
C -3.7190 -3.9780 0.1700  
C -3.0490 -4.8650 2.1310  
C -3.5370 -5.2090 0.9090  
C -4.2730 -3.8780 -1.1110  
H -2.8840 4.3140 0.1880  
H -4.3210 3.6580 -1.9850  
H -5.8660 -0.8660 -4.2410  
H -5.5700 -3.4820 -3.6660  
H -2.8040 -5.5170 2.9600  
H -3.7730 -6.1990 0.5380  
C 4.0760 1.1250 0.0570  
C 4.7960 1.9700 1.1110  
C 4.0730 3.2880 1.4280  
C 2.6030 3.0510 1.7250  
C -1.5230 3.1920 2.2910  
C -0.1340 3.1200 2.1240  
C 0.6800 4.2000 2.4640  
C 0.1000 5.3580 2.9950  
C -1.2750 5.4210 3.1680  
C -2.0950 4.3460 2.8180  
C 8.1180 -4.5050 -0.8240  
C 6.9630 -4.1910 0.1240  
C 5.8500 -3.3970 -0.5690  
H 0.7500 -2.4880 -0.6830  
C 2.7190 -3.3720 -0.9630

C 1.3730 -2.8930 -1.4840  
C 0.6160 -4.0490 -2.1460  
C -0.7460 -3.5990 -2.6740  
H 1.2150 -4.4700 -2.9640  
H -1.2830 -4.4340 -3.1350  
O 2.0300 4.2070 2.3130  
H 0.2790 2.2060 1.7140  
H -3.1710 4.4050 2.9530  
H -1.7170 6.3220 3.5830  
H 0.7420 6.1930 3.2570  
C 4.8220 -0.1590 -0.3280  
C 3.9180 -1.2050 -1.0050  
N 3.5170 -2.3810 -0.1290  
C 2.6880 -1.8540 1.0290  
C 0.8390 -3.2550 4.1140  
C 1.3310 -2.2330 3.0920  
C 2.0990 -2.9090 1.9530  
H 0.2840 -2.7660 4.9190  
H 1.9770 -1.4990 3.5890  
H 1.4090 -3.5640 1.4090  
H 5.3130 -0.5760 0.5580  
H 5.6360 0.0840 -1.0190  
H 4.3910 -1.6390 -1.8860  
H 2.9790 -0.7470 -1.3170  
C 4.7300 -3.1070 0.4220  
H 3.0860 0.8500 0.4370  
H 3.9090 1.7360 -0.8390  
H 4.8910 1.3790 2.0330  
H 5.8170 2.1910 0.7760  
H 4.1440 3.9760 0.5780  
H 4.5470 3.7690 2.2910  
H 2.4710 2.1910 2.4010  
H 2.0750 2.8410 0.7900  
H 6.5500 -5.1250 0.5250  
H 6.2740 -2.4670 -0.9610  
H 8.5630 -3.5860 -1.2200

H 8.9050 -5.0640 -0.3090  
H 7.7770 -5.1070 -1.6730  
H 7.3350 -3.6180 0.9820  
H 5.4800 -3.9740 -1.4240  
H 2.5840 -4.2520 -0.3320  
H 3.3680 -3.6610 -1.7940  
H 1.5050 -2.0880 -2.2150  
H 0.4750 -4.8540 -1.4130  
H -0.6340 -2.8120 -3.4290  
H -1.3670 -3.1970 -1.8680  
H 1.9020 -1.2330 0.5920  
H 3.3550 -1.2010 1.5970  
H 1.6790 -3.7970 4.5640  
H 0.1730 -3.9860 3.6440  
H 0.4790 -1.6800 2.6800  
H 2.8860 -3.5410 2.3800  
H 4.3580 -4.0410 0.8440  
H 5.1100 -2.5080 1.2520  
H -2.1700 -3.2060 4.1040  
H -5.1500 1.3810 -3.0150  
H -4.5400 -4.8110 -1.5990  
C -0.4790 0.0070 -0.8470  
O 0.7710 0.1240 -0.6990  
O -1.1820 -0.9420 -0.4520  
C 1.1920 1.7860 -1.7620  
C -0.2840 2.1800 -1.7230  
H 1.8160 1.9410 -0.9120  
H -0.4660 2.8460 -0.8740  
C -0.7770 2.7910 -3.0310  
H -0.3730 3.8020 -3.1100  
H -1.8670 2.8600 -2.9660  
O -1.0810 0.9960 -1.5310  
Br 2.1640 4.1210 -2.0000  
C -0.3520 1.9500 -4.2380  
H -0.7160 2.4230 -5.1560  
H -0.8280 0.9630 -4.1790

C 1.7320 1.1630 -3.0220  
H 1.4350 0.1070 -3.0010  
H 2.8250 1.1990 -3.0120  
C 1.1700 1.7930 -4.3050  
H 1.6360 2.7730 -4.4440  
H 1.4520 1.1640 -5.1570  
Mg -3.1050 -0.9400 0.2790

**I4a\_Mg cat. 3' (1,2-diaxial conformation)**

C 2.2110 0.7170 -2.3370  
C 1.4530 1.0570 -3.5250  
N 2.1140 -0.6210 -2.1020  
C 1.2860 -1.1350 -3.0540  
C 0.8910 -0.0930 -3.9740  
C 2.9150 1.6400 -1.5410  
H 1.3700 2.0470 -3.9520  
C 5.2800 -0.9380 1.8310  
C 3.7720 1.3030 -0.4750  
H 0.2520 -0.2320 -4.8370  
N 4.0030 0.0350 -0.0300  
C 4.5100 2.2430 0.3450  
C 4.8480 0.1280 1.0370  
C 5.1910 1.5120 1.2660  
C 4.8890 -2.2770 1.7410  
N 3.9770 -2.7660 0.8550  
C 3.8260 -4.0930 1.1230  
C 5.3530 -3.3440 2.6010  
C 4.6940 -4.4700 2.2180  
C 0.8340 -2.4550 -3.1110  
C 1.1660 -3.4990 -2.2440  
N 2.0160 -3.3930 -1.1850  
C 2.1320 -4.6340 -0.6320  
C 0.7010 -4.8640 -2.3580  
C 1.2990 -5.5670 -1.3580  
C 2.9590 -4.9550 0.4460  
H 4.5110 3.3170 0.2250



H 5.8580 1.8710 2.0410  
H 6.0890 -3.2360 3.3880  
H 4.7800 -5.4670 2.6320  
H 0.0230 -5.2300 -3.1190  
H 1.2020 -6.6220 -1.1340  
C -3.5400 2.8420 0.4900  
C -3.7680 4.0660 -0.4040  
C -2.5820 5.0420 -0.4440  
C -1.2850 4.3330 -0.8080  
C 2.5960 3.0880 -1.7400  
C 1.2800 3.4850 -1.4560  
C 0.9170 4.8290 -1.5330  
C 1.8650 5.7840 -1.9210  
C 3.1590 5.3820 -2.2220  
C 3.5350 4.0400 -2.1320  
C -9.2210 -0.6640 2.5870  
C -8.4180 -0.6240 1.2890  
C -6.9190 -0.8340 1.5300  
H -2.1410 -1.7130 0.3100  
C -4.1810 -2.0150 1.0560  
C -2.6600 -2.1540 1.1680  
C -2.2610 -3.6270 1.3060  
C -0.7470 -3.8140 1.3410  
H -2.7180 -4.0520 2.2100  
H -0.4840 -4.8730 1.4230  
O -0.3300 5.2930 -1.2420  
H 0.5660 2.7140 -1.1830  
H 4.5510 3.7360 -2.3610  
H 3.8880 6.1250 -2.5310  
H 1.5700 6.8270 -1.9810  
C -4.5940 1.7460 0.2760  
C -4.1370 0.4360 0.9210  
N -4.6690 -0.8250 0.2590  
C -4.1500 -0.8620 -1.1800  
C -2.8500 -3.3420 -3.8250  
C -3.2070 -2.0170 -3.1560

C -3.9520 -2.2240 -1.8290  
H -2.3300 -3.1740 -4.7730  
H -3.8180 -1.4060 -3.8340  
H -3.3300 -2.8730 -1.2070  
H -4.6960 1.6120 -0.8050  
H -5.5760 2.0530 0.6540  
H -4.4150 0.3840 1.9760  
H -3.0510 0.3560 0.8380  
C -6.1780 -0.8400 0.2000  
H -2.5780 2.3920 0.2260  
H -3.4930 3.1390 1.5470  
H -3.9480 3.7120 -1.4280  
H -4.6740 4.6040 -0.0960  
H -2.4650 5.5520 0.5200  
H -2.7810 5.8160 -1.1940  
H -1.4540 3.5820 -1.5930  
H -0.8860 3.7950 0.0600  
H -8.7890 -1.3950 0.6020  
H -6.5500 -0.0330 2.1800  
H -8.8820 0.1100 3.2840  
H -10.2860 -0.5010 2.3940  
H -9.1140 -1.6340 3.0860  
H -8.5710 0.3410 0.7900  
H -6.7740 -1.7800 2.0620  
H -4.6260 -2.8930 0.5830  
H -4.6250 -1.9190 2.0480  
H -2.2970 -1.5950 2.0370  
H -2.6730 -4.1930 0.4590  
H -0.3000 -3.2830 2.1870  
H -0.2820 -3.4180 0.4330  
H -3.1960 -0.3290 -1.1740  
H -4.8560 -0.2770 -1.7710  
H -3.7450 -3.9390 -4.0340  
H -2.1900 -3.9330 -3.1790  
H -2.2920 -1.4480 -2.9490  
H -4.9040 -2.7430 -2.0000

H -6.4480 -1.7250 -0.3830  
H -6.4640 0.0380 -0.3830  
H 0.1490 -2.6960 -3.9200  
H 5.9820 -0.6920 2.6230  
H 2.9450 -5.9910 0.7770  
C 0.9600 -0.2230 1.6820  
O -0.0140 -0.1390 2.5880  
O 1.3400 -1.2750 1.2080  
C -0.0170 1.2180 3.1050  
C 0.6120 1.9710 1.9320  
H -1.0590 1.5020 3.2580  
H -0.1300 2.1130 1.1410  
C 1.3630 3.2460 2.2440  
H 0.6120 4.0420 2.3490  
H 1.9740 3.5020 1.3720  
O 1.5050 0.9530 1.4250  
Br -0.9730 0.5620 -0.8440  
C 2.1970 3.1560 3.5210  
H 2.6310 4.1360 3.7430  
H 3.0320 2.4610 3.3640  
C 0.7960 1.2630 4.3990  
H 1.6480 0.5810 4.2940  
H 0.1860 0.8870 5.2260  
C 1.3320 2.6700 4.6860  
H 0.5000 3.3690 4.8450  
H 1.9100 2.6490 5.6160  
Mg 2.7250 -1.6010 -0.3640

**I3b\_Mg cat. 3' (1,2-diaxial conformation)**

C -2.4760 0.2390 2.4950  
C -1.6650 -0.2440 3.5950  
N -3.1950 -0.8040 1.9780  
C -2.8590 -1.9200 2.6880  
C -1.8970 -1.5780 3.7050  
C -2.5160 1.5710 2.0260  
H -1.0140 0.3620 4.2090

C -5.8500 1.7360 -1.5240  
C -3.3450 2.0400 0.9840  
H -1.4730 -2.2710 4.4200  
N -4.2730 1.2960 0.3100  
C -3.3320 3.3860 0.4450  
C -4.8510 2.1120 -0.6180  
C -4.2690 3.4290 -0.5380  
C -6.4120 0.4690 -1.6890  
N -6.0520 -0.6440 -0.9880  
C -6.8000 -1.6790 -1.4640  
C -7.4490 0.1310 -2.6400  
C -7.6910 -1.2000 -2.4980  
C -3.3790 -3.2040 2.4860  
C -4.3400 -3.5930 1.5500  
N -4.9510 -2.7550 0.6650  
C -5.8530 -3.4990 -0.0380  
C -4.8640 -4.9320 1.3950  
C -5.8000 -4.8740 0.4110  
C -6.7090 -3.0040 -1.0260  
H -2.6810 4.1840 0.7700  
H -4.5400 4.2710 -1.1620  
H -7.9220 0.8280 -3.3200  
H -8.4000 -1.8120 -3.0410  
H -4.5560 -5.7920 1.9760  
H -6.4160 -5.6770 0.0250  
C 5.8110 -0.0870 2.3240  
C 4.3890 0.1330 2.8410  
C 3.9840 1.5930 3.0340  
C 2.4880 1.6500 3.2790  
C -1.5820 2.5510 2.6560  
C -0.2070 2.3050 2.6110  
C 0.6880 3.1900 3.2140  
C 0.2120 4.3540 3.8210  
C -1.1540 4.6070 3.8470  
C -2.0550 3.7060 3.2860  
C 8.9030 -5.3150 -0.5860

C 7.4960 -5.2000 -0.0020  
C 6.7630 -3.9530 -0.5060  
H 2.3970 -1.5410 -1.7250  
C 4.3120 -2.5580 -1.7010  
C 3.3990 -1.4290 -2.1540  
C 3.3030 -1.4020 -3.6810  
C 2.5520 -0.1640 -4.1660  
H 4.3090 -1.4150 -4.1210  
H 2.4110 -0.1780 -5.2510  
O 2.0380 3.0010 3.2210  
H 0.1450 1.4370 2.0670  
H -3.1230 3.8930 3.3380  
H -1.5230 5.5070 4.3310  
H 0.9220 5.0380 4.2740  
C 5.9340 -1.4630 1.6490  
C 5.3050 -1.4130 0.2470  
N 4.5570 -2.6590 -0.2090  
C 3.2490 -2.7110 0.5620  
C 0.0060 -4.7920 0.7920  
C 0.9930 -3.6490 1.0190  
C 2.2710 -3.8150 0.1860  
H -0.9330 -4.6100 1.3230  
H 1.2530 -3.6020 2.0850  
H 2.0020 -3.7540 -0.8760  
H 5.4460 -2.1990 2.2960  
H 6.9820 -1.7720 1.5730  
H 6.0780 -1.2300 -0.5030  
H 4.5830 -0.5940 0.1820  
C 5.3480 -3.9160 0.0600  
H 6.0680 0.6950 1.5990  
H 6.5360 -0.0090 3.1420  
H 3.6840 -0.2920 2.1190  
H 4.2550 -0.4280 3.7770  
H 4.1950 2.1410 2.1100  
H 4.5380 2.0660 3.8540  
H 2.2250 1.2300 4.2620

H 1. 9970 1. 0450 2. 5150  
H 6. 9160 -6. 0940 -0. 2610  
H 7. 3290 -3. 0640 -0. 2080  
H 9. 5110 -4. 4420 -0. 3220  
H 9. 4120 -6. 2060 -0. 2060  
H 8. 8700 -5. 3850 -1. 6780  
H 7. 5530 -5. 1680 1. 0930  
H 6. 7410 -3. 9740 -1. 6010  
H 3. 9180 -3. 5280 -2. 0150  
H 5. 2960 -2. 4400 -2. 1600  
H 3. 7670 -0. 4640 -1. 7970  
H 2. 7960 -2. 3080 -4. 0390  
H 3. 0970 0. 7490 -3. 9040  
H 1. 5650 -0. 1040 -3. 6970  
H 2. 7580 -1. 7360 0. 4480  
H 3. 5320 -2. 8200 1. 6120  
H 0. 4190 -5. 7450 1. 1430  
H -0. 2330 -4. 9090 -0. 2710  
H 0. 5360 -2. 6830 0. 7770  
H 2. 6910 -4. 8130 0. 3600  
H 4. 7640 -4. 7430 -0. 3490  
H 5. 3740 -4. 0410 1. 1440  
H -3. 0010 -3. 9820 3. 1430  
H -6. 2210 2. 5190 -2. 1810  
H -7. 3730 -3. 7210 -1. 5000  
C 2. 4030 3. 2750 -1. 8550  
C 1. 7670 3. 2160 -0. 4570  
H 3. 1410 2. 4810 -1. 9410  
H 2. 5420 3. 3690 0. 2980  
C 0. 6410 4. 2340 -0. 2960  
H 1. 0860 5. 2360 -0. 2940  
H 0. 1700 4. 0800 0. 6790  
O 1. 1950 1. 9240 -0. 2800  
Br 3. 4940 4. 9280 -1. 9830  
C -0. 3940 4. 1280 -1. 4200  
H -1. 1620 4. 8980 -1. 2900

H -0.9030 3.1600 -1.3450  
C 1.3780 3.2370 -2.9790  
H 0.9450 2.2310 -2.9620  
H 1.8790 3.3570 -3.9460  
C 0.2590 4.2640 -2.7980  
H 0.6740 5.2740 -2.9120  
H -0.4870 4.1340 -3.5900  
O 1.4490 -0.1890 0.2920  
C 2.0560 0.8660 0.0010  
O 3.2830 1.0810 -0.0690  
C -1.7760 -2.0070 -0.9470  
C -1.5320 -0.5590 -0.9360  
H -1.8190 -2.5210 0.0100  
H -1.3630 -0.0740 0.0200  
C -0.9970 0.1470 -2.1480  
H 0.0660 0.3230 -1.9540  
H -1.4790 1.1290 -2.2220  
O -2.8740 -1.0770 -1.1100  
C -1.1960 -0.6680 -3.4270  
H -0.6840 -0.1770 -4.2620  
H -2.2610 -0.7050 -3.6830  
C -1.4620 -2.8490 -2.1650  
H -2.4130 -3.2010 -2.5830  
H -0.9110 -3.7400 -1.8470  
C -0.6620 -2.0870 -3.2300  
H 0.3880 -2.0230 -2.9150  
H -0.6780 -2.6470 -4.1720  
Mg -4.4190 -0.7740 0.2920

**TS3b\_Mg cat. 3' (1,2-diaxial conformation)**

C 2.5450 0.5960 -2.4040  
C 1.6780 0.2880 -3.5300  
N 3.2200 -0.5360 -2.0360  
C 2.8150 -1.5380 -2.8660  
C 1.8390 -1.0360 -3.8000  
C 2.6730 1.8590 -1.7950

H 1.0460 0.9940 -4.0440  
C 6.0360 1.4210 1.6980  
C 3.5390 2.1660 -0.7210  
H 1.3620 -1.6130 -4.5840  
N 4.4050 1.2820 -0.1430  
C 3.6340 3.4460 -0.0530  
C 5.0550 1.9520 0.8590  
C 4.5740 3.3110 0.9230  
C 6.5470 0.1190 1.6960  
N 6.1180 -0.8760 0.8760  
C 6.8490 -1.9890 1.1770  
C 7.5960 -0.3750 2.5600  
C 7.7900 -1.6770 2.2350  
C 3.2690 -2.8640 -2.8260  
C 4.2490 -3.4030 -1.9900  
N 4.9210 -2.7080 -1.0320  
C 5.8100 -3.5650 -0.4610  
C 4.7230 -4.7680 -2.0290  
C 5.6970 -4.8710 -1.0800  
C 6.7030 -3.2340 0.5620  
H 3.0650 4.3290 -0.2990  
H 4.9130 4.0640 1.6260  
H 8.1180 0.2140 3.3100  
H 8.4920 -2.3810 2.6640  
H 4.3640 -5.5370 -2.7020  
H 6.2890 -5.7370 -0.8240  
C -5.8860 1.2980 -1.6620  
C -4.5550 1.4290 -2.4070  
C -3.8320 2.7590 -2.2020  
C -2.4290 2.6470 -2.7700  
C 1.8200 2.9630 -2.3220  
C 0.4270 2.8670 -2.2420  
C -0.3910 3.9050 -2.6890  
C 0.1870 5.0570 -3.2230  
C 1.5700 5.1570 -3.3120  
C 2.3890 4.1200 -2.8730



C -9.9170 -3.6530 0.2180  
C -8.6110 -3.6100 -0.5690  
C -7.4810 -2.9540 0.2300  
H -2.7000 -1.7150 1.4300  
C -4.7510 -2.4460 1.3630  
C -3.6260 -1.6510 2.0080  
C -3.3810 -2.1680 3.4290  
C -2.5020 -1.2180 4.2380  
H -4.3340 -2.3080 3.9520  
H -2.3040 -1.6060 5.2370  
O -1.7510 3.8870 -2.5860  
H 0.0070 1.9710 -1.7940  
H 3.4690 4.1980 -2.9550  
H 2.0150 6.0500 -3.7360  
H -0.4570 5.8580 -3.5630  
C -6.2130 -0.1870 -1.4030  
C -5.4750 -0.6420 -0.1420  
N -5.0660 -2.1070 -0.0790  
C -3.8480 -2.2820 -0.9780  
C -1.1880 -4.9090 -1.9280  
C -1.9880 -3.6140 -1.9420  
C -3.1180 -3.6140 -0.9000  
H -0.3660 -4.8710 -2.6520  
H -2.4160 -3.4600 -2.9410  
H -2.6750 -3.7560 0.0920  
H -5.9060 -0.7570 -2.2830  
H -7.2910 -0.3480 -1.2880  
H -6.0840 -0.4400 0.7390  
H -4.5380 -0.0900 -0.0320  
C -6.1730 -3.0180 -0.5550  
H -5.8420 1.8290 -0.7060  
H -6.6960 1.7580 -2.2390  
H -3.8780 0.6390 -2.0610  
H -4.7250 1.2510 -3.4750  
H -3.7640 2.9900 -1.1310  
H -4.3660 3.5870 -2.6830

H -2.4430 2.4070 -3.8400  
H -1.9200 1.8370 -2.2460  
H -8.3120 -4.6290 -0.8490  
H -7.7540 -1.9110 0.4470  
H -10.2460 -2.6430 0.4840  
H -10.7140 -4.1240 -0.3680  
H -9.8030 -4.2240 1.1490  
H -8.7580 -3.0580 -1.5040  
H -7.3740 -3.4630 1.1890  
H -4.5380 -3.5210 1.3910  
H -5.6780 -2.2770 1.9180  
H -3.8970 -0.5890 2.0570  
H -2.9070 -3.1550 3.3760  
H -2.9830 -0.2350 4.3430  
H -1.5340 -1.0600 3.7420  
H -3.1670 -1.4640 -0.7240  
H -4.2140 -2.1110 -1.9910  
H -1.8170 -5.7730 -2.1820  
H -0.7520 -5.1020 -0.9410  
H -1.3300 -2.7540 -1.7390  
H -3.7850 -4.4620 -1.0900  
H -5.7720 -4.0310 -0.5300  
H -6.3510 -2.7660 -1.6020  
H 2.8220 -3.5400 -3.5500  
H 6.4620 2.1030 2.4300  
H 7.3540 -4.0260 0.9140  
C -2.0240 2.4090 2.0530  
C -0.9850 2.4100 0.9220  
H -2.7650 1.6300 1.8640  
H -1.4760 2.6950 -0.0100  
C 0.1900 3.3370 1.2040  
H -0.1660 4.3670 1.0980  
H 0.9420 3.1750 0.4260  
O -0.4630 1.0860 0.7930  
Br -3.0850 4.0760 1.8890  
C 0.7970 3.1300 2.5930

H 1.6020 3.8570 2.7470  
H 1.2570 2.1360 2.6480  
C -1.4170 2.2800 3.4410  
H -1.0260 1.2570 3.5090  
H -2.1920 2.3790 4.2030  
C -0.2690 3.2680 3.6830  
H -0.6700 4.2900 3.6880  
H 0.1660 3.0880 4.6720  
O -0.7690 -1.0100 0.1420  
C -1.2710 0.1470 0.2140  
O -2.4070 0.4780 -0.1710  
C 1.1520 -1.4980 0.3920  
C 1.8280 -0.6250 1.3680  
H 1.3320 -1.2710 -0.6470  
H 1.8580 0.4320 1.0790  
C 1.3710 -0.7940 2.8090  
H 0.4040 -0.2860 2.9070  
H 2.0790 -0.2810 3.4750  
O 2.9790 -1.3420 1.0540  
C 1.2350 -2.2670 3.1970  
H 0.8310 -2.3490 4.2140  
H 2.2310 -2.7240 3.2080  
C 0.8280 -2.9120 0.7760  
H 1.7360 -3.5020 0.6240  
H 0.0770 -3.2880 0.0770  
C 0.3410 -3.0280 2.2210  
H -0.6800 -2.6300 2.2740  
H 0.2870 -4.0890 2.4980  
Mg 4.3580 -0.8210 -0.2760

**I4b\_Mg cat. 3' (1,2-diaxial conformation)**

C 2.3260 0.2820 -2.4650  
C 1.3680 -0.0260 -3.5090  
N 2.8690 -0.8750 -1.9880  
C 2.3020 -1.9000 -2.6860  
C 1.3540 -1.3790 -3.6410

C 2. 6570 1. 5830 -2. 0320  
H 0. 8070 0. 6980 -4. 0830  
C 6. 2500 1. 1260 1. 2070  
C 3. 6530 1. 8970 -1. 0860  
H 0. 7800 -1. 9720 -4. 3430  
N 4. 4460 0. 9860 -0. 4550  
C 3. 9840 3. 2330 -0. 6190  
C 5. 2710 1. 6800 0. 3770  
C 4. 9920 3. 0950 0. 2800  
C 6. 5650 -0. 2240 1. 3580  
N 5. 9240 -1. 2480 0. 7330  
C 6. 5280 -2. 3990 1. 1300  
C 7. 6290 -0. 7460 2. 1940  
C 7. 6080 -2. 0960 2. 0510  
C 2. 6020 -3. 2570 -2. 5300  
C 3. 5530 -3. 8150 -1. 6770  
N 4. 3360 -3. 1090 -0. 8150  
C 5. 1630 -4. 0030 -0. 2080  
C 3. 8790 -5. 2250 -1. 5990  
C 4. 8790 -5. 3410 -0. 6870  
C 6. 1680 -3. 6790 0. 7070  
H 3. 5080 4. 1510 -0. 9350  
H 5. 5020 3. 8740 0. 8330  
H 8. 2990 -0. 1460 2. 7980  
H 8. 2580 -2. 8290 2. 5130  
H 3. 4100 -6. 0080 -2. 1820  
H 5. 3940 -6. 2400 -0. 3700  
C -5. 7730 1. 6810 -0. 8100  
C -4. 4820 1. 6680 -1. 6230  
C -3. 7280 2. 9940 -1. 6900  
C -2. 4060 2. 7500 -2. 3940  
C 1. 8530 2. 7140 -2. 5840  
C 0. 4800 2. 7400 -2. 3240  
C -0. 3040 3. 8220 -2. 7160  
C 0. 2800 4. 8850 -3. 4050  
C 1. 6400 4. 8490 -3. 6920

C 2.4280 3.7720 -3.2910  
C -9.9020 -3.7350 -0.2620  
C -8.5190 -3.6120 -0.8970  
C -7.5560 -2.7970 -0.0260  
H -2.7790 -1.8560 1.6540  
C -4.7480 -2.7080 1.2810  
C -3.7060 -2.0790 2.1930  
C -3.4150 -3.0500 3.3440  
C -2.4920 -2.4450 4.3980  
H -4.3590 -3.3520 3.8160  
H -2.2950 -3.1620 5.2010  
O -1.6290 3.9390 -2.3940  
H 0.0610 1.9160 -1.7580  
H 3.4910 3.7550 -3.5120  
H 2.0920 5.6730 -4.2360  
H -0.3400 5.7240 -3.7030  
C -6.3420 0.2640 -0.6490  
C -5.6030 -0.5510 0.4300  
N -5.1200 -1.9390 0.0300  
C -3.9150 -1.7710 -0.8810  
C -1.3580 -3.9730 -2.7750  
C -2.1450 -2.7310 -2.3610  
C -3.1500 -3.0370 -1.2440  
H -0.6350 -3.7330 -3.5590  
H -2.6800 -2.3310 -3.2320  
H -2.6050 -3.4150 -0.3700  
H -6.3030 -0.2270 -1.6270  
H -7.4020 0.3160 -0.3850  
H -6.2430 -0.6980 1.3020  
H -4.7050 -0.0250 0.7600  
C -6.1890 -2.7290 -0.6960  
H -5.5920 2.1240 0.1780  
H -6.5210 2.3120 -1.3030  
H -3.7990 0.9350 -1.1850  
H -4.7090 1.3220 -2.6420  
H -3.5280 3.3680 -0.6770

H -4.3080 3.7610 -2.2150  
H -2.5610 2.4210 -3.4310  
H -1.8890 1.9420 -1.8650  
H -8.1000 -4.6120 -1.0640  
H -7.9730 -1.7960 0.1220  
H -10.3580 -2.7490 -0.1170  
H -10.5710 -4.3250 -0.8950  
H -9.8430 -4.2260 0.7150  
H -8.6070 -3.1400 -1.8830  
H -7.4900 -3.2700 0.9590  
H -4.4140 -3.6920 0.9440  
H -5.6770 -2.8480 1.8350  
H -4.0730 -1.1330 2.6040  
H -2.9600 -3.9630 2.9390  
H -2.9370 -1.5490 4.8450  
H -1.5320 -2.1610 3.9590  
H -3.2470 -1.0670 -0.3810  
H -4.2970 -1.2900 -1.7840  
H -2.0280 -4.7500 -3.1590  
H -0.8040 -4.3940 -1.9300  
H -1.4540 -1.9450 -2.0310  
H -3.8190 -3.8340 -1.5860  
H -5.7900 -3.7380 -0.8180  
H -6.2820 -2.2940 -1.6930  
H 2.0500 -3.9480 -3.1630  
H 6.8380 1.8290 1.7930  
H 6.7460 -4.5080 1.1090  
C -1.4490 3.0940 2.2110  
C -0.6300 2.8200 0.9420  
H -2.3050 2.4250 2.2520  
H -1.2340 3.0340 0.0580  
C 0.6760 3.6040 0.9040  
H 0.4170 4.6510 0.7120  
H 1.2660 3.2570 0.0540  
O -0.2620 1.4190 0.9070  
Br -2.2780 4.8690 1.9760

|    |         |         |         |
|----|---------|---------|---------|
| C  | 1.4880  | 3.4880  | 2.1960  |
| H  | 2.3730  | 4.1270  | 2.1180  |
| H  | 1.8590  | 2.4610  | 2.3020  |
| C  | -0.6210 | 3.0250  | 3.4870  |
| H  | -0.3490 | 1.9680  | 3.6200  |
| H  | -1.2430 | 3.3050  | 4.3420  |
| C  | 0.6530  | 3.8680  | 3.4190  |
| H  | 0.3810  | 4.9300  | 3.3700  |
| H  | 1.2300  | 3.7260  | 4.3390  |
| O  | -0.8040 | -0.7310 | 0.7640  |
| C  | -1.2270 | 0.5120  | 0.7800  |
| O  | -2.4170 | 0.7750  | 0.6930  |
| C  | 0.6110  | -1.1130 | 0.5470  |
| C  | 1.5690  | -0.7850 | 1.7190  |
| H  | 0.9400  | -0.5790 | -0.3480 |
| H  | 1.5030  | 0.2980  | 1.9170  |
| C  | 1.0890  | -1.5170 | 2.9860  |
| H  | 0.1090  | -1.1150 | 3.2830  |
| H  | 1.7900  | -1.2920 | 3.7980  |
| O  | 2.8270  | -1.1670 | 1.3510  |
| C  | 0.9990  | -3.0290 | 2.7670  |
| H  | 0.6190  | -3.5270 | 3.6690  |
| H  | 2.0100  | -3.4110 | 2.5860  |
| C  | 0.5520  | -2.6130 | 0.3110  |
| H  | 1.5580  | -2.9270 | 0.0250  |
| H  | -0.1080 | -2.8300 | -0.5330 |
| C  | 0.1130  | -3.3730 | 1.5650  |
| H  | -0.9320 | -3.1250 | 1.7960  |
| H  | 0.1420  | -4.4520 | 1.3680  |
| Mg | 4.0030  | -1.0890 | -0.1760 |

**I3a\_Mg cat. 3' (1,2-diequatorial conformation)**

|   |        |         |        |
|---|--------|---------|--------|
| C | 2.4640 | -0.4040 | 2.4370 |
| C | 1.8990 | -0.5310 | 3.7660 |
| N | 2.4520 | 0.9040  | 2.0600 |
| C | 1.8950 | 1.6130  | 3.0790 |

C 1.5640 0.7230 4.1700  
C 2.9730 -1.4720 1.6720  
H 1.7970 -1.4560 4.3160  
C 4.7090 0.4300 -2.4430  
C 3.6440 -1.3430 0.4410  
H 1.1260 1.0270 5.1130  
N 3.7930 -0.1760 -0.2480  
C 4.2510 -2.4270 -0.3100  
C 4.4410 -0.4710 -1.4080  
C 4.7600 -1.8810 -1.4440  
C 4.3500 1.7770 -2.5080  
N 3.6520 2.4490 -1.5510  
C 3.5310 3.7380 -1.9750  
C 4.6760 2.6740 -3.5970  
C 4.1650 3.8890 -3.2680  
C 1.6320 2.9860 3.0600  
C 1.8300 3.8720 2.0000  
N 2.3200 3.5310 0.7750  
C 2.3940 4.6750 0.0390  
C 1.5630 5.2940 2.0390  
C 1.9050 5.7910 0.8200  
C 2.9270 4.7670 -1.2500  
H 4.2790 -3.4640 -0.0070  
H 5.2870 -2.3820 -2.2470  
H 5.2300 2.4000 -4.4860  
H 4.2180 4.8130 -3.8310  
H 1.1860 5.8350 2.8990  
H 1.8570 6.8170 0.4790  
C -3.4420 -2.3480 0.3300  
C -3.7880 -3.4860 1.2980  
C -2.7050 -4.5720 1.3880  
C -1.3590 -3.9490 1.7200  
C 2.6240 -2.8550 2.1210  
C 1.2720 -3.2080 2.0140  
C 0.8570 -4.5120 2.2820  
C 1.7920 -5.4600 2.7100



C 3.1240 -5.0950 2.8510  
C 3.5510 -3.7990 2.5530  
C -8.7650 1.7530 -0.6380  
C -7.6310 1.8400 0.3820  
C -6.2560 1.6530 -0.2690  
H -1.1920 2.1760 -0.4670  
C -3.3400 2.4670 -0.7180  
C -1.9290 2.2990 -1.2640  
C -1.5390 3.5140 -2.1100  
C -0.1680 3.3310 -2.7580  
H -2.2990 3.6870 -2.8850  
H 0.1130 4.2150 -3.3400  
O -0.4290 -4.9390 2.1290  
H 0.5820 -2.4460 1.6710  
H 4.5980 -3.5280 2.6490  
H 3.8440 -5.8340 3.1890  
H 1.4590 -6.4720 2.9210  
C -4.2250 -1.0590 0.6010  
C -3.6610 0.0690 -0.2640  
N -3.7560 1.4590 0.3330  
C -2.8230 1.5230 1.5350  
C -1.5800 4.1610 4.0710  
C -1.8760 2.7940 3.4620  
C -2.5450 2.9140 2.0890  
H -1.0750 4.0600 5.0370  
H -2.5280 2.2220 4.1360  
H -1.8810 3.4710 1.4190  
H -4.1070 -0.8320 1.6650  
H -5.2990 -1.1950 0.4260  
H -4.1530 0.1070 -1.2370  
H -2.5970 -0.1020 -0.4300  
C -5.1650 1.7620 0.7890  
H -2.3890 -2.0750 0.4340  
H -3.5750 -2.6640 -0.7130  
H -3.9230 -3.0610 2.3030  
H -4.7470 -3.9420 1.0250

H -2. 6280 -5. 1250 0. 4430  
H -2. 9750 -5. 2950 2. 1660  
H -1. 4680 -3. 1960 2. 5160  
H -0. 9650 -3. 4360 0. 8400  
H -7. 6660 2. 8130 0. 8890  
H -6. 2280 0. 6750 -0. 7610  
H -8. 7700 0. 7770 -1. 1370  
H -9. 7370 1. 8880 -0. 1550  
H -8. 6620 2. 5240 -1. 4090  
H -7. 7730 1. 0770 1. 1570  
H -6. 1270 2. 4130 -1. 0460  
H -3. 4700 3. 4520 -0. 2620  
H -4. 0650 2. 3810 -1. 5300  
H -1. 8670 1. 4000 -1. 8860  
H -1. 5300 4. 4100 -1. 4740  
H -0. 1660 2. 4640 -3. 4280  
H 0. 6010 3. 1590 -2. 0010  
H -1. 8950 1. 0220 1. 2430  
H -3. 2950 0. 9140 2. 3080  
H -2. 5040 4. 7290 4. 2320  
H -0. 9340 4. 7480 3. 4110  
H -0. 9460 2. 2240 3. 3600  
H -3. 4660 3. 4990 2. 1990  
H -5. 1500 2. 7700 1. 2060  
H -5. 3740 1. 0690 1. 6070  
H 1. 2170 3. 4090 3. 9710  
H 5. 2450 0. 0310 -3. 3000  
H 2. 9120 5. 7490 -1. 7150  
C 0. 2870 -0. 1940 -0. 5670  
O -0. 5220 -0. 5730 0. 2950  
O 0. 8750 0. 9180 -0. 6360  
C 0. 0310 -2. 3120 -1. 6640  
C -0. 6830 -2. 5300 -2. 9900  
C -1. 2610 -3. 9370 -3. 0910  
C -0. 1590 -4. 9890 -2. 9100  
C 0. 5830 -4. 7800 -1. 5880

C 1.1340 -3.3580 -1.4980  
O 0.6040 -1.0180 -1.6240  
H -0.6970 -2.4000 -0.8560  
Br -2.1440 -1.2110 -3.1880  
H -0.0150 -2.3060 -3.8240  
H -2.0190 -4.0660 -2.3060  
H -1.7660 -4.0630 -4.0530  
H 0.5540 -4.9180 -3.7420  
H -0.6050 -5.9880 -2.9550  
H -0.1000 -4.9680 -0.7480  
H 1.4010 -5.5020 -1.4890  
H 1.6200 -3.1860 -0.5350  
H 1.8960 -3.1920 -2.2700  
Mg 2.6360 1.5620 0.0700

**TS3a\_Mg cat. 3' (1,2-diequatorial conformation)**

C -1.6220 -0.5330 -2.5130  
C -0.7150 -0.3070 -3.6220  
N -2.1360 0.6580 -2.0970  
C -1.6120 1.6250 -2.8970  
C -0.7240 1.0290 -3.8690  
C -1.9790 -1.7960 -2.0050  
H -0.1760 -1.0760 -4.1590  
C -5.3270 -1.0600 1.4400  
C -2.9940 -2.0340 -1.0520  
H -0.1930 1.5680 -4.6450  
N -3.6670 -1.0640 -0.3720  
C -3.4590 -3.3370 -0.6170  
C -4.5200 -1.6880 0.4850  
C -4.4240 -3.1170 0.3160  
C -5.4230 0.3060 1.6960  
N -4.7210 1.2750 1.0420  
C -5.1530 2.4720 1.5240  
C -6.3170 0.9130 2.6600  
C -6.1470 2.2570 2.5560  
C -1.8920 2.9920 -2.7970

C -2. 6720 3. 6220 -1. 8280  
N -3. 2640 2. 9990 -0. 7680  
C -3. 9400 3. 9550 -0. 0710  
C -2. 9740 5. 0390 -1. 7920  
C -3. 7470 5. 2470 -0. 6960  
C -4. 7680 3. 7190 1. 0280  
H -3. 1040 -4. 2920 -0. 9790  
H -5. 0070 -3. 8530 0. 8570  
H -6. 9920 0. 3710 3. 3100  
H -6. 6550 3. 0400 3. 1040  
H -2. 6490 5. 7640 -2. 5280  
H -4. 1790 6. 1770 -0. 3480  
C 5. 0600 -1. 0100 -0. 4750  
C 5. 3790 -2. 0100 -1. 5970  
C 4. 4740 -3. 2470 -1. 6140  
C 2. 9980 -2. 9190 -1. 7500  
C -1. 1560 -2. 9660 -2. 4320  
C 0. 1960 -2. 9650 -2. 0620  
C 0. 9980 -4. 0720 -2. 3320  
C 0. 4590 -5. 1870 -2. 9780  
C -0. 8740 -5. 1720 -3. 3680  
C -1. 6840 -4. 0670 -3. 1060  
C 7. 6540 4. 3670 0. 3100  
C 6. 2630 4. 3060 -0. 3180  
C 5. 3970 3. 2080 0. 3080  
H 0. 5270 2. 1890 1. 6570  
C 2. 6420 2. 6660 1. 6050  
C 1. 4420 1. 9590 2. 2100  
C 1. 2600 2. 3450 3. 6790  
C 0. 1340 1. 5280 4. 3110  
H 2. 1940 2. 1540 4. 2220  
H -0. 0360 1. 8190 5. 3530  
O 2. 3080 -4. 1470 -1. 9700  
H 0. 5860 -2. 1010 -1. 5350  
H -2. 7240 -4. 0620 -3. 4160  
H -1. 2870 -6. 0310 -3. 8880

H 1.0980 -6.0400 -3.1790  
C 4.1480 0.1500 -0.9120  
C 3.6150 0.8150 0.3480  
N 3.0290 2.2020 0.2080  
C 1.8210 2.1270 -0.7090  
C 0.7330 5.5420 -2.2840  
C 1.3640 4.1550 -2.2180  
C 1.0670 3.4470 -0.8920  
H 0.8760 6.0010 -3.2670  
H 2.4470 4.2430 -2.3740  
H -0.0040 3.2230 -0.8430  
H 3.3160 -0.2190 -1.5200  
H 4.7260 0.8340 -1.5440  
H 4.4030 0.8940 1.0990  
H 2.8400 0.1860 0.7810  
C 4.0340 3.1700 -0.3700  
H 4.6000 -1.5280 0.3780  
H 5.9890 -0.5740 -0.0890  
H 5.3290 -1.5050 -2.5710  
H 6.4110 -2.3610 -1.4890  
H 4.6230 -3.8220 -0.6920  
H 4.7580 -3.8960 -2.4490  
H 2.8170 -2.2490 -2.6020  
H 2.6210 -2.4250 -0.8430  
H 5.7640 5.2760 -0.2000  
H 5.9080 2.2460 0.1960  
H 8.1860 3.4180 0.1770  
H 8.2560 5.1580 -0.1450  
H 7.5900 4.5670 1.3850  
H 6.3540 4.1290 -1.3970  
H 5.2990 3.4000 1.3820  
H 2.4800 3.7450 1.5510  
H 3.5220 2.4950 2.2280  
H 1.5860 0.8760 2.1740  
H 1.0490 3.4190 3.7700  
H 0.3910 0.4630 4.2930

H -0.8030 1.6560 3.7590  
H 1.1850 1.3370 -0.3050  
H 2.2030 1.7750 -1.6700  
H 1.1740 6.2080 -1.5330  
H -0.3420 5.4870 -2.0840  
H 0.9880 3.5280 -3.0350  
H 1.2540 4.1340 -0.0590  
H 3.5650 4.1560 -0.3260  
H 4.1500 2.9110 -1.4240  
H -1.4490 3.6350 -3.5530  
H -5.9500 -1.7120 2.0470  
H -5.2220 4.5910 1.4920  
C -0.6780 -0.3300 0.9210  
O 0.4190 -0.5440 0.3930  
O -1.3900 0.7060 0.9090  
C 1.4300 -4.0060 1.6590  
C 0.6640 -2.8220 2.0460  
H 2.4200 -3.9900 2.1120  
C -0.6190 -2.5950 1.4090  
H -0.6240 -2.8380 0.3440  
O -1.2370 -1.3730 1.6630  
C -1.4170 -3.7380 2.1550  
H -2.4480 -3.5760 1.8300  
H -1.3790 -3.5880 3.2400  
C 0.5910 -5.2300 2.1810  
H 0.6670 -5.2680 3.2720  
H 1.0600 -6.1340 1.7830  
C -0.8700 -5.1030 1.7570  
H -0.9660 -5.2360 0.6730  
H -1.4640 -5.8870 2.2360  
H 1.5080 -4.0870 0.5690  
Br 3.1630 -1.3560 2.9890  
H 0.8760 -2.3210 2.9860  
Mg -3.0710 0.9610 -0.2330

**I4a\_Mg cat. 3' (1,2-diequatorial conformation)**

C 2.7330 1.7500 -2.0450  
C 2.4860 2.0400 -3.4430  
N 3.1680 0.4620 -1.9230  
C 3.1900 -0.0830 -3.1680  
C 2.7900 0.9120 -4.1390  
C 2.5620 2.6570 -0.9860  
H 2.1420 2.9880 -3.8330  
C 3.7240 0.3630 3.1340  
C 2.8900 2.4250 0.3660  
H 2.7360 0.7540 -5.2090  
N 3.2940 1.2270 0.8800  
C 2.8190 3.4020 1.4300  
C 3.4640 1.3940 2.2210  
C 3.2040 2.7690 2.5730  
C 3.8280 -0.9990 2.8580  
N 3.7320 -1.5610 1.6180  
C 3.9100 -2.9020 1.7660  
C 4.0580 -2.0360 3.8410  
C 4.1030 -3.2150 3.1670  
C 3.4800 -1.4230 -3.4590  
C 3.6910 -2.4550 -2.5460  
N 3.6410 -2.3220 -1.1880  
C 3.8680 -3.5530 -0.6480  
C 3.9560 -3.8390 -2.8830  
C 4.0550 -4.5190 -1.7110  
C 3.9530 -3.8280 0.7190  
H 2.5290 4.4380 1.3130  
H 3.2820 3.1860 3.5690  
H 4.1760 -1.8710 4.9050  
H 4.2630 -4.2070 3.5680  
H 4.0530 -4.2280 -3.8890  
H 4.2520 -5.5730 -1.5650  
C -4.4290 1.6440 -0.7620  
C -4.7640 2.8630 -1.6420  
C -3.8420 4.0730 -1.4620

C -2.3680 3.7710 -1.6700  
C 1.8390 3.9320 -1.2820  
C 0.4470 3.8440 -1.3980  
C -0.3170 4.9960 -1.5720  
C 0.3180 6.2400 -1.6690  
C 1.7000 6.3160 -1.5780  
C 2.4700 5.1680 -1.3790  
C -7.8500 -2.9530 -1.4330  
C -6.4650 -3.0460 -2.0710  
C -5.3980 -2.3470 -1.2230  
H -0.4110 -2.6080 0.1280  
C -2.5720 -2.8480 0.0050  
C -1.2910 -2.5940 0.7790  
C -1.1230 -3.6400 1.8830  
C 0.2280 -3.5030 2.5830  
H -1.9360 -3.5000 2.6060  
H 0.3360 -4.2480 3.3780  
O -1.6740 5.0090 -1.6360  
H -0.0120 2.8670 -1.3160  
H 3.5500 5.2340 -1.2900  
H 2.1860 7.2840 -1.6570  
H -0.2880 7.1290 -1.8090  
C -3.6230 0.5680 -1.5020  
C -3.2090 -0.5230 -0.5220  
N -2.8760 -1.8710 -1.1250  
C -1.6880 -1.6920 -2.0430  
C 0.7120 -3.8150 -4.1990  
C 0.1120 -2.5990 -3.5010  
C -1.1260 -2.9580 -2.6710  
H 1.5760 -3.5260 -4.8050  
H -0.1570 -1.8390 -4.2470  
H -0.8370 -3.6840 -1.9040  
H -2.7380 1.0110 -1.9720  
H -4.2480 0.1790 -2.3140  
H -3.9650 -0.6940 0.2450  
H -2.3110 -0.2100 0.0040



C -4.0440 -2.4190 -1.9170  
H -3.8900 1.9590 0.1410  
H -5.3540 1.1810 -0.4000  
H -4.7610 2.5580 -2.6980  
H -5.7850 3.1950 -1.4270  
H -3.9670 4.4870 -0.4530  
H -4.1370 4.8590 -2.1660  
H -2.1890 3.2750 -2.6360  
H -2.0040 3.1040 -0.8780  
H -6.1920 -4.1000 -2.2100  
H -5.6970 -1.3050 -1.0690  
H -8.1550 -1.9090 -1.3070  
H -8.6010 -3.4520 -2.0530  
H -7.8590 -3.4260 -0.4450  
H -6.4900 -2.5940 -3.0710  
H -5.3580 -2.8160 -0.2340  
H -2.5560 -3.8420 -0.4480  
H -3.4110 -2.7830 0.7010  
H -1.3520 -1.6200 1.2720  
H -1.2220 -4.6490 1.4600  
H 0.3380 -2.5100 3.0320  
H 1.0570 -3.6380 1.8780  
H -0.9160 -1.1850 -1.4600  
H -2.0140 -1.0040 -2.8260  
H -0.0200 -4.2940 -4.8600  
H 1.0530 -4.5560 -3.4690  
H 0.8640 -2.1430 -2.8470  
H -1.8690 -3.4400 -3.3160  
H -3.7970 -3.4570 -2.1490  
H -4.0740 -1.8740 -2.8630  
H 3.5000 -1.6940 -4.5120  
H 3.8230 0.6550 4.1760  
H 4.1220 -4.8650 0.9940  
C 0.4630 0.1480 0.7940  
O -0.4340 1.1090 0.5670  
O 1.0160 -0.4680 -0.1000

C -1.5880 2.7650 2.1390  
C -1.0700 1.3800 1.8540  
H -2.3850 3.0560 1.4490  
C 0.0480 1.0250 2.7980  
H 0.8040 1.8190 2.8180  
O 0.6650 -0.0780 2.0830  
C -0.4900 0.7680 4.1810  
H 0.3070 0.4820 4.8740  
H -1.2480 -0.0220 4.1500  
C -2.1480 2.6570 3.5800  
H -3.0110 1.9810 3.5580  
H -2.5040 3.6390 3.9050  
C -1.1270 2.1140 4.6020  
H -0.3300 2.8550 4.7480  
H -1.6240 1.9880 5.5680  
H -0.7840 3.5070 2.0660  
Br -3.7000 -1.0030 2.9470  
H -1.8870 0.6530 1.9530  
Mg 3.1830 -0.5950 -0.1360

**I3b\_Mg cat. 3' (1,2-diequatorial conformation)**

C 2.3190 0.1530 -2.7210  
C 1.5790 -0.1920 -3.9200  
N 2.9470 -0.9640 -2.2480  
C 2.6280 -1.9970 -3.0790  
C 1.7590 -1.5220 -4.1290  
C 2.3720 1.4320 -2.1270  
H 1.0010 0.4960 -4.5200  
C 5.3100 1.1040 1.7420  
C 3.0950 1.7640 -0.9620  
H 1.3600 -2.1300 -4.9320  
N 3.9370 0.9280 -0.2900  
C 3.0240 3.0320 -0.2620  
C 4.4080 1.6050 0.7960  
C 3.8370 2.9310 0.8230  
C 5.8700 -0.1740 1.7920

N 5.5870 -1.1840 0.9230  
C 6.2910 -2.2780 1.3250  
C 6.8140 -0.6410 2.7850  
C 7.0790 -1.9420 2.4930  
C 3.0920 -3.3140 -2.9610  
C 4.0060 -3.8140 -2.0320  
N 4.5950 -3.0820 -1.0460  
C 5.4390 -3.9110 -0.3690  
C 4.4950 -5.1760 -1.9810  
C 5.3840 -5.2340 -0.9540  
C 6.2270 -3.5390 0.7230  
H 2.4250 3.8800 -0.5620  
H 4.0330 3.6810 1.5790  
H 7.2140 -0.0440 3.5950  
H 7.7380 -2.6230 3.0180  
H 4.1970 -5.9710 -2.6520  
H 5.9580 -6.0890 -0.6160  
C -6.0280 0.8970 -1.8540  
C -4.6270 0.8830 -2.4570  
C -4.0720 2.2430 -2.8790  
C -2.5800 2.0750 -3.0800  
C 1.5580 2.5160 -2.7510  
C 0.1710 2.3580 -2.8300  
C -0.6220 3.3660 -3.3780  
C -0.0270 4.5380 -3.8540  
C 1.3510 4.6890 -3.7770  
C 2.1500 3.6850 -3.2310  
C -9.4120 -4.4340 0.7600  
C -8.0560 -4.3510 0.0620  
C -7.1920 -3.2130 0.6170  
H -2.5610 -1.2320 1.6900  
C -4.5130 -2.1810 1.7030  
C -3.5170 -1.1550 2.2200  
C -3.3020 -1.3530 3.7230  
C -2.4500 -0.2340 4.3130  
H -4.2730 -1.3830 4.2350

H -2.2540 -0.4010 5.3770  
O -1.9780 3.3080 -3.4490  
H -0.2610 1.4610 -2.4050  
H 3.2270 3.8080 -3.1750  
H 1.8100 5.6000 -4.1510  
H -0.6590 5.3150 -4.2710  
C -6.3690 -0.4670 -1.2370  
C -5.6100 -0.6850 0.0840  
N -4.9280 -2.0370 0.2540  
C -3.7220 -2.0560 -0.6670  
C -0.7100 -4.2460 -1.6750  
C -1.6290 -3.0330 -1.5520  
C -2.8100 -3.2730 -0.6010  
H 0.1600 -4.0120 -2.2990  
H -2.0120 -2.7710 -2.5470  
H -2.4190 -3.4170 0.4130  
H -6.1290 -1.2370 -1.9790  
H -7.4450 -0.5490 -1.0560  
H -6.2860 -0.5780 0.9330  
H -4.8170 0.0610 0.1970  
C -5.8450 -3.1850 -0.0940  
H -6.0900 1.6740 -1.0810  
H -6.7740 1.1480 -2.6170  
H -3.9310 0.4790 -1.7150  
H -4.6120 0.1930 -3.3140  
H -4.2340 2.9710 -2.0760  
H -4.5580 2.6210 -3.7850  
H -2.3630 1.3220 -3.8540  
H -2.1590 1.7130 -2.1410  
H -7.5230 -5.3040 0.1760  
H -7.7250 -2.2670 0.4800  
H -9.9730 -3.5010 0.6380  
H -10.0160 -5.2480 0.3470  
H -9.2900 -4.6160 1.8340  
H -8.2040 -4.2010 -1.0140  
H -7.0620 -3.3610 1.6940

H -4.1190 -3.1940 1.8150  
H -5.4350 -2.1210 2.2840  
H -3.8720 -0.1370 2.0420  
H -2.8240 -2.3250 3.9060  
H -2.9440 0.7370 4.2020  
H -1.4890 -0.1600 3.7970  
H -3.1340 -1.1570 -0.4480  
H -4.1250 -1.9570 -1.6780  
H -1.2330 -5.0970 -2.1270  
H -0.3380 -4.5690 -0.6960  
H -1.0710 -2.1580 -1.2010  
H -3.3310 -4.1950 -0.8880  
H -5.2910 -4.0990 0.1260  
H -5.9940 -3.1480 -1.1750  
H 2.7220 -4.0180 -3.7020  
H 5.6070 1.7920 2.5290  
H 6.8480 -4.3160 1.1600  
C 1.2950 -2.2850 0.6060  
C 1.2670 -0.8230 0.7440  
H 1.2140 -2.7020 -0.3970  
H 1.1270 -0.2280 -0.1550  
C 0.9110 -0.1690 2.0440  
H -0.1190 0.1840 1.9530  
H 1.5330 0.7250 2.1680  
O 2.5220 -1.5480 0.7840  
C 1.0670 -1.1210 3.2300  
H 0.6710 -0.6410 4.1310  
H 2.1300 -1.3190 3.4150  
C 0.9330 -3.1930 1.7610  
H 1.8420 -3.7280 2.0610  
H 0.2250 -3.9510 1.4070  
C 0.3340 -2.4360 2.9560  
H -0.7190 -2.2100 2.7400  
H 0.3440 -3.0820 3.8410  
C -2.0470 1.2660 0.2650  
O -3.1970 1.7020 0.4730

|    |         |         |         |
|----|---------|---------|---------|
| O  | -1.6900 | 0.1810  | -0.2470 |
| C  | -0.1620 | 5.2300  | 2.4500  |
| C  | -0.1190 | 3.7560  | 2.0620  |
| H  | 0.6400  | 5.4440  | 3.1640  |
| C  | -1.1890 | 3.3870  | 1.0420  |
| H  | -2.1820 | 3.4660  | 1.4960  |
| O  | -0.9570 | 2.0570  | 0.6240  |
| C  | -1.0890 | 4.3160  | -0.1720 |
| H  | -1.8890 | 4.0500  | -0.8700 |
| H  | -0.1410 | 4.1050  | -0.6820 |
| C  | -0.0480 | 6.1270  | 1.2120  |
| H  | 0.9330  | 5.9810  | 0.7400  |
| H  | -0.1020 | 7.1770  | 1.5190  |
| C  | -1.1500 | 5.7940  | 0.2060  |
| H  | -2.1290 | 6.0260  | 0.6480  |
| H  | -1.0510 | 6.4100  | -0.6940 |
| H  | -1.1120 | 5.4350  | 2.9600  |
| Br | -0.3500 | 2.6660  | 3.6960  |
| H  | 0.8650  | 3.4670  | 1.6830  |
| Mg | 4.0910  | -1.1360 | -0.5190 |

**TS3b\_Mg cat. 3' (1,2-diequatorial conformation)**

|   |        |         |         |
|---|--------|---------|---------|
| C | 2.4120 | 0.3700  | -2.6110 |
| C | 1.5100 | 0.1160  | -3.7180 |
| N | 2.9350 | -0.8130 | -2.1750 |
| C | 2.3970 | -1.8030 | -2.9430 |
| C | 1.4960 | -1.2290 | -3.9150 |
| C | 2.7000 | 1.6390  | -2.0680 |
| H | 0.9730 | 0.8680  | -4.2790 |
| C | 6.0240 | 0.9890  | 1.4230  |
| C | 3.6000 | 1.8920  | -1.0130 |
| H | 0.9490 | -1.7850 | -4.6670 |
| N | 4.3570 | 0.9500  | -0.3830 |
| C | 3.8560 | 3.1910  | -0.4190 |
| C | 5.0930 | 1.5900  | 0.5680  |
| C | 4.7830 | 3.0010  | 0.5560  |

C 6.3710 -0.3610 1.4830  
N 5.8050 -1.3450 0.7310  
C 6.4070 -2.5140 1.0800  
C 7.3840 -0.9290 2.3500  
C 7.4090 -2.2640 2.0980  
C 2.6800 -3.1680 -2.8290  
C 3.5990 -3.7740 -1.9710  
N 4.3610 -3.1160 -1.0540  
C 5.1550 -4.0420 -0.4520  
C 3.9150 -5.1880 -1.9450  
C 4.8830 -5.3530 -1.0050  
C 6.1010 -3.7660 0.5400  
H 3.3850 4.1200 -0.7100  
H 5.2210 3.7440 1.2120  
H 7.9940 -0.3680 3.0470  
H 8.0420 -3.0180 2.5480  
H 3.4620 -5.9410 -2.5770  
H 5.3800 -6.2690 -0.7120  
C -5.7560 2.0230 -1.3930  
C -4.3750 1.9180 -2.0300  
C -3.6700 3.2500 -2.3040  
C -2.1830 2.9650 -2.3950  
C 1.9720 2.8110 -2.6390  
C 0.5800 2.8660 -2.5160  
C -0.1320 3.9670 -2.9940  
C 0.5500 5.0200 -3.6110  
C 1.9300 4.9560 -3.7460  
C 2.6460 3.8590 -3.2670  
C -9.9740 -3.2740 -0.6180  
C -8.5690 -3.1750 -1.2060  
C -7.6290 -2.3530 -0.3170  
H -2.9280 -1.3310 1.5260  
C -4.8880 -2.1830 1.1130  
C -3.8790 -1.5140 2.0360  
C -3.6650 -2.4380 3.2440  
C -2.8520 -1.7950 4.3630

H -4.6390 -2.7500 3.6440  
H -2.6990 -2.5040 5.1840  
O -1.4800 4.0990 -2.8780  
H 0.0840 2.0480 -2.0090  
H 3.7250 3.8150 -3.3770  
H 2.4550 5.7720 -4.2330  
H -0.0160 5.8710 -3.9760  
C -6.3590 0.6400 -1.1080  
C -5.6780 -0.0870 0.0700  
N -5.1910 -1.5040 -0.2060  
C -3.9470 -1.4020 -1.0710  
C -1.3100 -3.6580 -2.7710  
C -2.0900 -2.4040 -2.3870  
C -3.2110 -2.6970 -1.3800  
H -0.5070 -3.4130 -3.4720  
H -2.5260 -1.9570 -3.2900  
H -2.7700 -3.1120 -0.4660  
H -6.3050 0.0550 -2.0320  
H -7.4260 0.7450 -0.8870  
H -6.3630 -0.1670 0.9160  
H -4.7890 0.4530 0.4040  
C -6.2300 -2.3410 -0.9210  
H -5.6900 2.5960 -0.4590  
H -6.4390 2.5750 -2.0510  
H -3.7300 1.3420 -1.3600  
H -4.4500 1.3540 -2.9710  
H -3.8550 3.9610 -1.4900  
H -4.0320 3.7100 -3.2300  
H -2.0000 2.1130 -3.0670  
H -1.8230 2.6870 -1.3970  
H -8.1550 -4.1830 -1.3420  
H -8.0280 -1.3390 -0.2230  
H -10.4220 -2.2820 -0.4970  
H -10.6290 -3.8620 -1.2680  
H -9.9550 -3.7560 0.3660  
H -8.6170 -2.7180 -2.2020



H -7.6190 -2.7930 0.6850  
H -4.5540 -3.1920 0.8610  
H -5.8460 -2.2730 1.6280  
H -4.2450 -0.5400 2.3780  
H -3.1630 -3.3540 2.9060  
H -3.3680 -0.9170 4.7680  
H -1.8700 -1.4690 4.0080  
H -3.2700 -0.7140 -0.5610  
H -4.2790 -0.9300 -1.9980  
H -1.9620 -4.4010 -3.2460  
H -0.8480 -4.1270 -1.8950  
H -1.4150 -1.6540 -1.9580  
H -3.8770 -3.4580 -1.8030  
H -5.8330 -3.3580 -0.9460  
H -6.2680 -1.9840 -1.9520  
H 2.1490 -3.8260 -3.5120  
H 6.5460 1.6540 2.1060  
H 6.6640 -4.6130 0.9240  
C 0.8020 -1.2100 0.3720  
C 1.6030 -0.5910 1.4450  
H 0.9850 -0.8470 -0.6300  
H 1.7790 0.4800 1.3080  
C 1.1670 -0.9200 2.8640  
H 0.2780 -0.3230 3.1030  
H 1.9630 -0.6150 3.5540  
O 2.6340 -1.3990 0.9720  
C 0.8630 -2.4120 3.0260  
H 0.4780 -2.6060 4.0350  
H 1.7930 -2.9790 2.9150  
C 0.3010 -2.6150 0.5510  
H 1.1110 -3.2910 0.2610  
H -0.5180 -2.7770 -0.1500  
C -0.1550 -2.8880 1.9860  
H -1.1000 -2.3590 2.1460  
H -0.3570 -3.9590 2.1090  
C -1.4170 0.7330 0.5700

|    |         |         |         |
|----|---------|---------|---------|
| O  | -2.5640 | 1.1960  | 0.5370  |
| O  | -1.0770 | -0.4560 | 0.2880  |
| C  | -0.5210 | 4.1060  | 3.6550  |
| C  | -0.4060 | 2.7390  | 2.9930  |
| H  | -0.3680 | 4.0040  | 4.7340  |
| C  | -0.6030 | 2.8090  | 1.4810  |
| H  | -1.6270 | 3.1180  | 1.2530  |
| O  | -0.3560 | 1.5340  | 0.9040  |
| C  | 0.4070  | 3.7890  | 0.8830  |
| H  | 0.2330  | 3.8540  | -0.1940 |
| H  | 1.4150  | 3.3740  | 1.0140  |
| C  | 0.4970  | 5.0780  | 3.0460  |
| H  | 1.5140  | 4.7310  | 3.2720  |
| H  | 0.3840  | 6.0620  | 3.5130  |
| C  | 0.3160  | 5.1700  | 1.5310  |
| H  | -0.6640 | 5.6160  | 1.3090  |
| H  | 1.0710  | 5.8320  | 1.0930  |
| H  | -1.5360 | 4.4930  | 3.5040  |
| Br | -1.7200 | 1.5030  | 3.7960  |
| H  | 0.5590  | 2.2730  | 3.2080  |
| Mg | 4.0340  | -1.1370 | -0.3970 |

**I4b\_Mg cat. 3' (1,2-diequatorial conformation)**

|   |        |         |         |
|---|--------|---------|---------|
| C | 2.3200 | 0.4180  | -2.5490 |
| C | 1.3740 | 0.2080  | -3.6290 |
| N | 2.8050 | -0.7870 | -2.1290 |
| C | 2.2070 | -1.7470 | -2.8900 |
| C | 1.2990 | -1.1340 | -3.8300 |
| C | 2.6840 | 1.6740  | -2.0200 |
| H | 0.8580 | 0.9860  | -4.1740 |
| C | 6.1440 | 0.8710  | 1.2970  |
| C | 3.6390 | 1.8840  | -1.0060 |
| H | 0.7140 | -1.6630 | -4.5720 |
| N | 4.3760 | 0.9050  | -0.4080 |
| C | 3.9930 | 3.1720  | -0.4340 |
| C | 5.1930 | 1.5120  | 0.4960  |

C 4.9580 2.9380 0.4920  
C 6.4360 -0.4930 1.3330  
N 5.7880 -1.4490 0.6140  
C 6.3690 -2.6400 0.9200  
C 7.4800 -1.1020 2.1350  
C 7.4400 -2.4340 1.8770  
C 2.4480 -3.1230 -2.8090  
C 3.3780 -3.7690 -1.9970  
N 4.1900 -3.1480 -1.0980  
C 4.9860 -4.1060 -0.5520  
C 3.6570 -5.1910 -2.0130  
C 4.6580 -5.4000 -1.1180  
C 5.9910 -3.8750 0.3900  
H 3.5580 4.1240 -0.7060  
H 5.4720 3.6590 1.1170  
H 8.1510 -0.5670 2.7960  
H 8.0720 -3.2140 2.2830  
H 3.1580 -5.9190 -2.6410  
H 5.1440 -6.3340 -0.8640  
C -5.7240 2.2620 -1.1300  
C -4.3520 2.1400 -1.7830  
C -3.6280 3.4610 -2.0560  
C -2.1510 3.1450 -2.2000  
C 1.9840 2.8750 -2.5650  
C 0.5970 2.9700 -2.4130  
C -0.0960 4.0970 -2.8540  
C 0.6010 5.1400 -3.4730  
C 1.9750 5.0360 -3.6420  
C 2.6710 3.9130 -3.1960  
C -10.1200 -2.9180 -0.5550  
C -8.7180 -2.8630 -1.1570  
C -7.7420 -2.0780 -0.2740  
H -2.9370 -1.4010 1.5170  
C -4.9480 -2.1180 1.1000  
C -3.8920 -1.5440 2.0320  
C -3.7110 -2.5220 3.2010

C -2. 7380 -2. 0130 4. 2580  
H -4. 6860 -2. 7190 3. 6660  
H -2. 6370 -2. 7370 5. 0720  
O -1. 4380 4. 2640 -2. 6970  
H 0. 0900 2. 1570 -1. 9110  
H 3. 7450 3. 8400 -3. 3340  
H 2. 5120 5. 8430 -4. 1320  
H 0. 0520 6. 0130 -3. 8110  
C -6. 3780 0. 8920 -0. 9020  
C -5. 7070 0. 0660 0. 2150  
N -5. 2670 -1. 3420 -0. 1620  
C -4. 0430 -1. 2250 -1. 0530  
C -1. 6860 -3. 5060 -3. 1030  
C -2. 3580 -2. 2340 -2. 5910  
C -3. 3650 -2. 5230 -1. 4700  
H -0. 9640 -3. 2740 -3. 8910  
H -2. 8780 -1. 7410 -3. 4230  
H -2. 8380 -2. 9690 -0. 6190  
H -6. 3760 0. 3570 -1. 8570  
H -7. 4320 1. 0330 -0. 6450  
H -6. 3820 -0. 0500 1. 0650  
H -4. 8020 0. 5590 0. 5750  
C -6. 3530 -2. 1000 -0. 9000  
H -5. 6330 2. 7920 -0. 1730  
H -6. 3900 2. 8640 -1. 7600  
H -3. 7080 1. 5390 -1. 1340  
H -4. 4490 1. 5900 -2. 7300  
H -3. 7730 4. 1650 -1. 2280  
H -4. 0080 3. 9390 -2. 9650  
H -2. 0110 2. 2930 -2. 8830  
H -1. 7610 2. 8490 -1. 2180  
H -8. 3400 -3. 8830 -1. 3000  
H -8. 1100 -1. 0530 -0. 1640  
H -10. 5350 -1. 9120 -0. 4280  
H -10. 7990 -3. 4830 -1. 2000  
H -10. 1080 -3. 4030 0. 4270

H -8.7600 -2.4010 -2.1510  
H -7.7310 -2.5290 0.7240  
H -4.6520 -3.1160 0.7690  
H -5.8940 -2.2160 1.6360  
H -4.1920 -0.5650 2.4190  
H -3.3520 -3.4840 2.8100  
H -3.0830 -1.0670 4.6900  
H -1.7460 -1.8480 3.8280  
H -3.3360 -0.5880 -0.5190  
H -4.3840 -0.6830 -1.9380  
H -2.4260 -4.2020 -3.5150  
H -1.1470 -4.0250 -2.3030  
H -1.6010 -1.5260 -2.2330  
H -4.0880 -3.2600 -1.8350  
H -6.0050 -3.1310 -0.9750  
H -6.3900 -1.6960 -1.9130  
H 1.8690 -3.7510 -3.4820  
H 6.7350 1.5110 1.9470  
H 6.5470 -4.7440 0.7330  
C 0.4670 -1.0420 0.3070  
C 1.4480 -0.8360 1.4960  
H 0.8660 -0.5460 -0.5790  
H 1.5410 0.2450 1.6870  
C 0.8730 -1.4980 2.7590  
H -0.0470 -0.9770 3.0560  
H 1.5950 -1.3600 3.5730  
O 2.6450 -1.3930 1.1340  
C 0.6150 -2.9900 2.5320  
H 0.1730 -3.4470 3.4260  
H 1.5810 -3.4760 2.3570  
C 0.2590 -2.5290 0.0680  
H 1.2340 -2.9440 -0.1940  
H -0.4040 -2.6790 -0.7870  
C -0.2870 -3.2300 1.3170  
H -1.2980 -2.8570 1.5310  
H -0.3840 -4.3050 1.1210

|    |         |         |         |
|----|---------|---------|---------|
| C  | -1.2230 | 0.7370  | 0.6830  |
| O  | -2.3790 | 1.1200  | 0.6720  |
| O  | -0.9150 | -0.5230 | 0.4760  |
| C  | -0.1240 | 3.9150  | 3.7920  |
| C  | -0.1170 | 2.5880  | 3.0410  |
| H  | 0.0510  | 3.7280  | 4.8550  |
| C  | -0.3460 | 2.7840  | 1.5430  |
| H  | -1.3600 | 3.1500  | 1.3570  |
| O  | -0.1650 | 1.5300  | 0.8660  |
| C  | 0.7020  | 3.7380  | 0.9770  |
| H  | 0.5010  | 3.8870  | -0.0870 |
| H  | 1.6850  | 3.2560  | 1.0490  |
| C  | 0.9360  | 4.8610  | 3.2190  |
| H  | 1.9350  | 4.4370  | 3.3840  |
| H  | 0.8990  | 5.8150  | 3.7550  |
| C  | 0.7140  | 5.0730  | 1.7210  |
| H  | -0.2410 | 5.5920  | 1.5630  |
| H  | 1.4960  | 5.7130  | 1.3020  |
| H  | -1.1170 | 4.3730  | 3.7000  |
| Br | -1.4840 | 1.3930  | 3.8160  |
| H  | 0.8220  | 2.0500  | 3.1930  |
| Mg | 3.8930  | -1.1770 | -0.3200 |
